# Supplementary material for: Bioactive prenylated phenyl derivatives derived from marine natural products: novel scaffolds for the design of BACE inhibitors
Source: Royal Society of Chemistry journal article supplement (doi:10.1039/c3md00236e), 2014-01-01

# Supporting Information

## **Bioactive prenylated phenyl derivatives derived from marine natural products: novel scaffold for the design of BACE inhibitors.**

Javier Lopez-Ogalla<sup>1</sup>, Esther Garcia-Palomero<sup>1</sup>, Jorge Sanchez-Quesada<sup>1</sup>,  
Laura Rubio<sup>1</sup>, Elena Delgado<sup>1</sup>, Pablo Garcia<sup>1</sup>, Miguel Medina<sup>1,2</sup>, Ana Castro<sup>1,3\*</sup>,  
Pilar Munoz<sup>1\*</sup>

<sup>1</sup> NOSCIRA S.A., Avenida de la Industria 52, 28760 Tres Cantos, Madrid, Spain

<sup>2</sup> Centro de Investigacion Biomedica en Red sobre Enfermedades Neurodegenerativas  
(CIBERNED), Nicolas Cabrera 1, 28049 - Madrid, Spain

<sup>3</sup> Instituto de Quimica Medica-CSIC, Juan de la Cierva 3, 28006 Madrid, Spain

### List of Content

1. General information .....(Page 2)
2. <sup>1</sup>H, <sup>13</sup>C and 2D NMR spectra .....(Page 3 to 71)

### **General Information:**

Proton and carbon NMR spectra were obtained on 400 MHz NMR spectrometer. Chemical shifts are reported as  $\delta$  values in parts per million (ppm) as referenced to residual solvent.  $^1\text{H}$  NMR spectra are tabulated as follows: chemical shift, multiplicity (s = singlet, bs = broad singlet, d = doublet, t = triplet, q = quartet, m = multiplet), coupling constant(s), and number of protons.

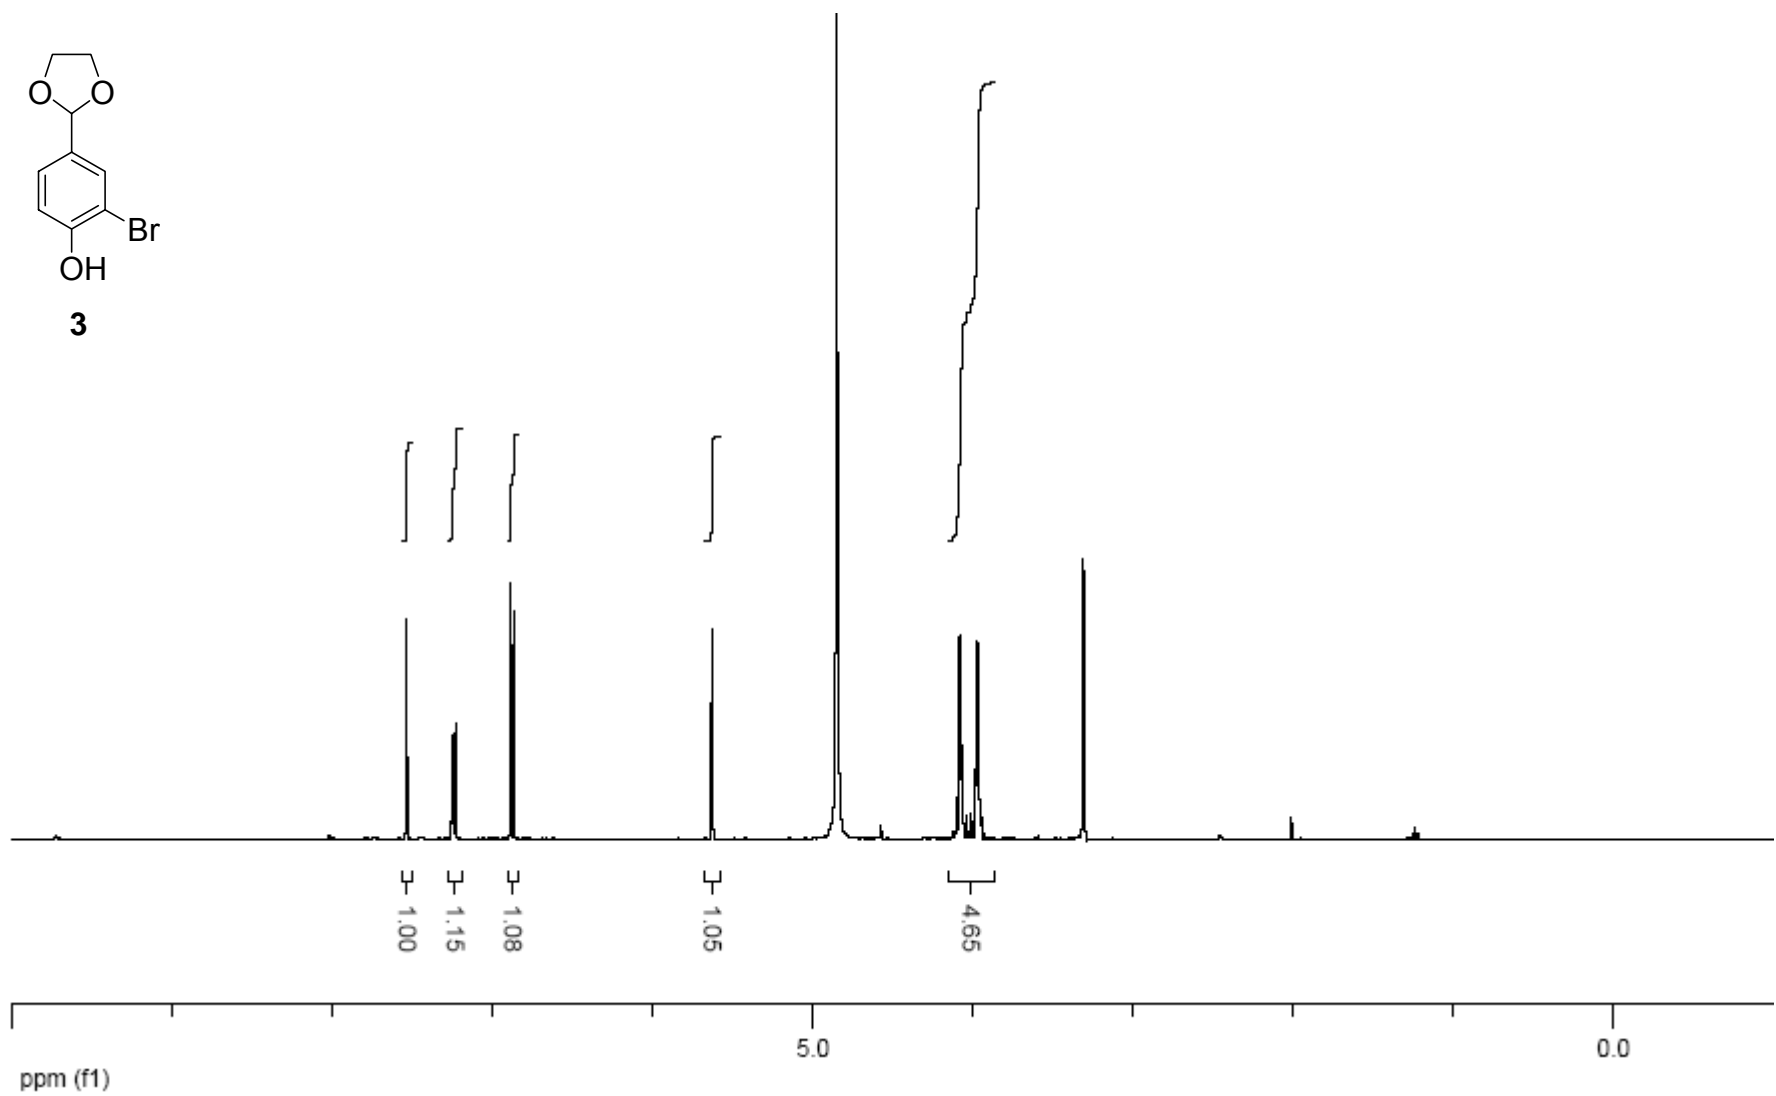

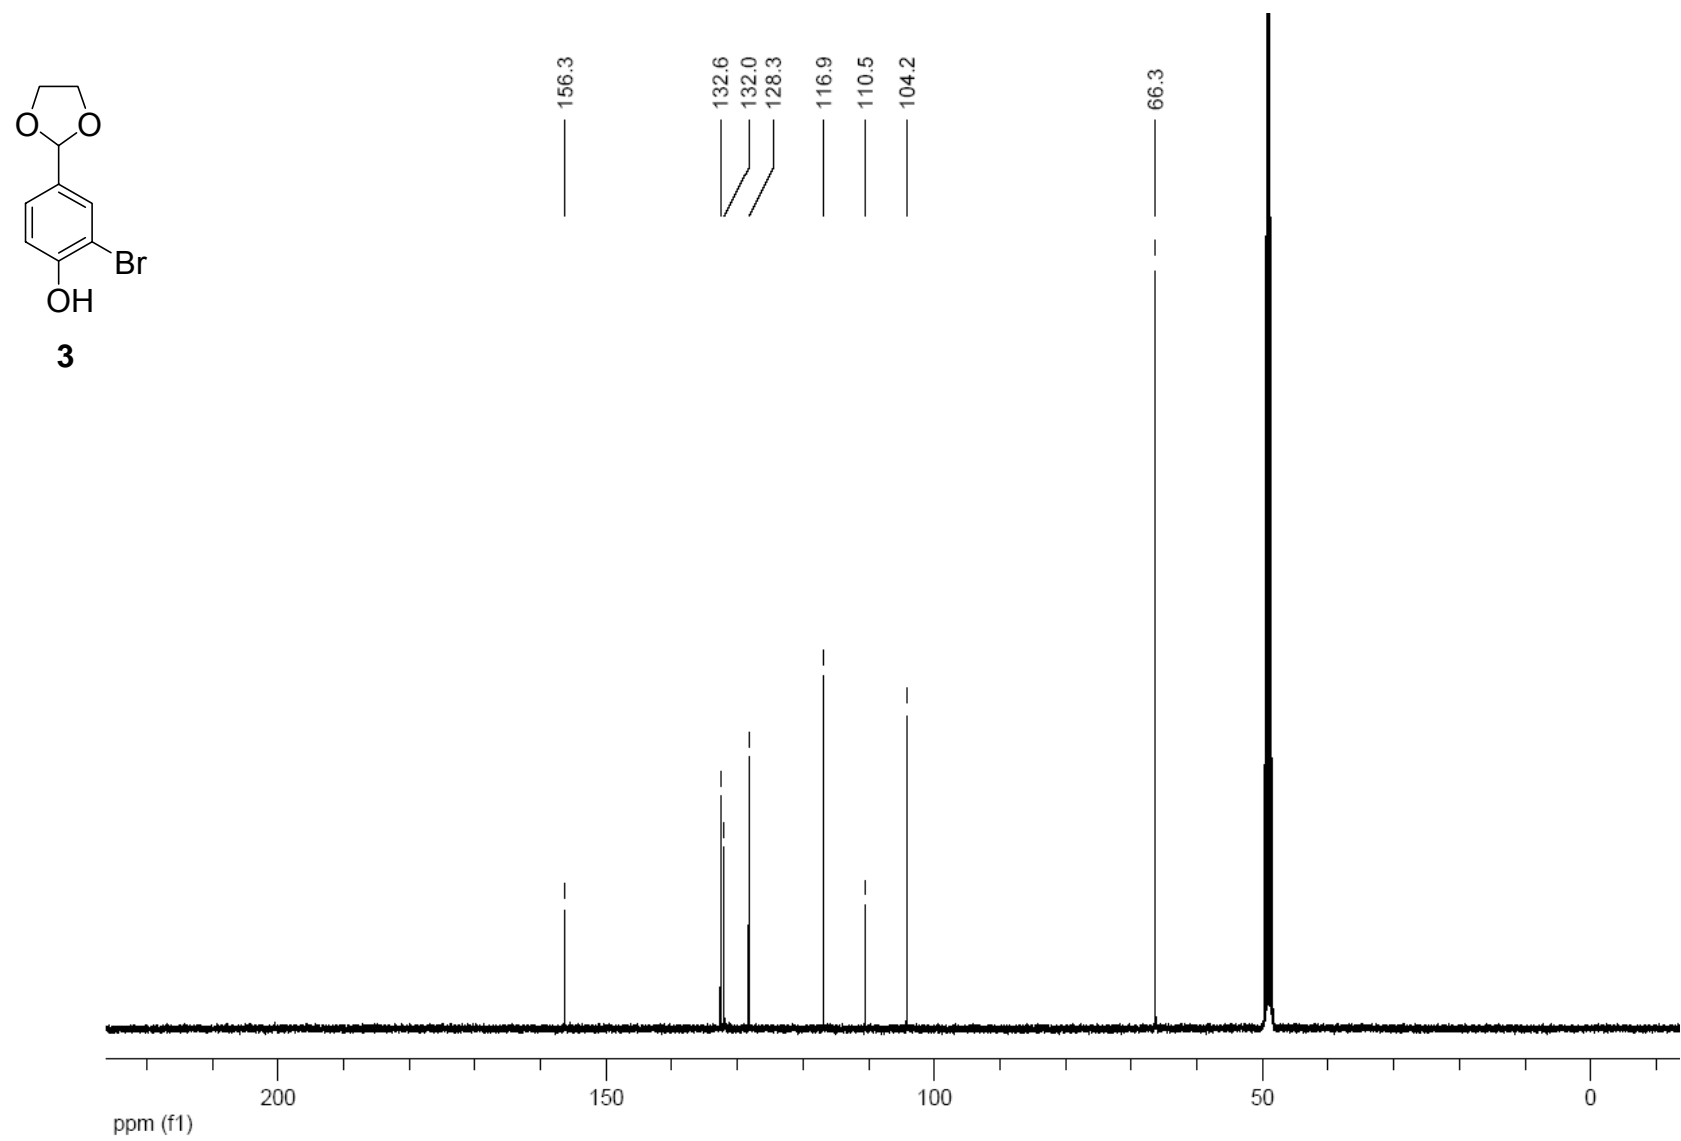

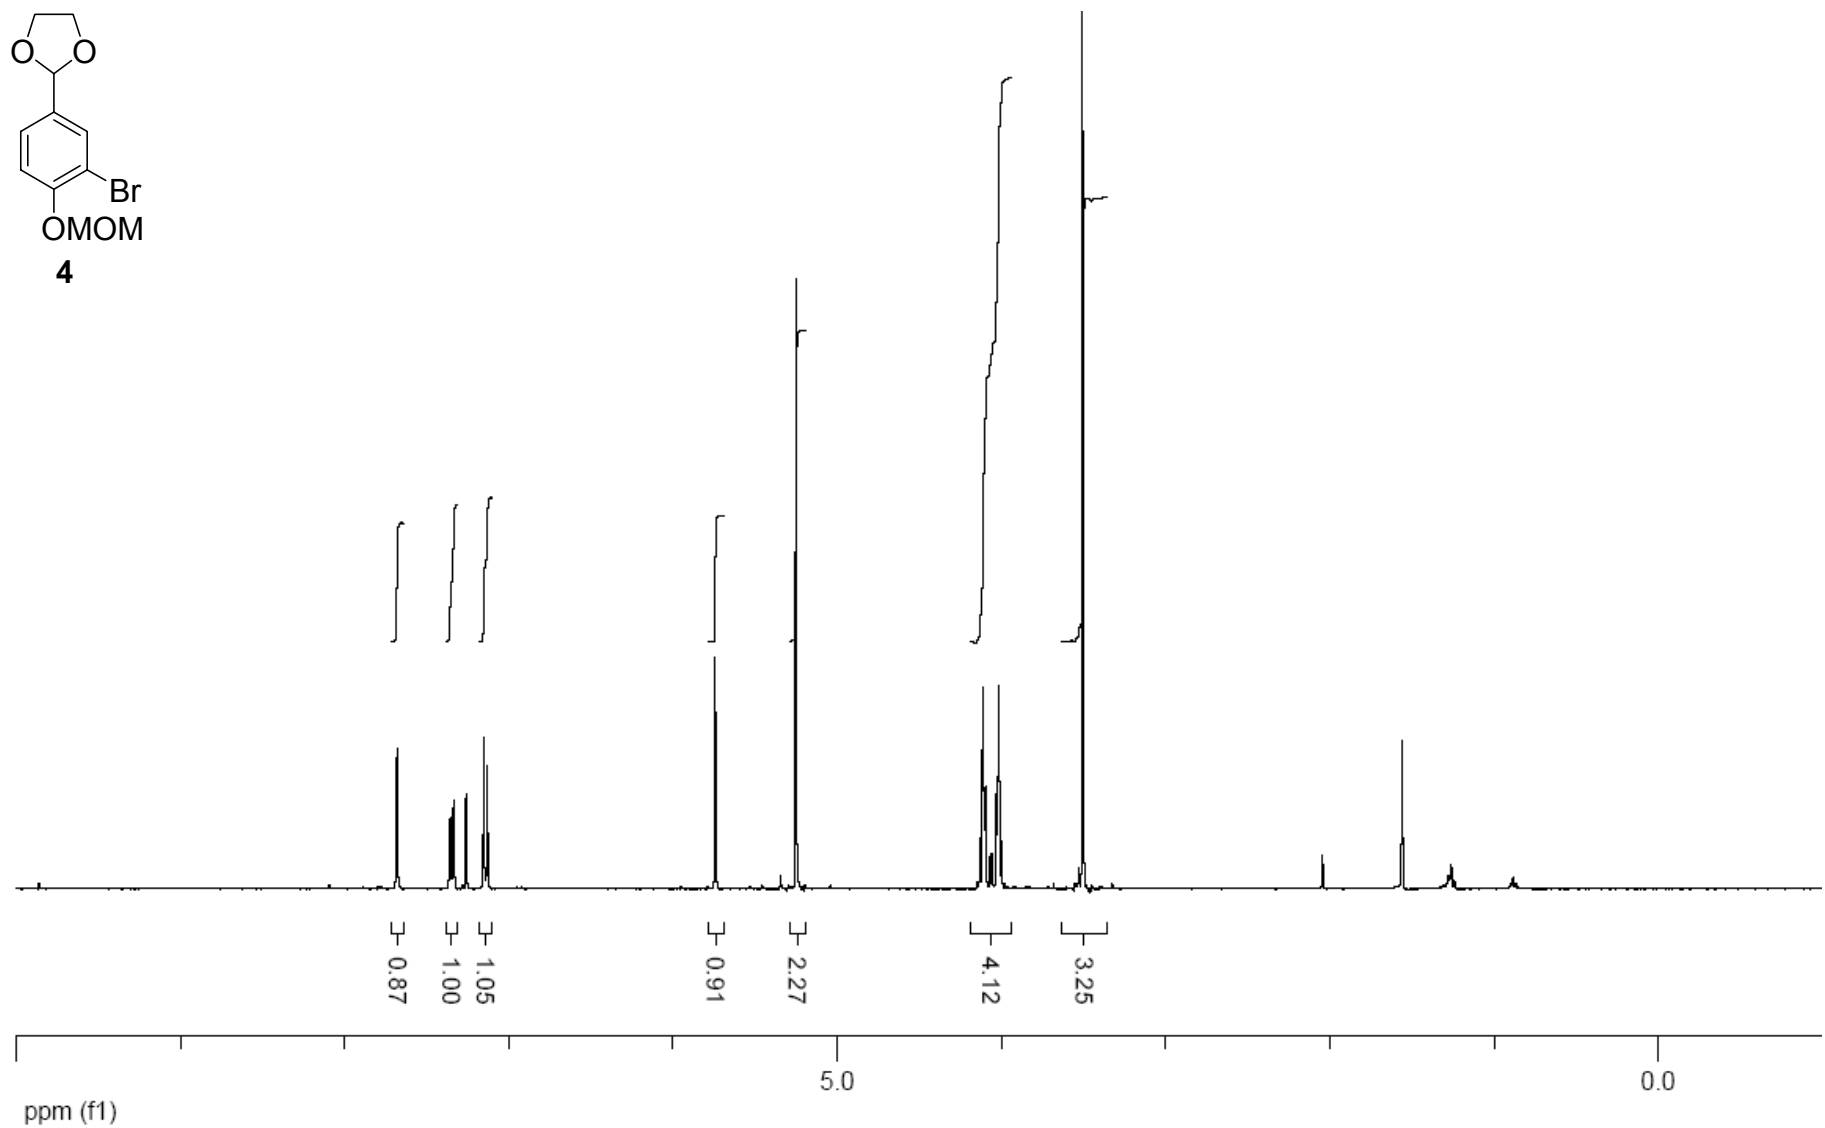

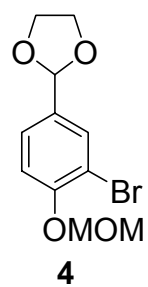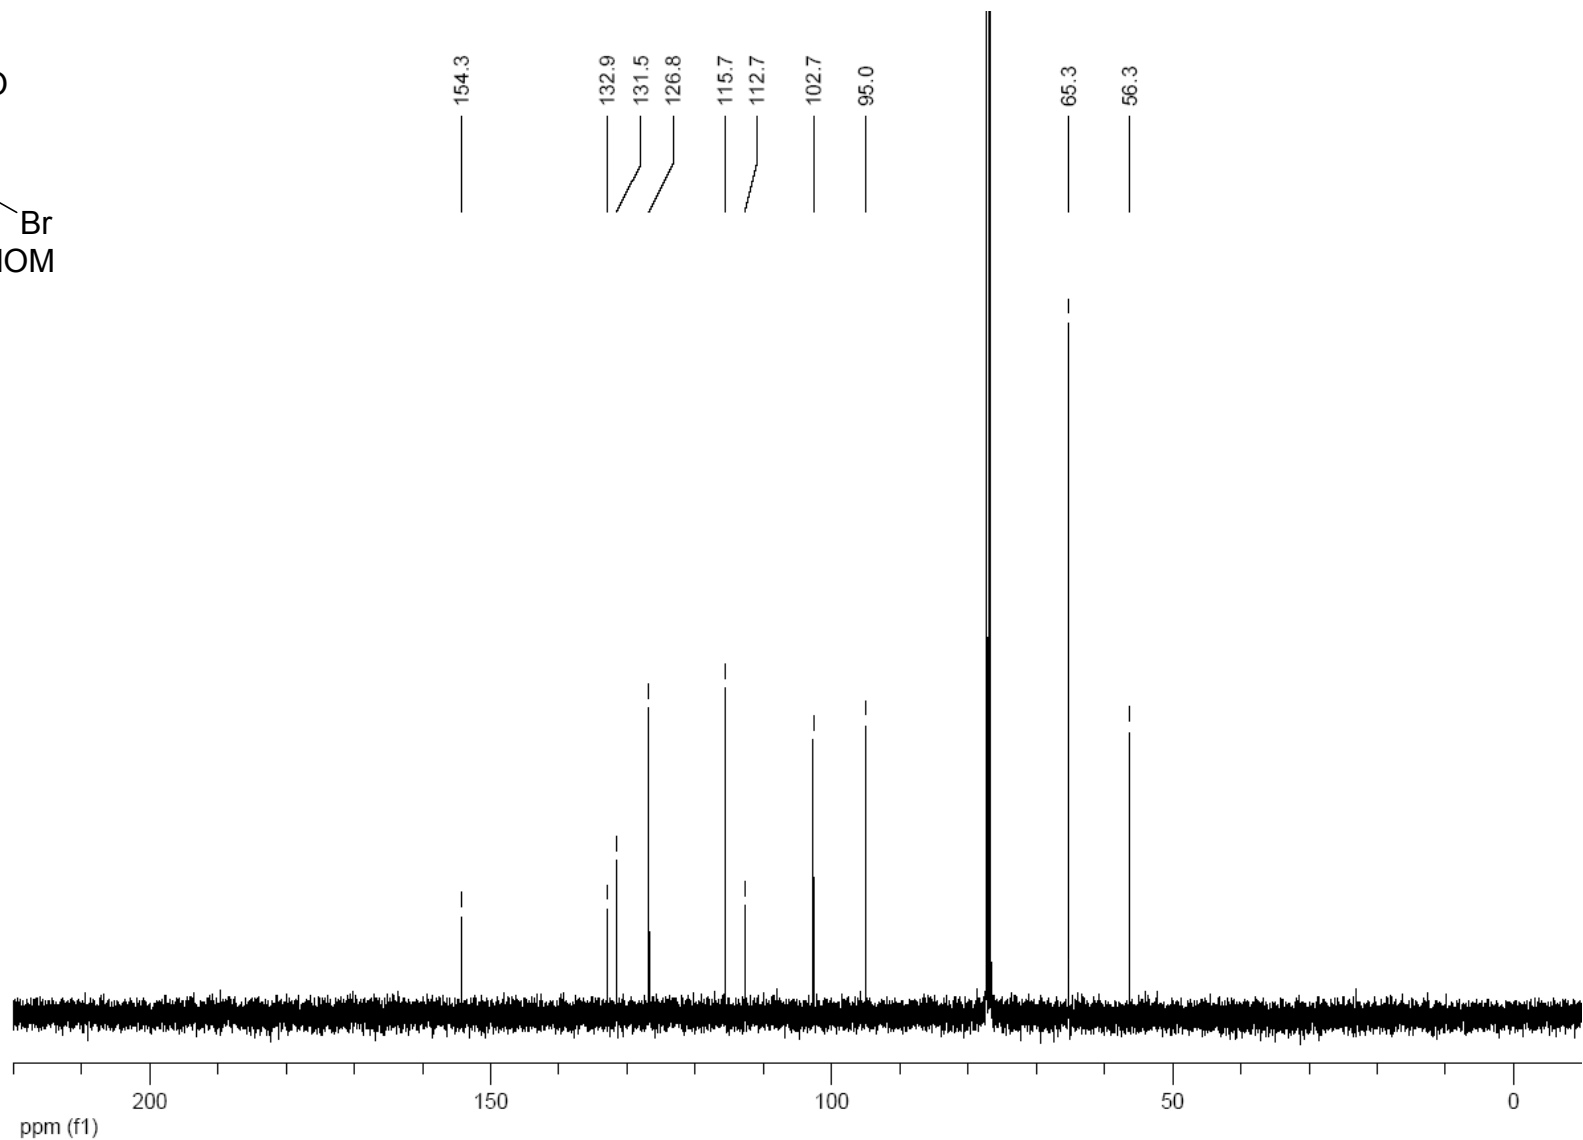

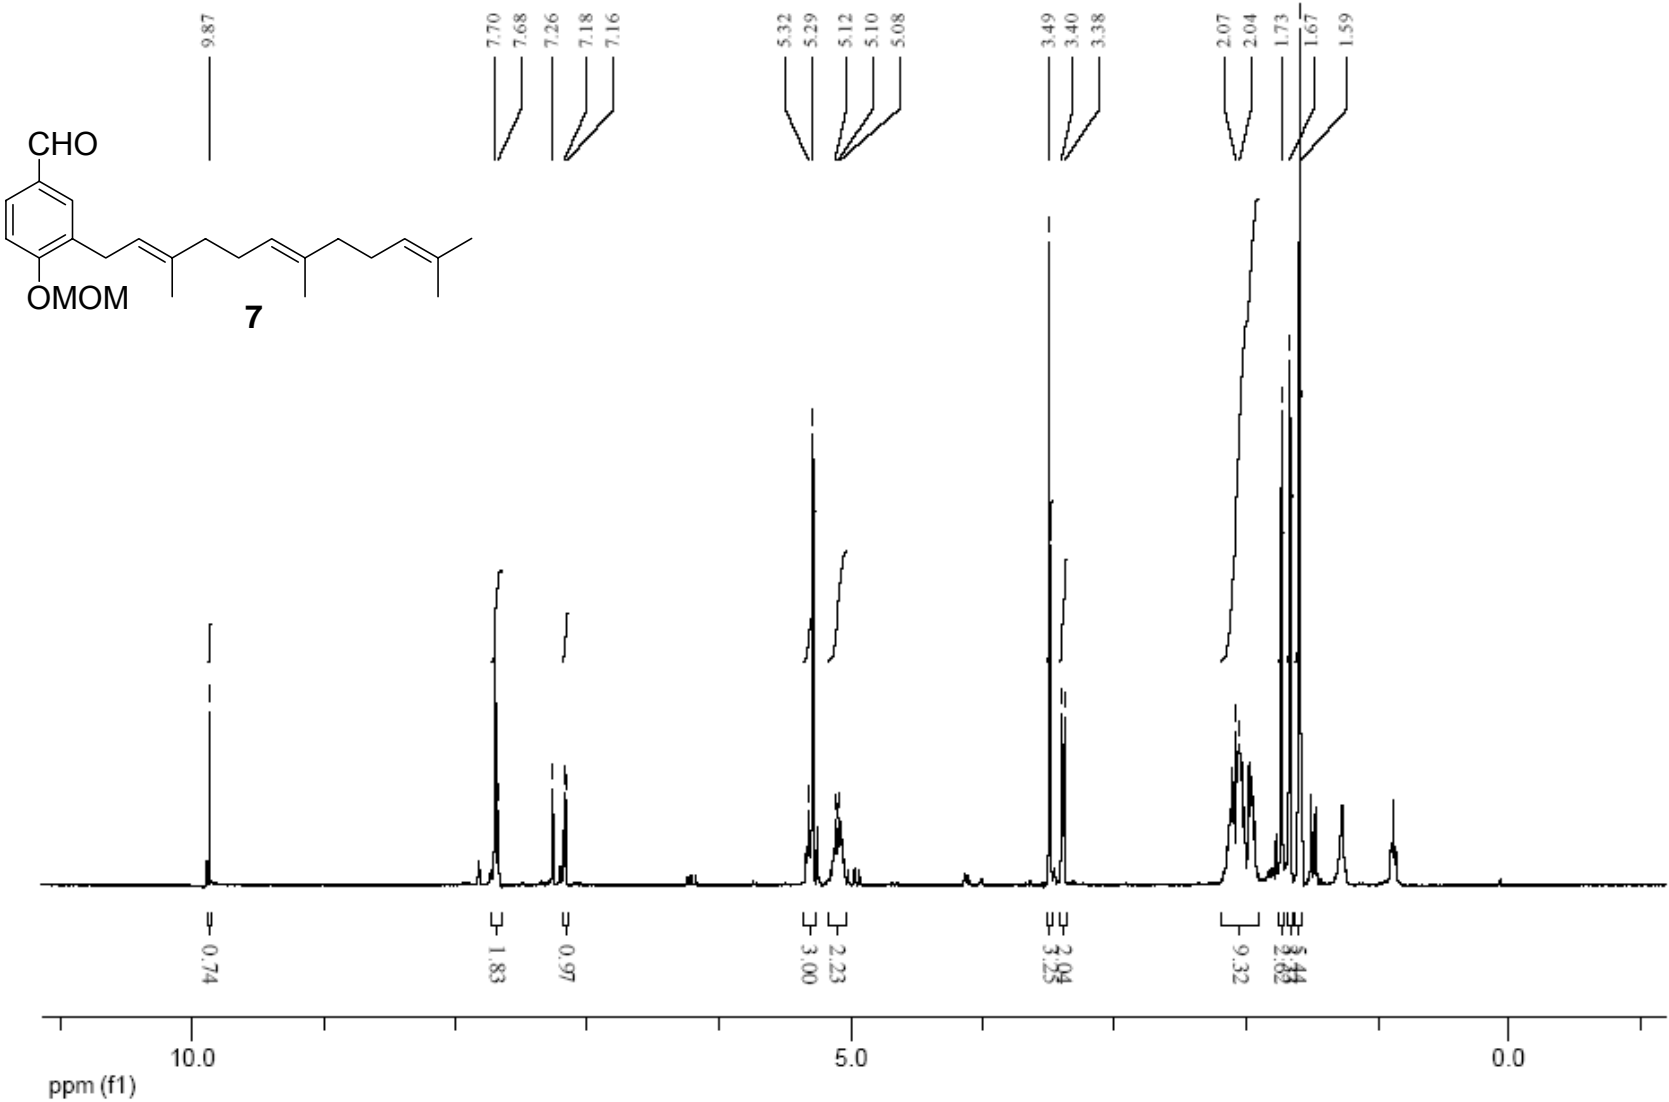

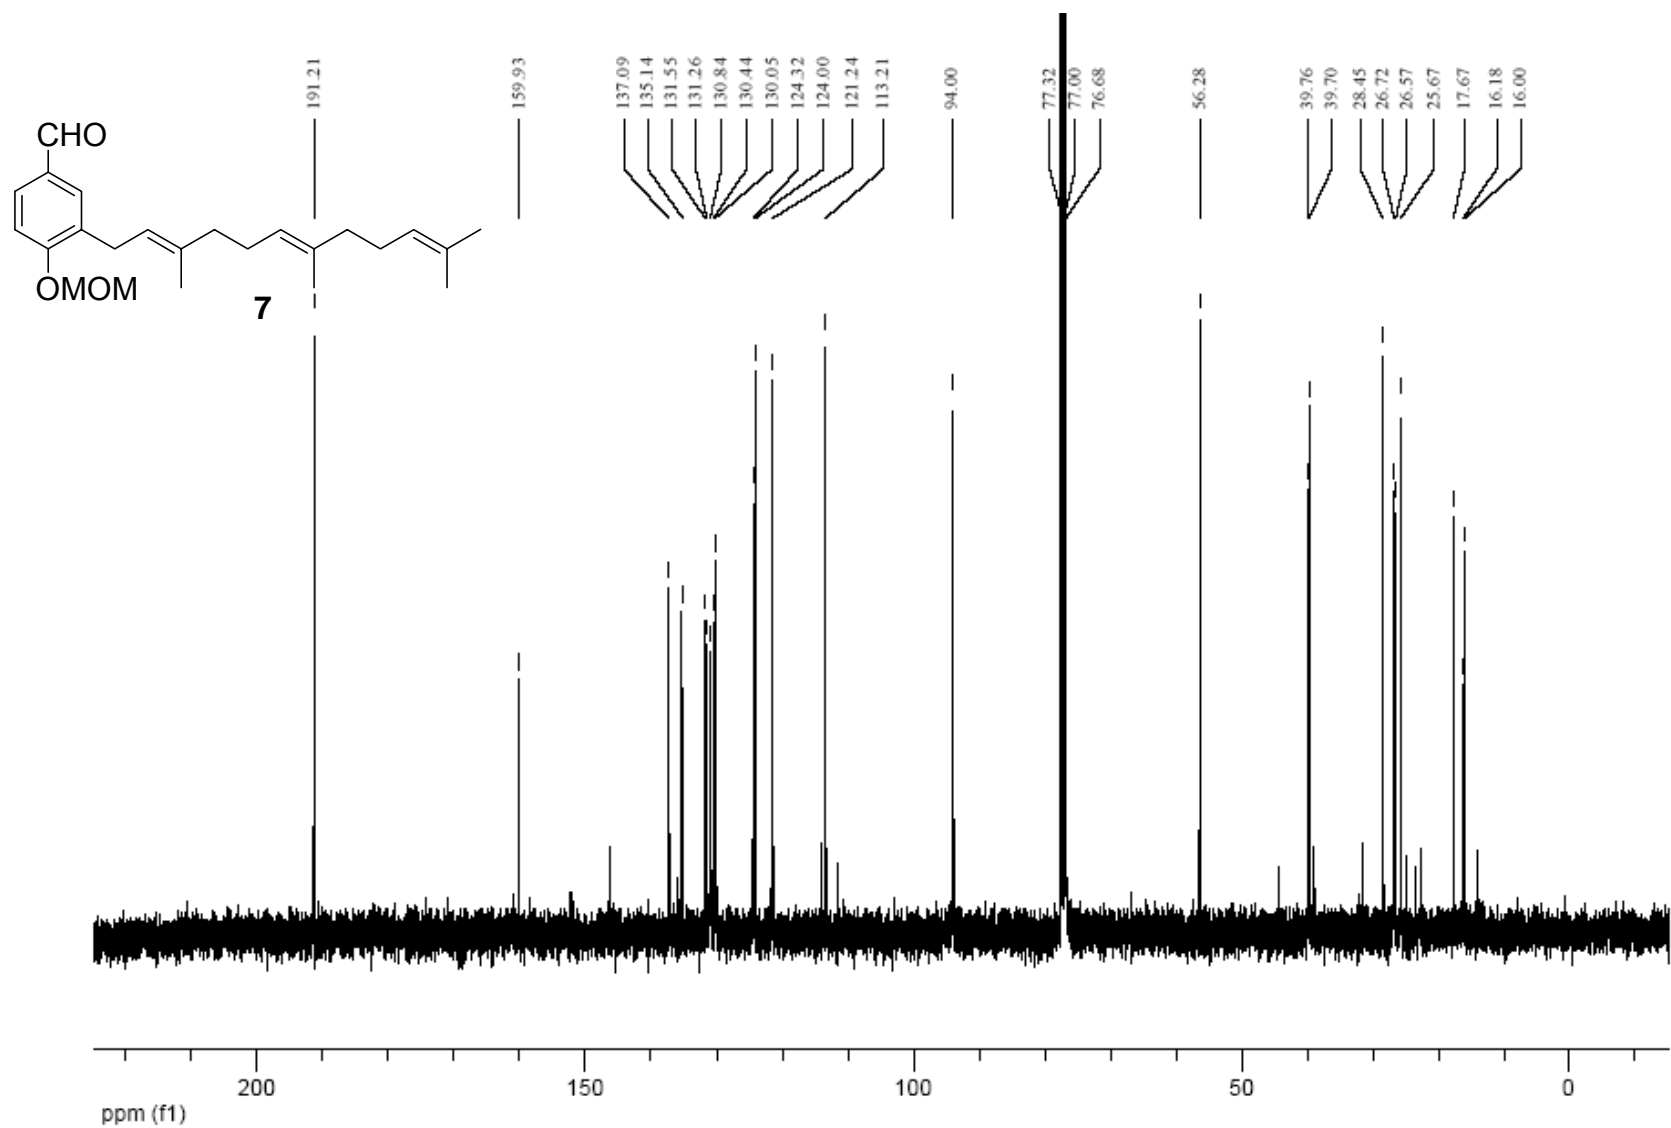



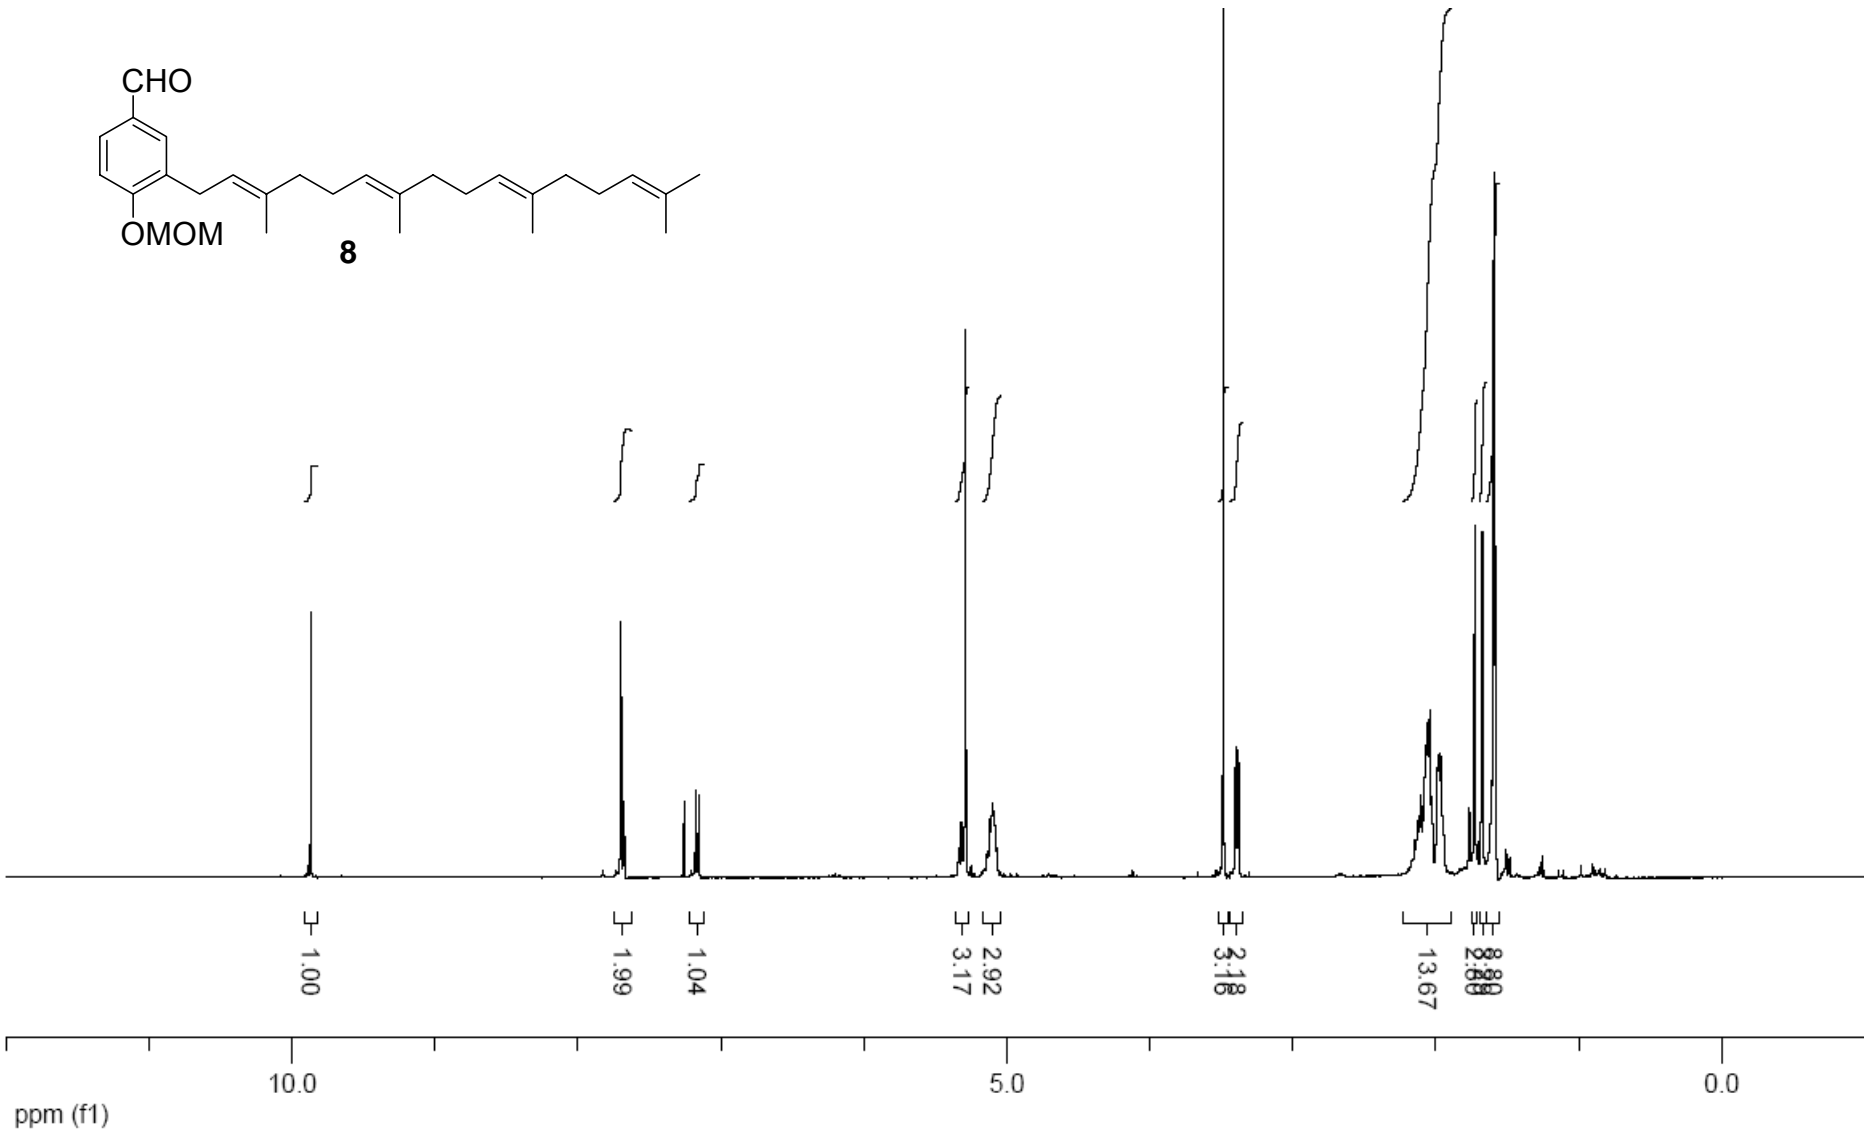

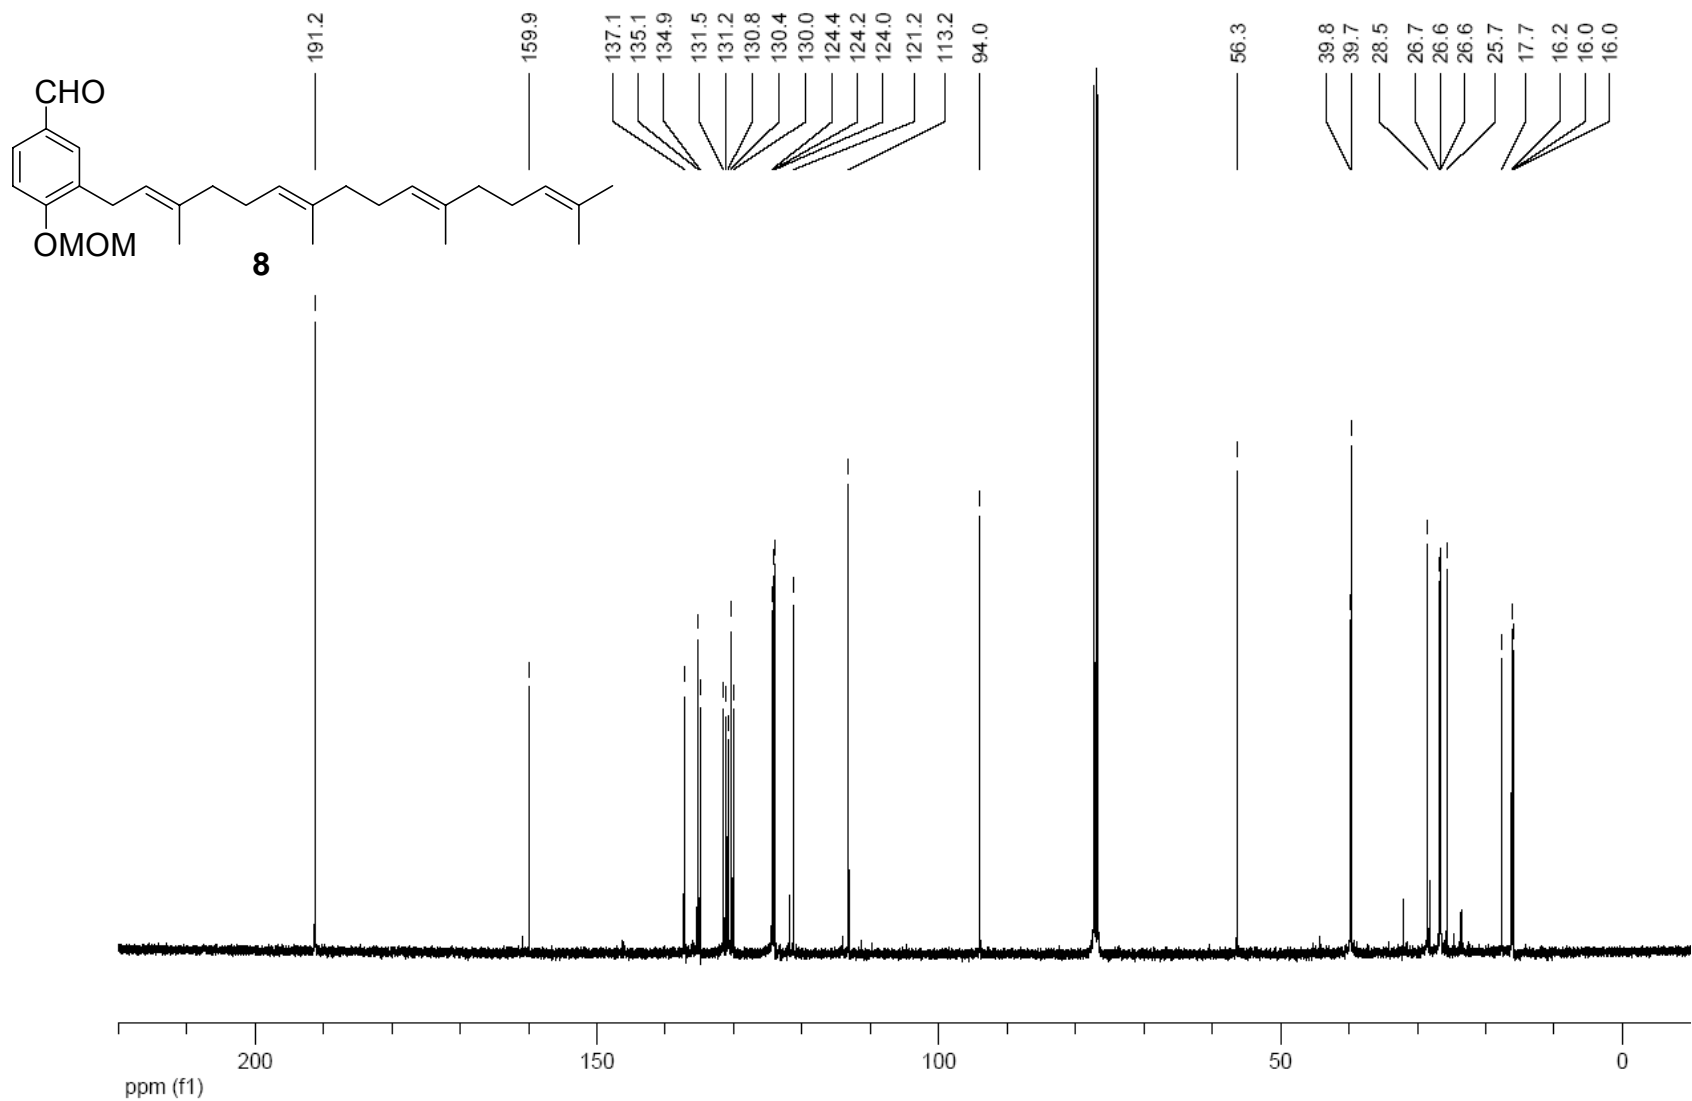

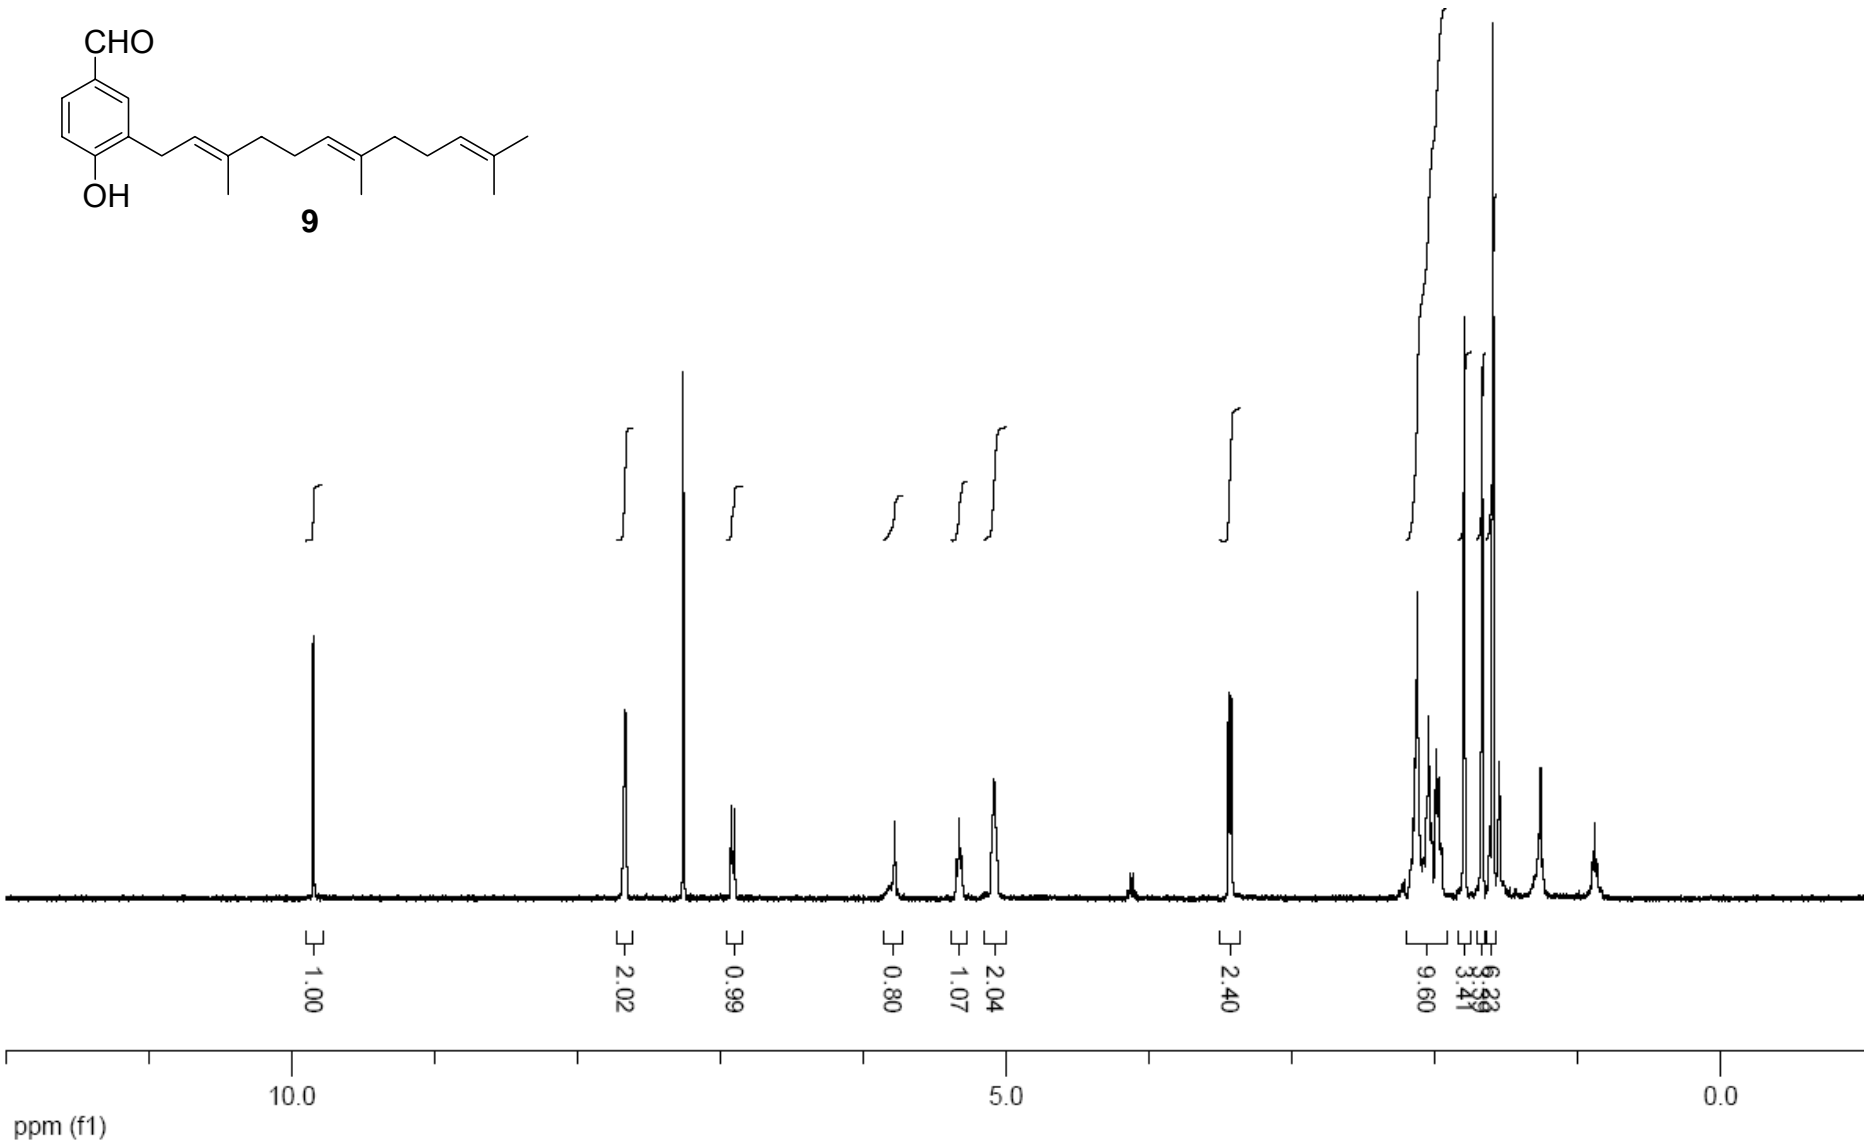

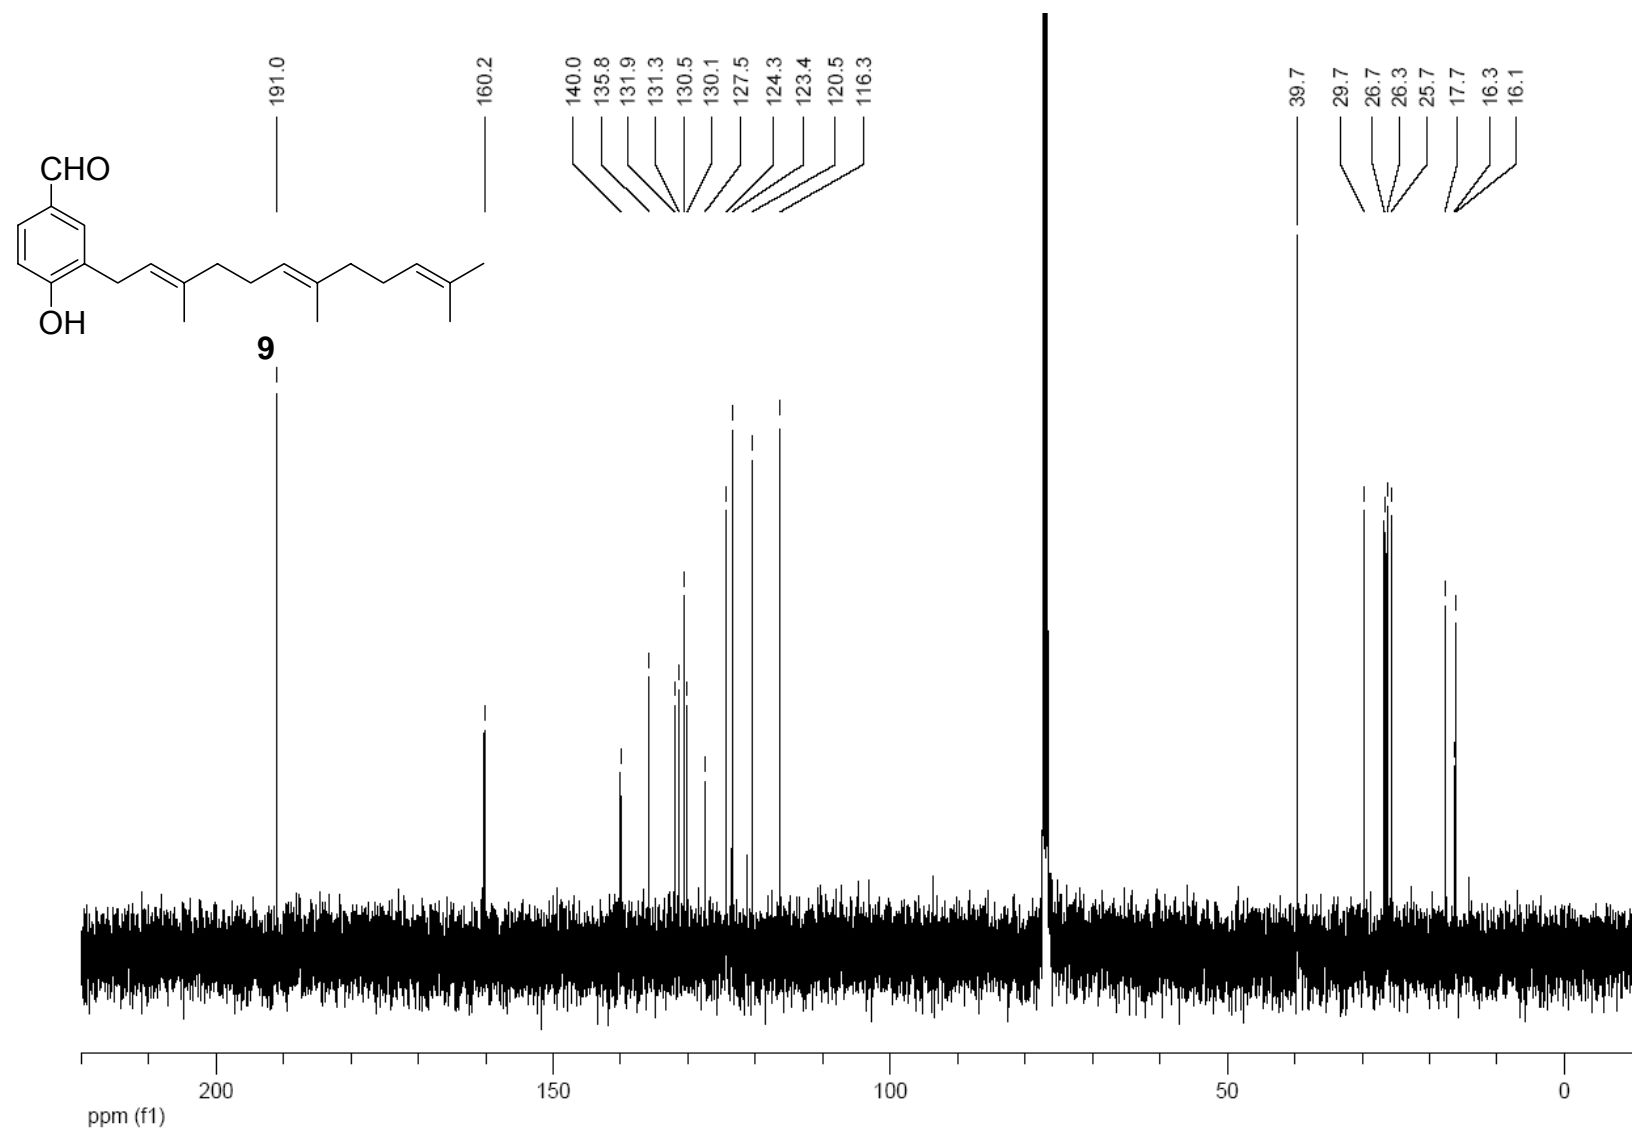

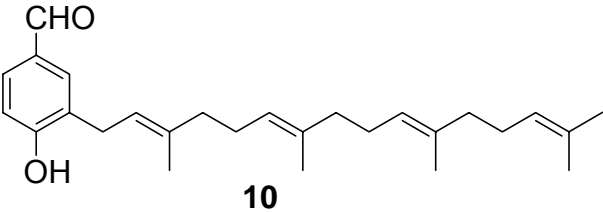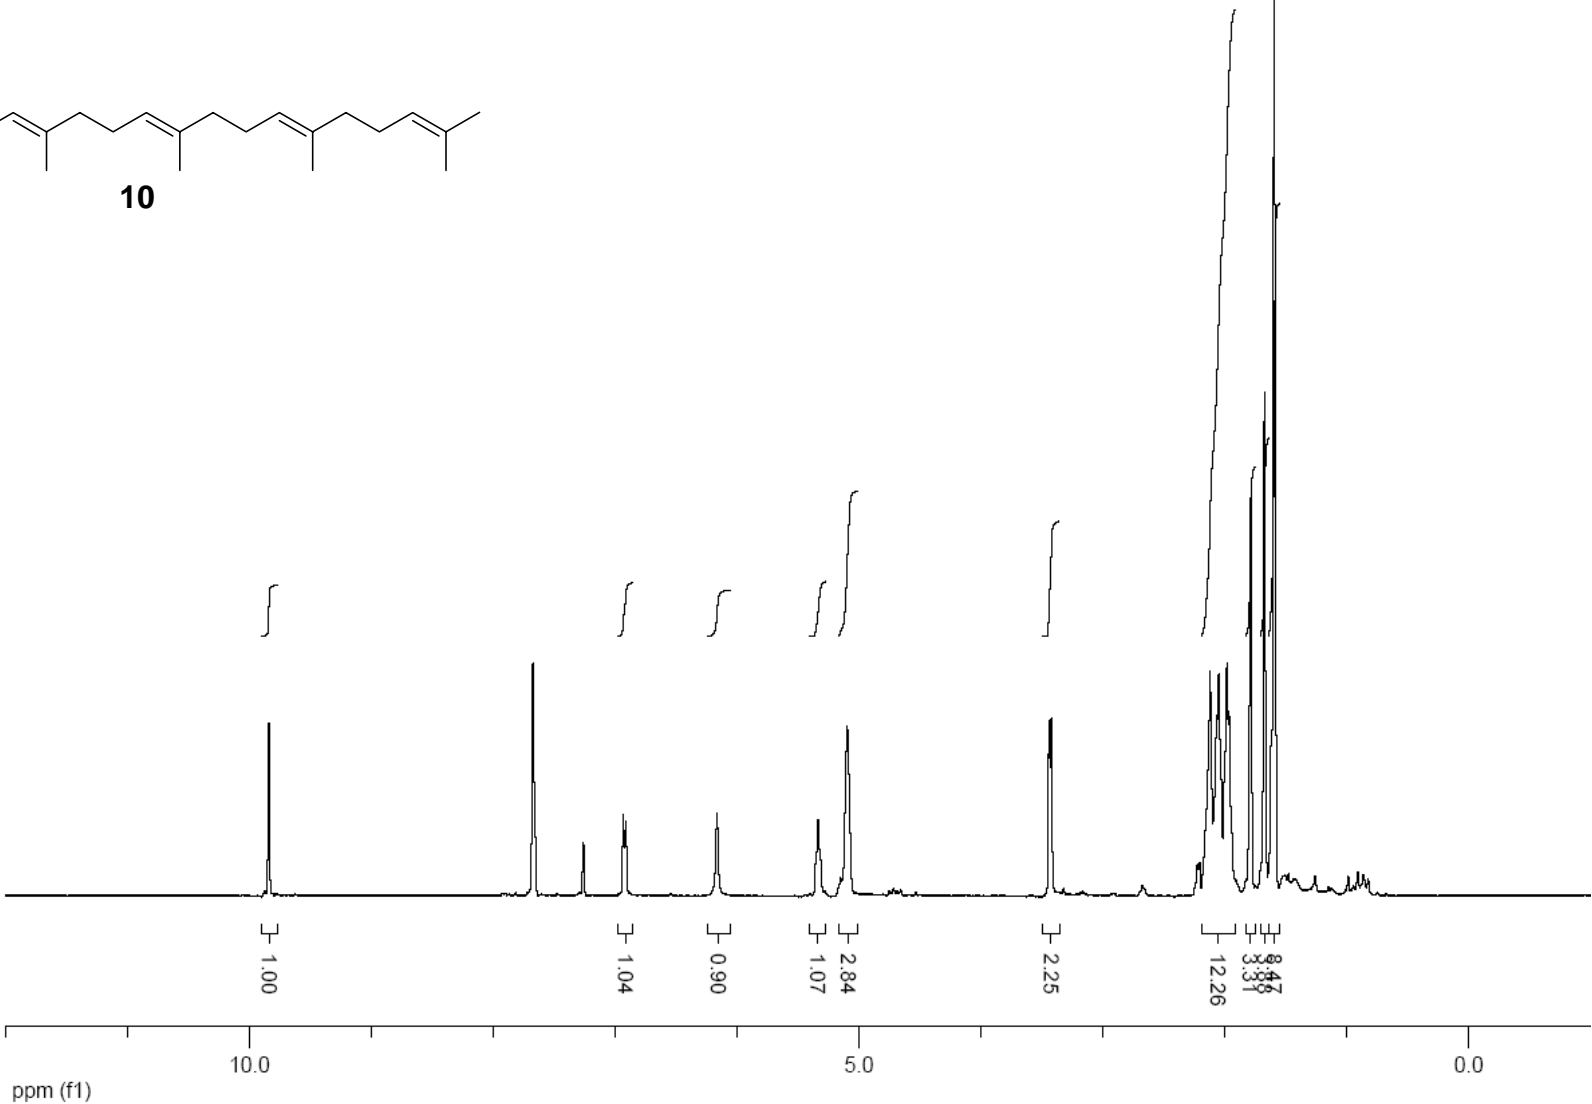

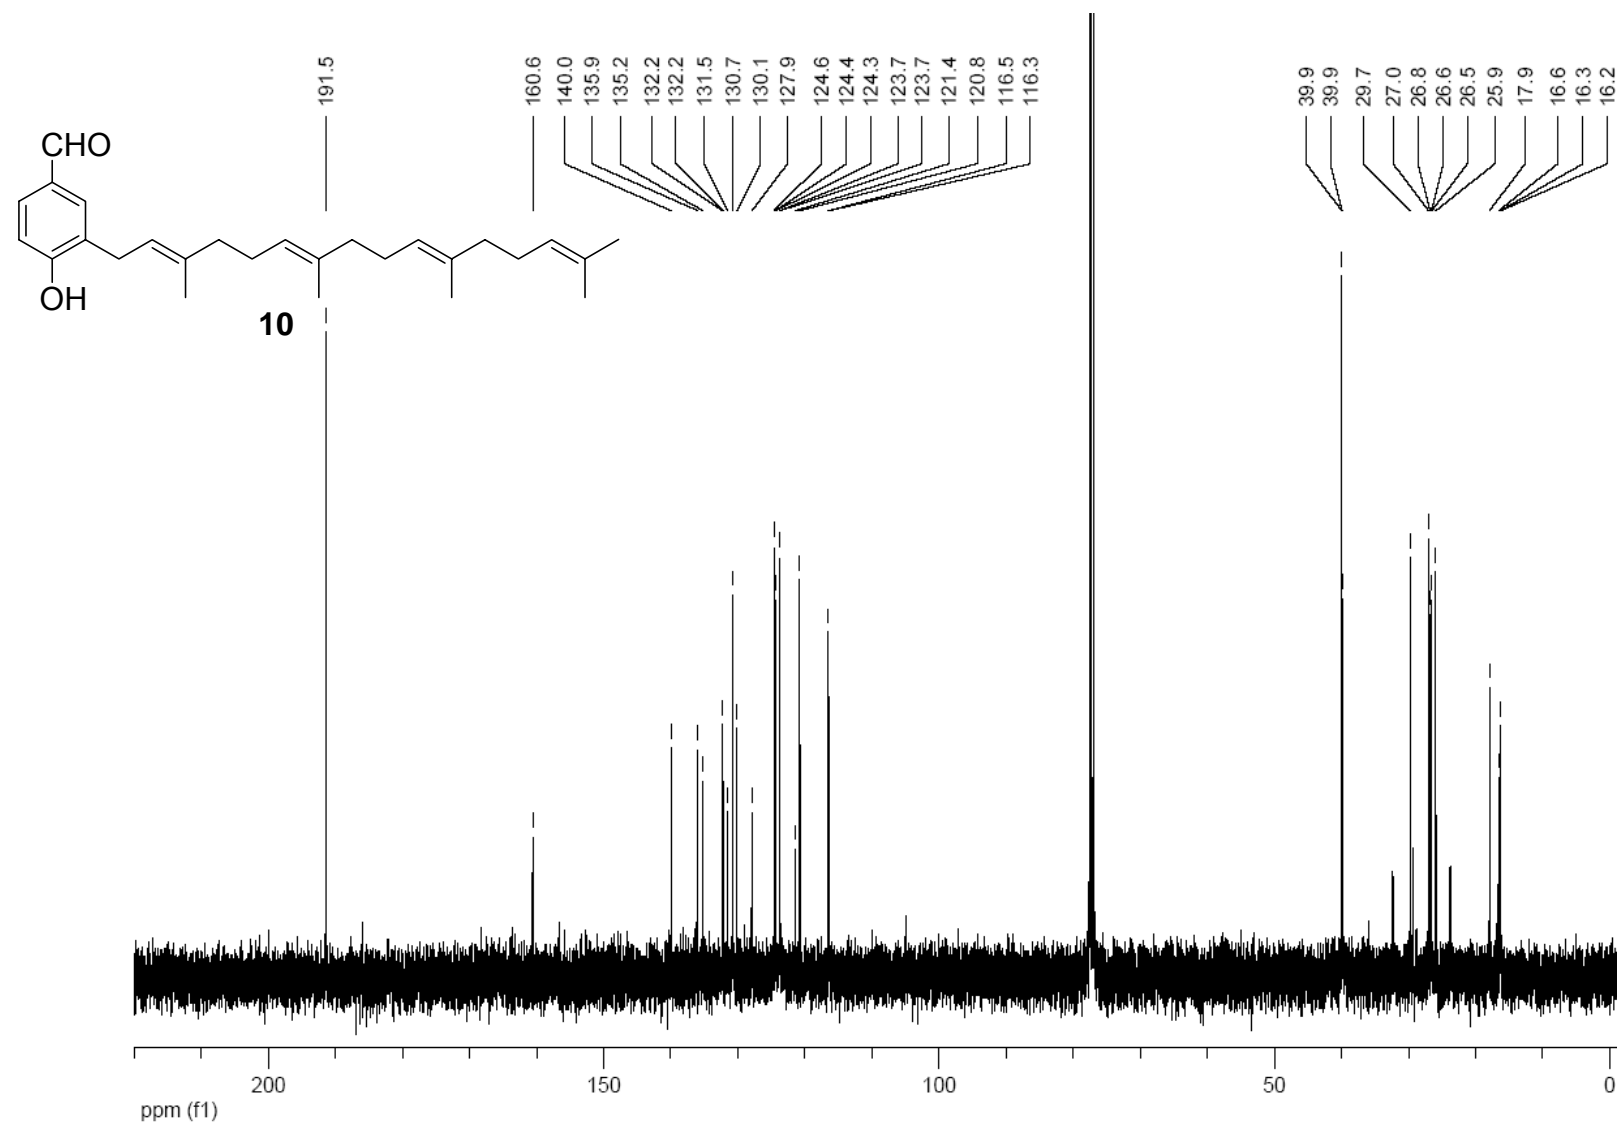

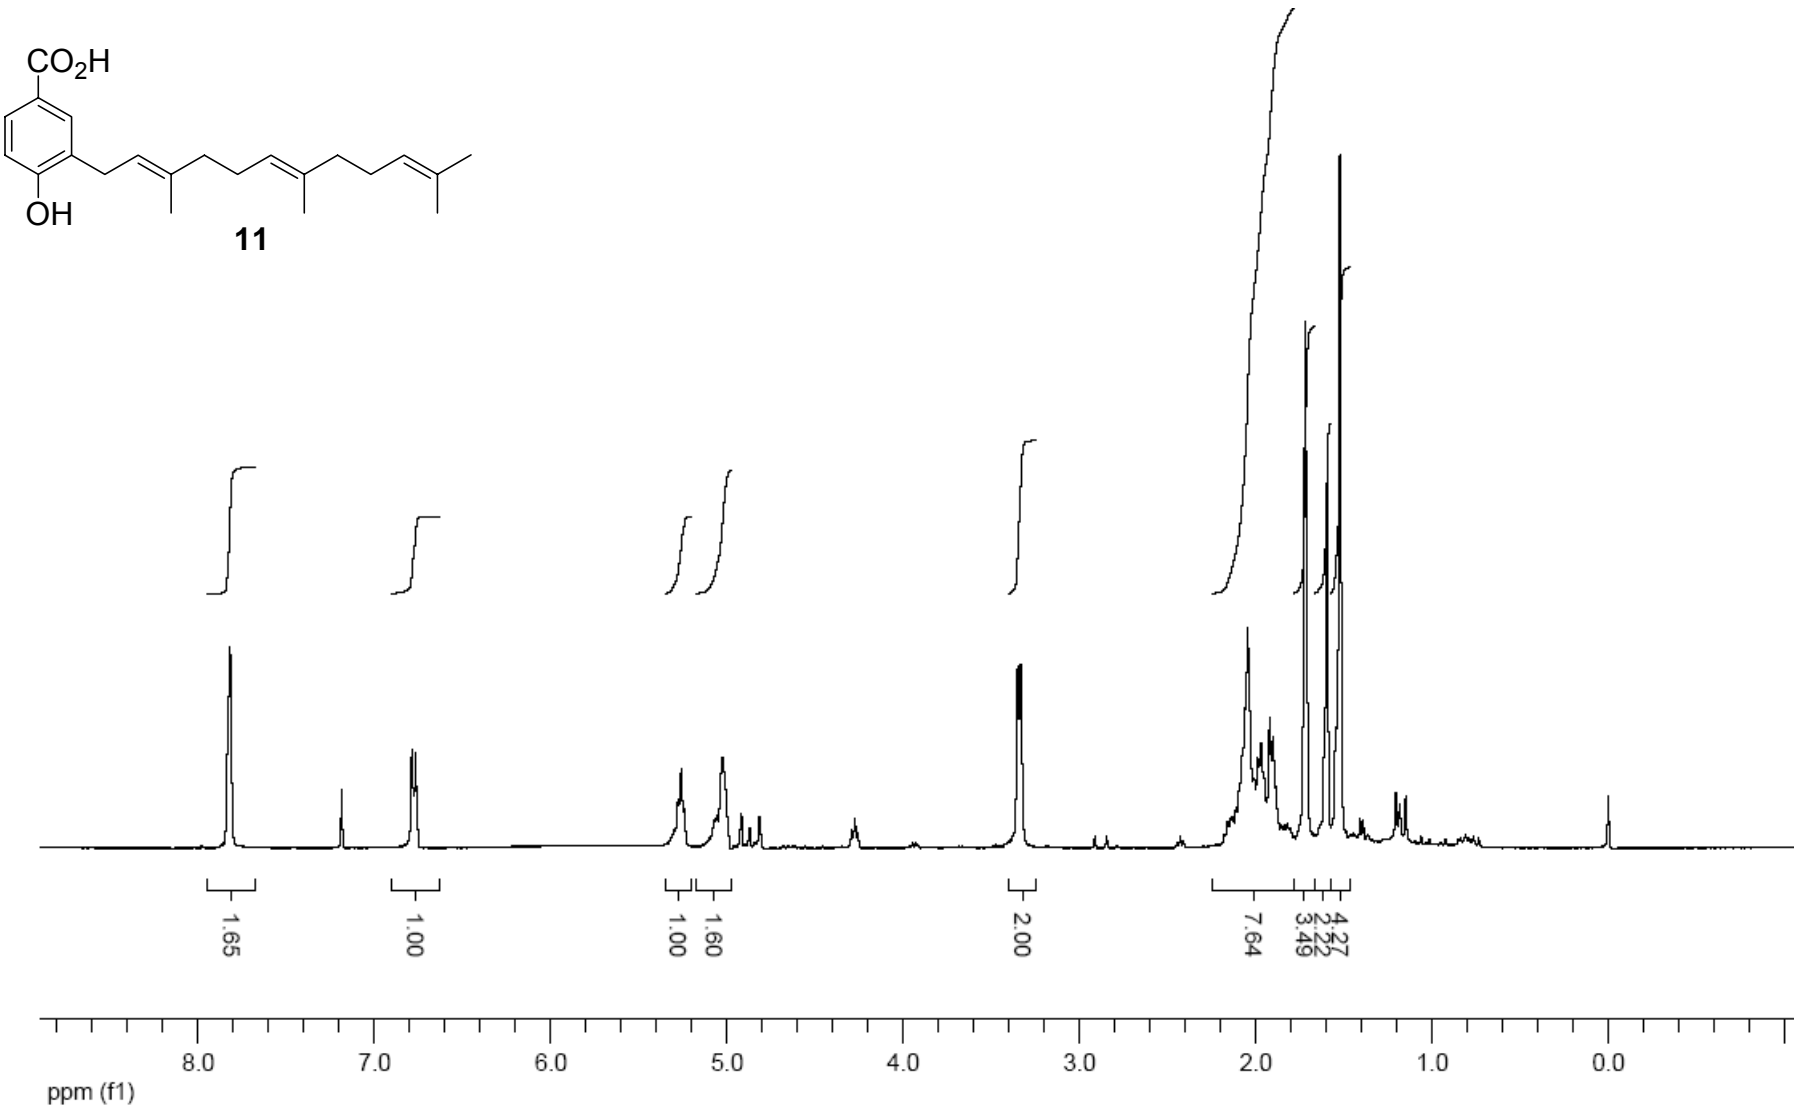

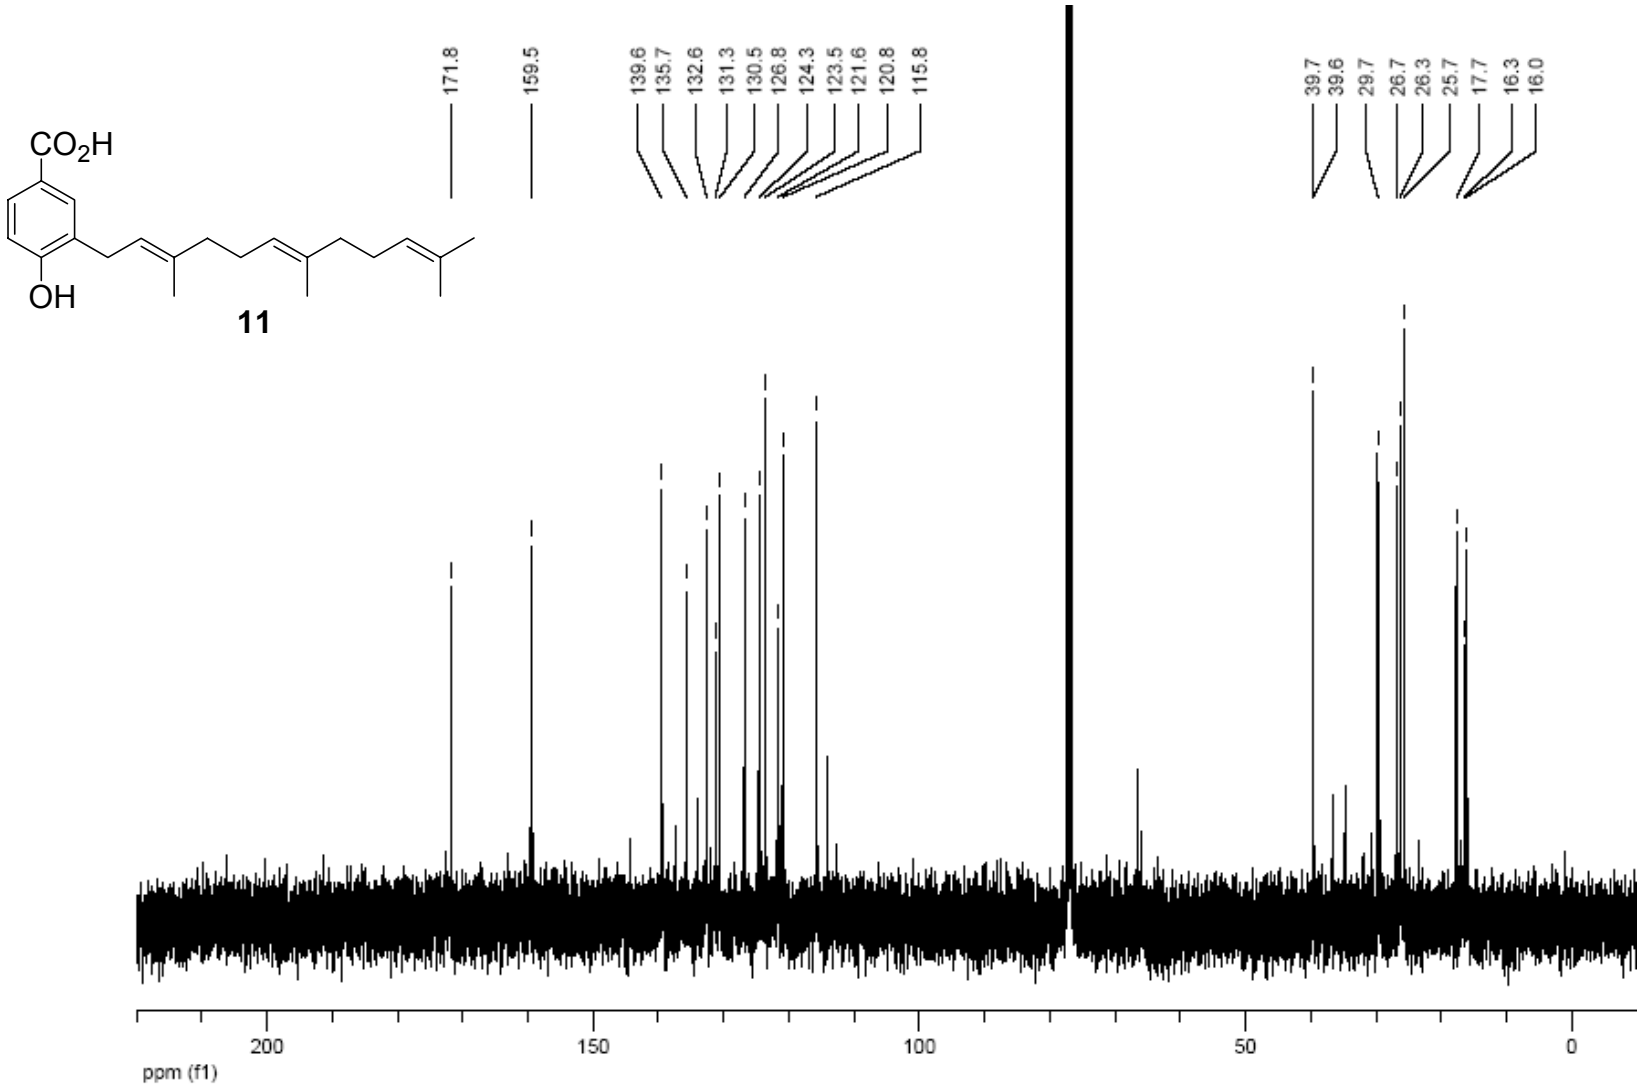



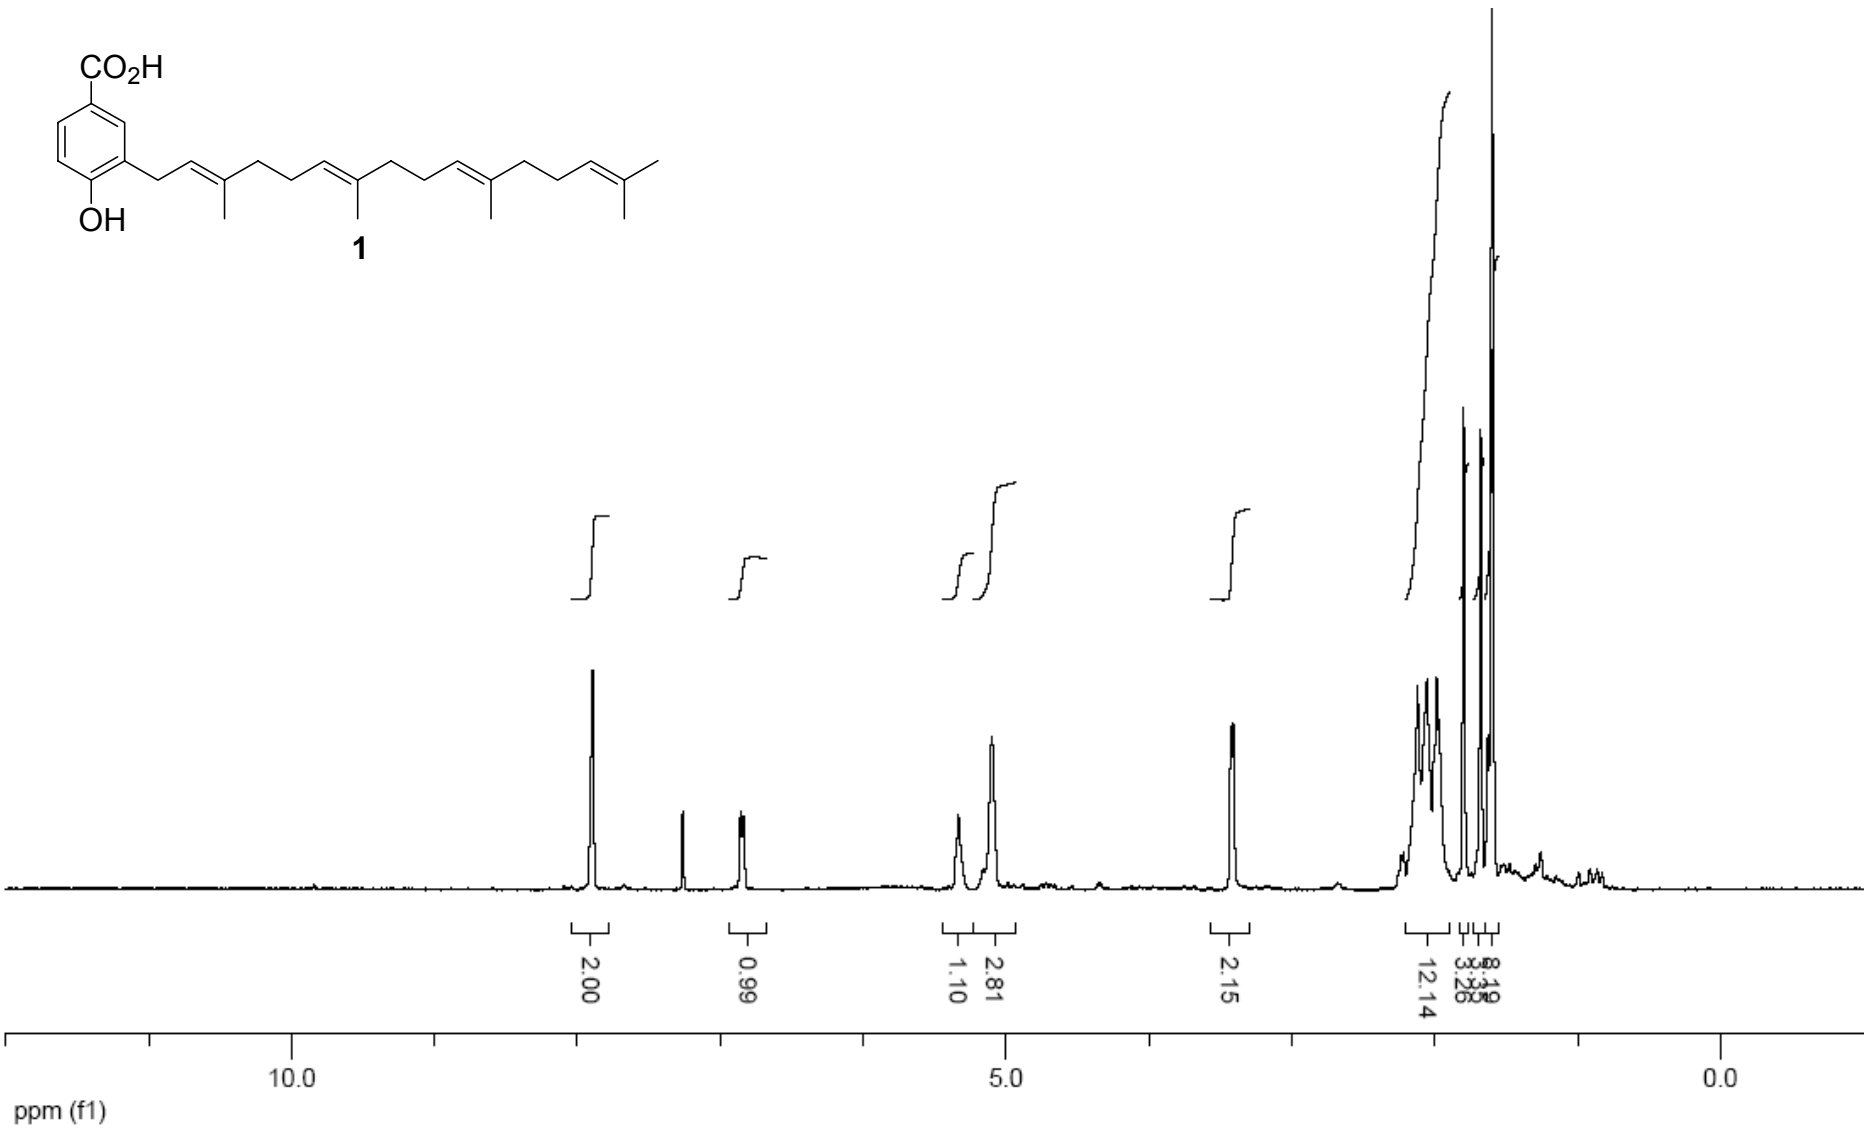

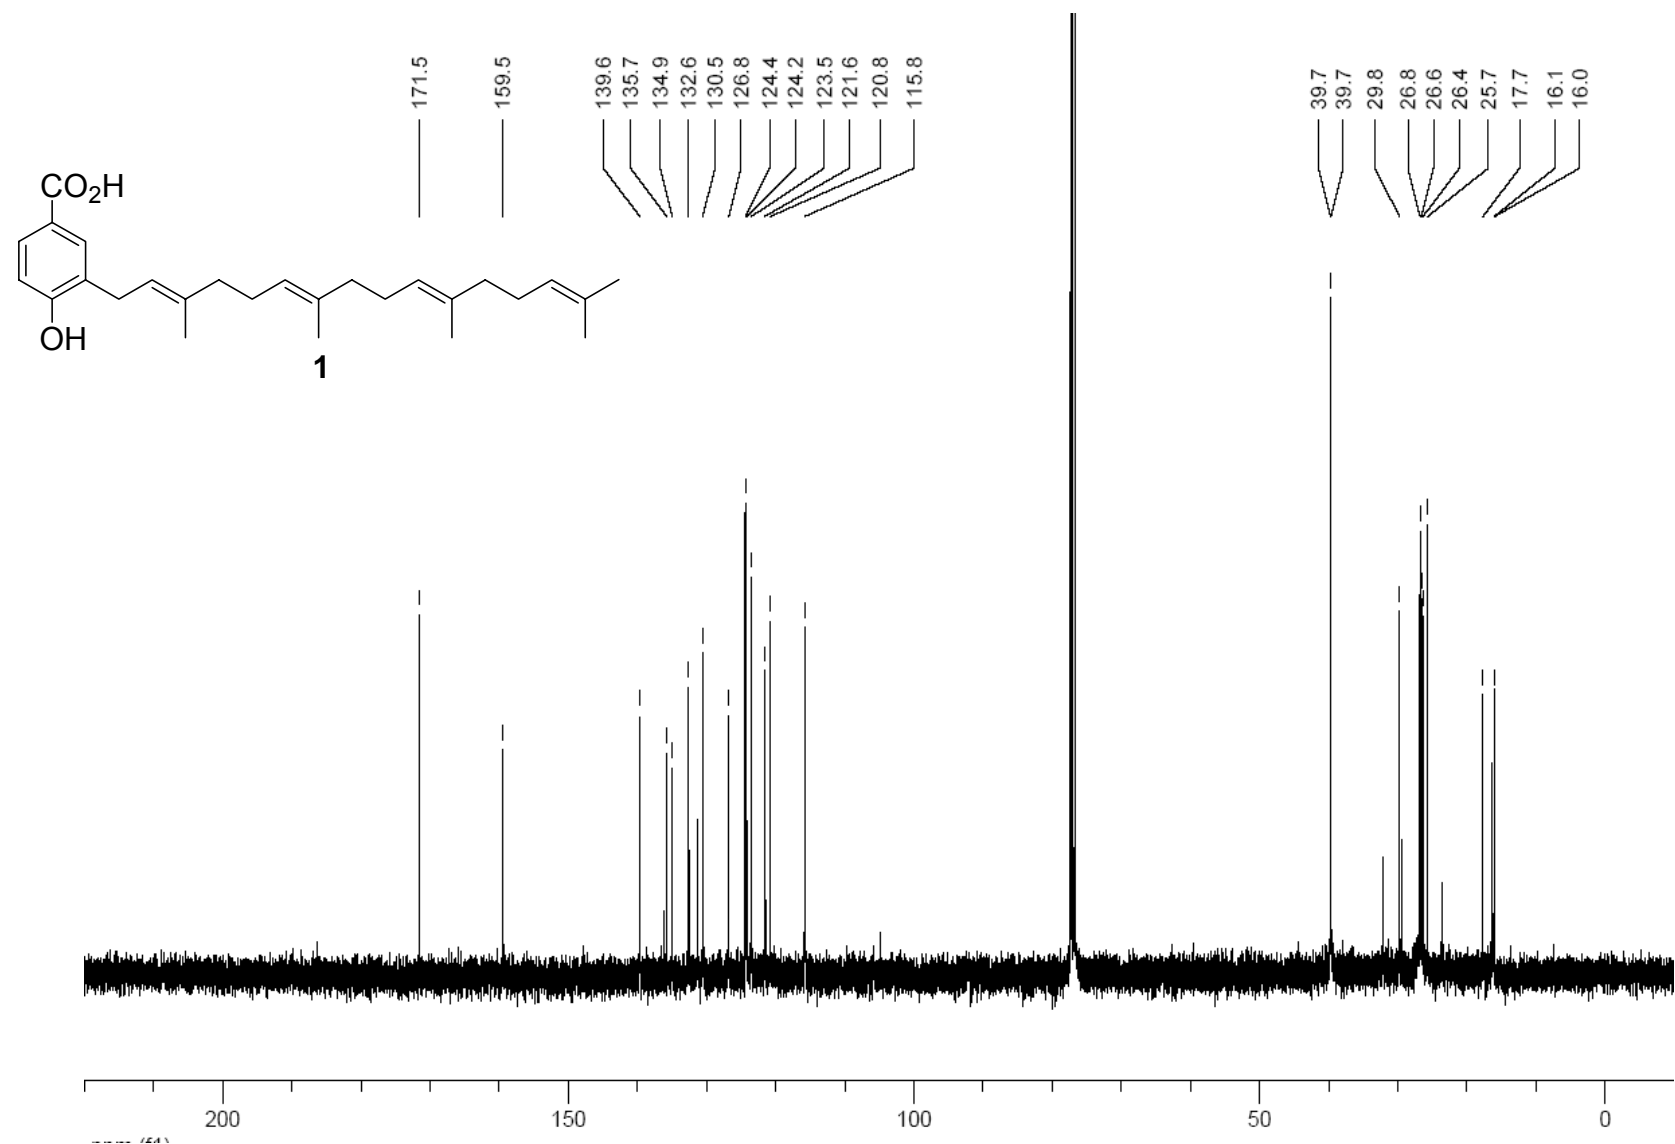

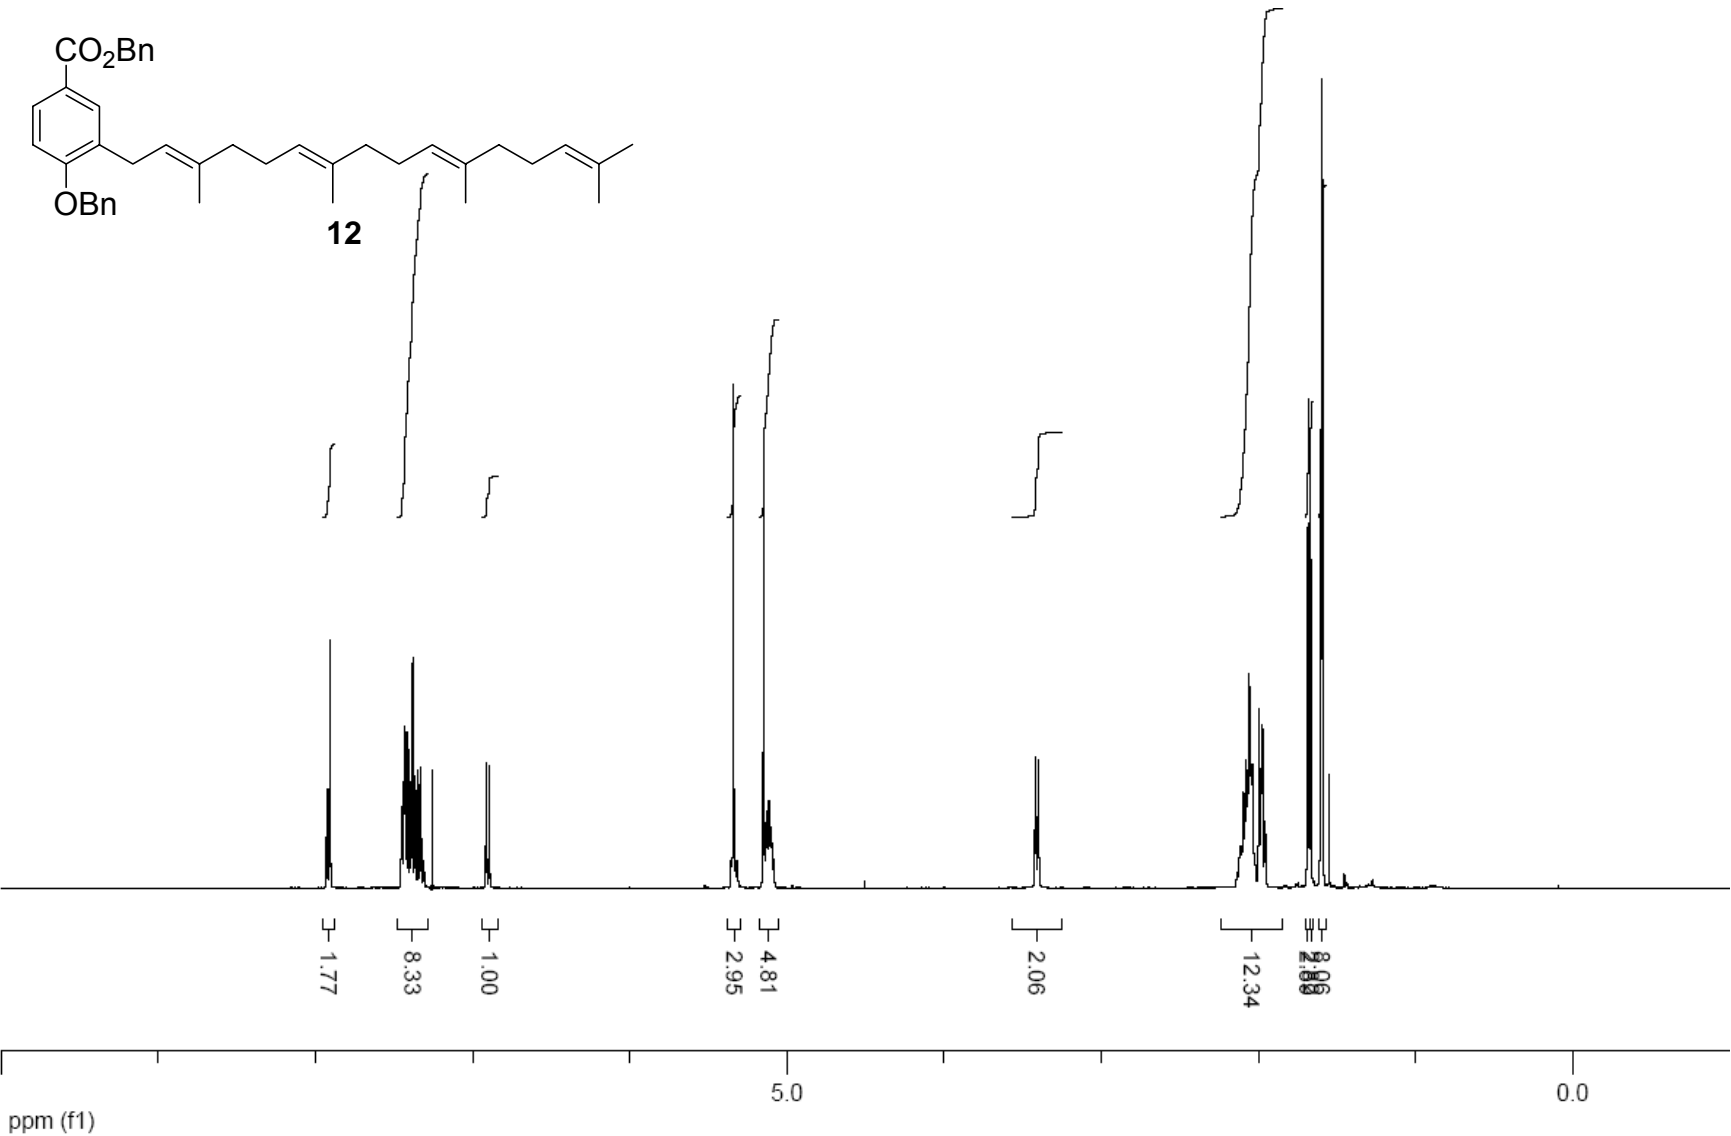

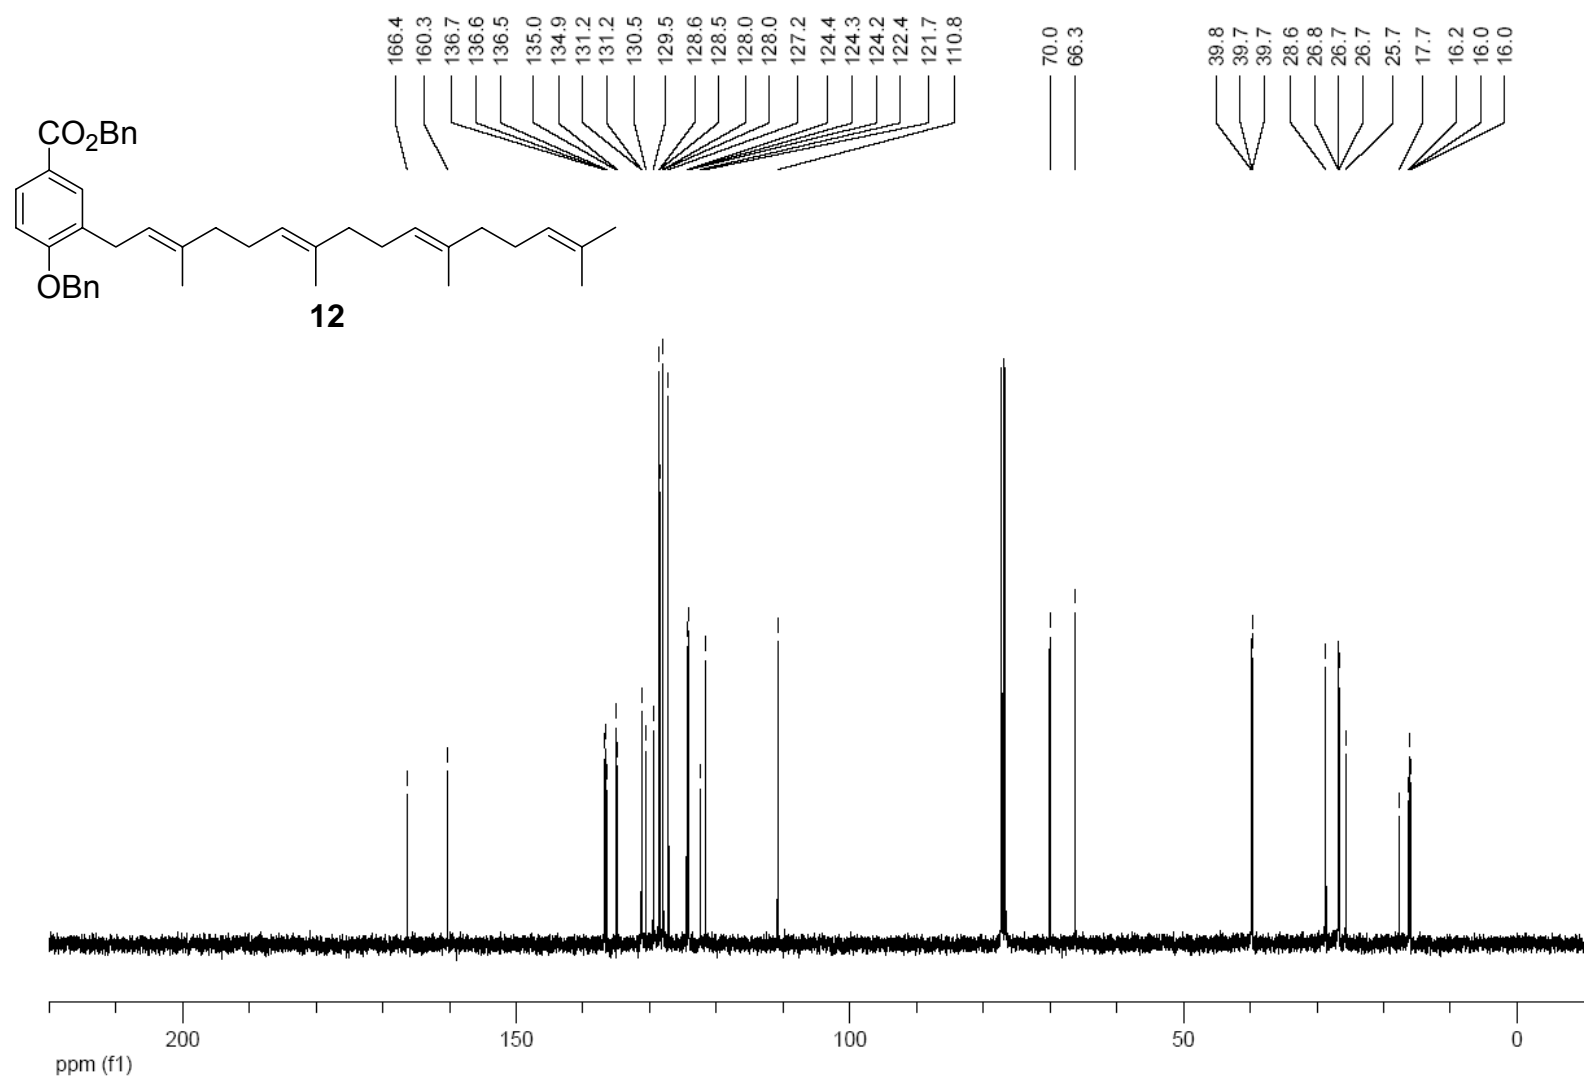

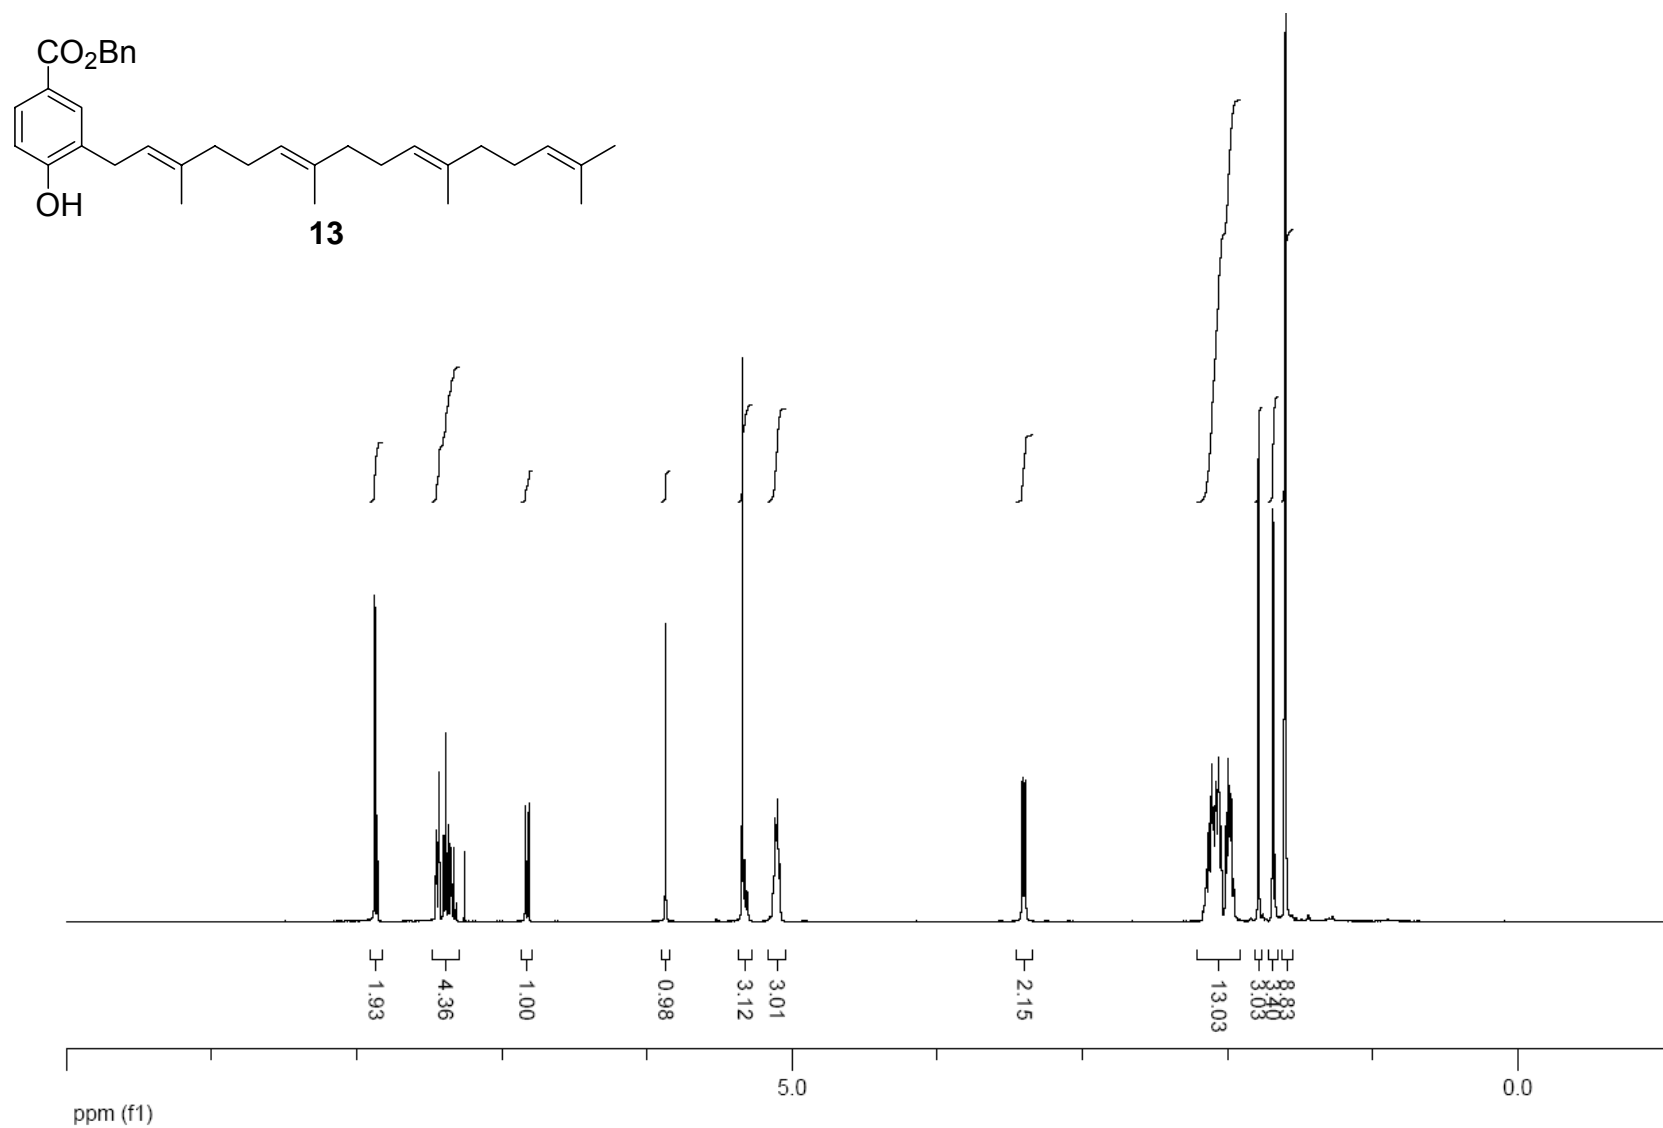

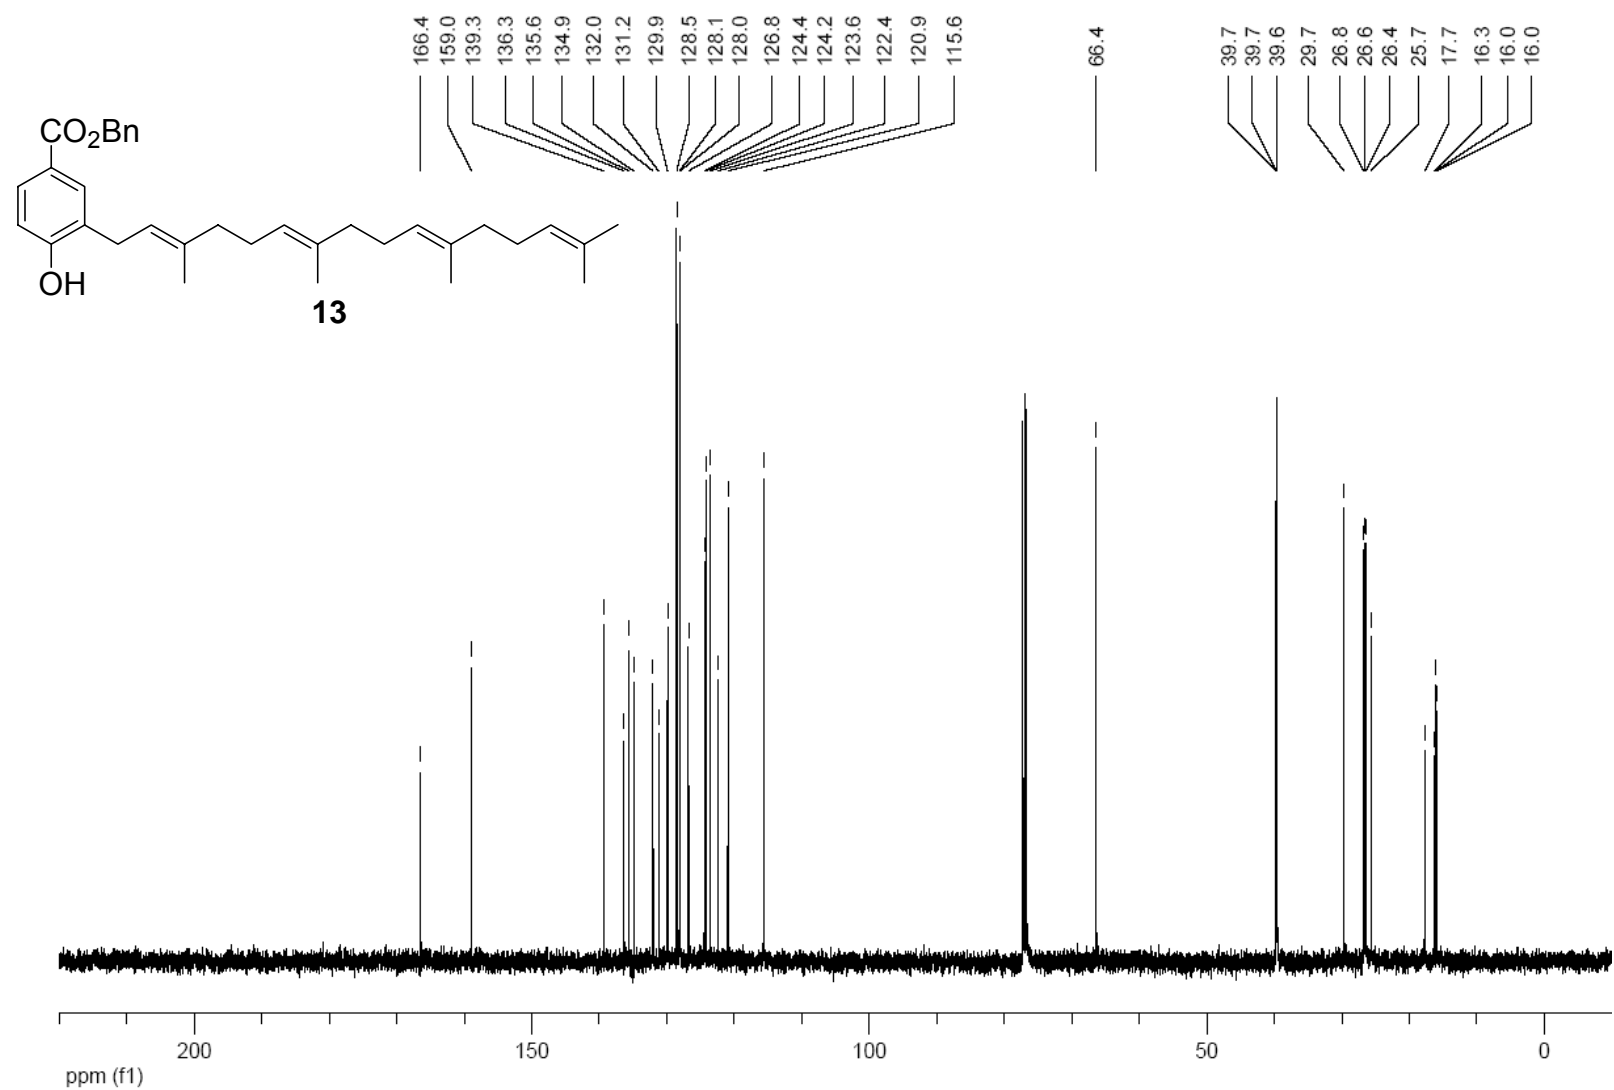

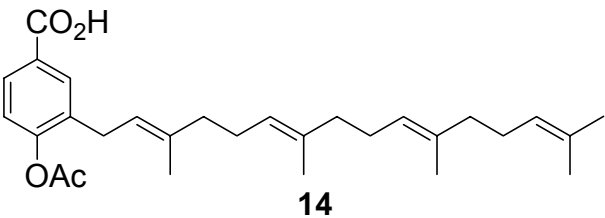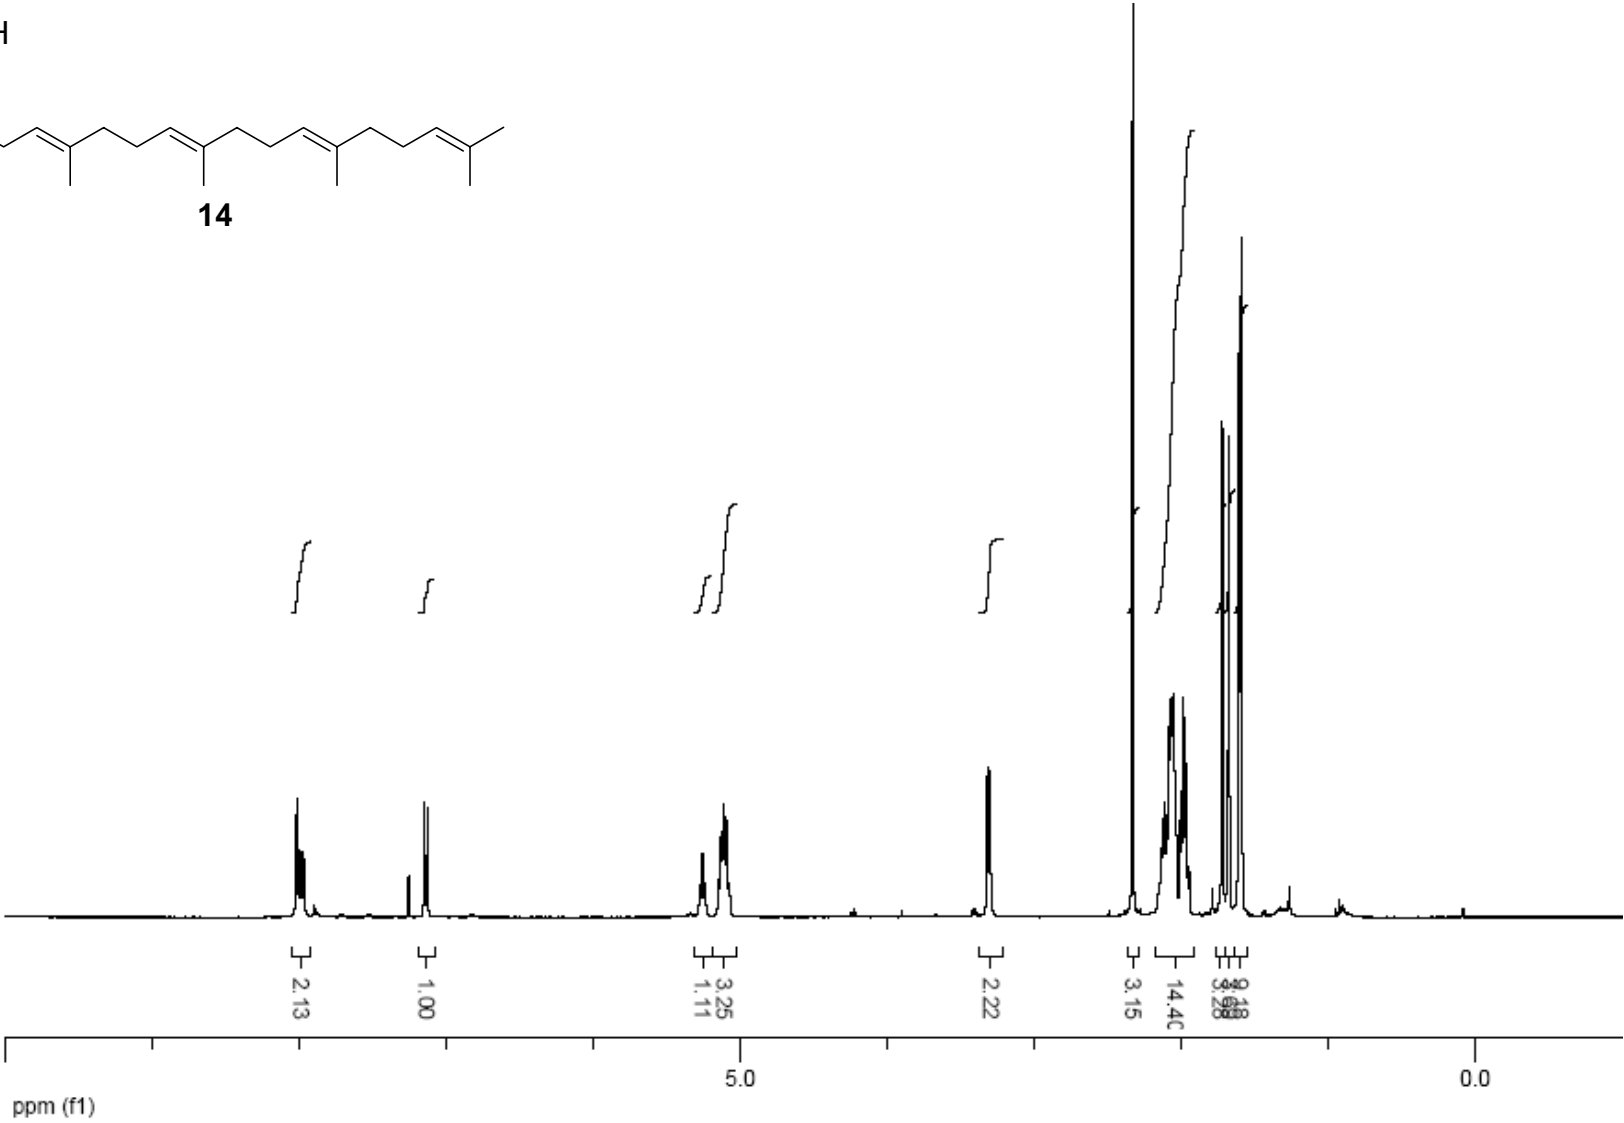

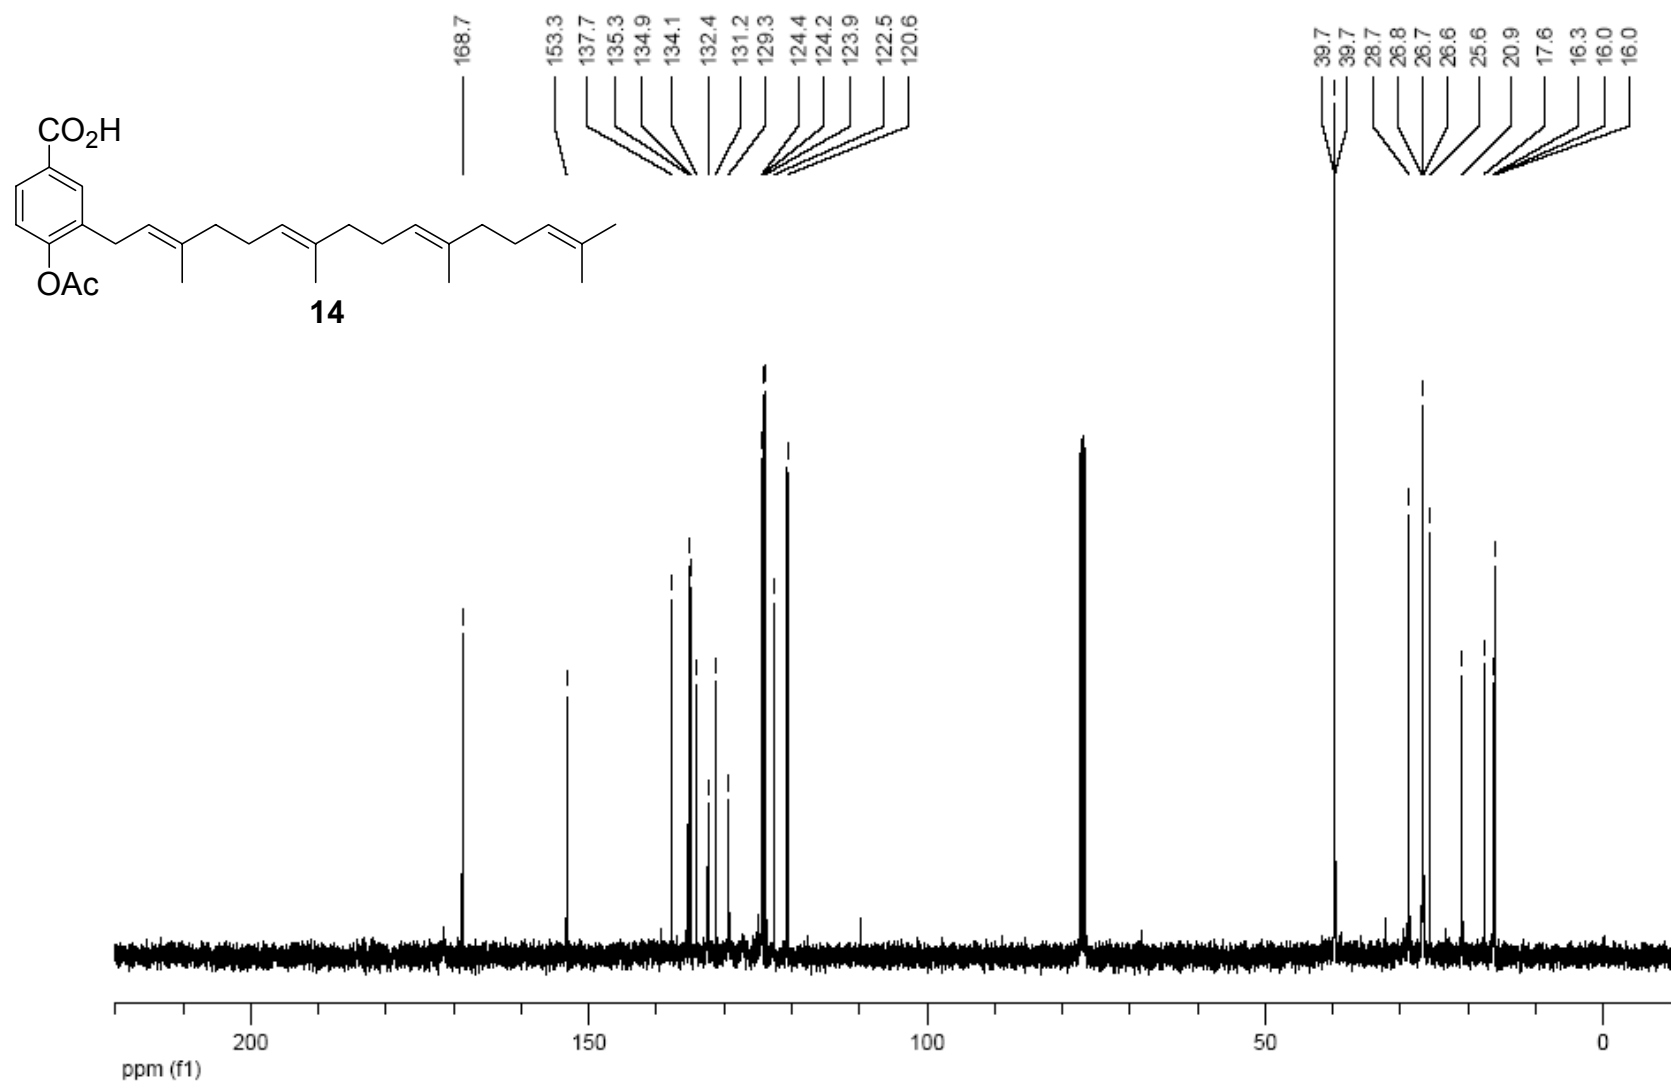



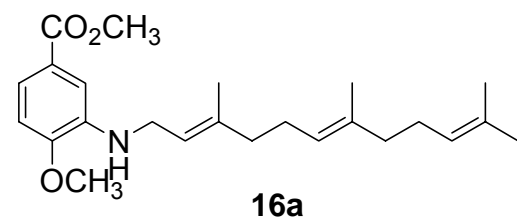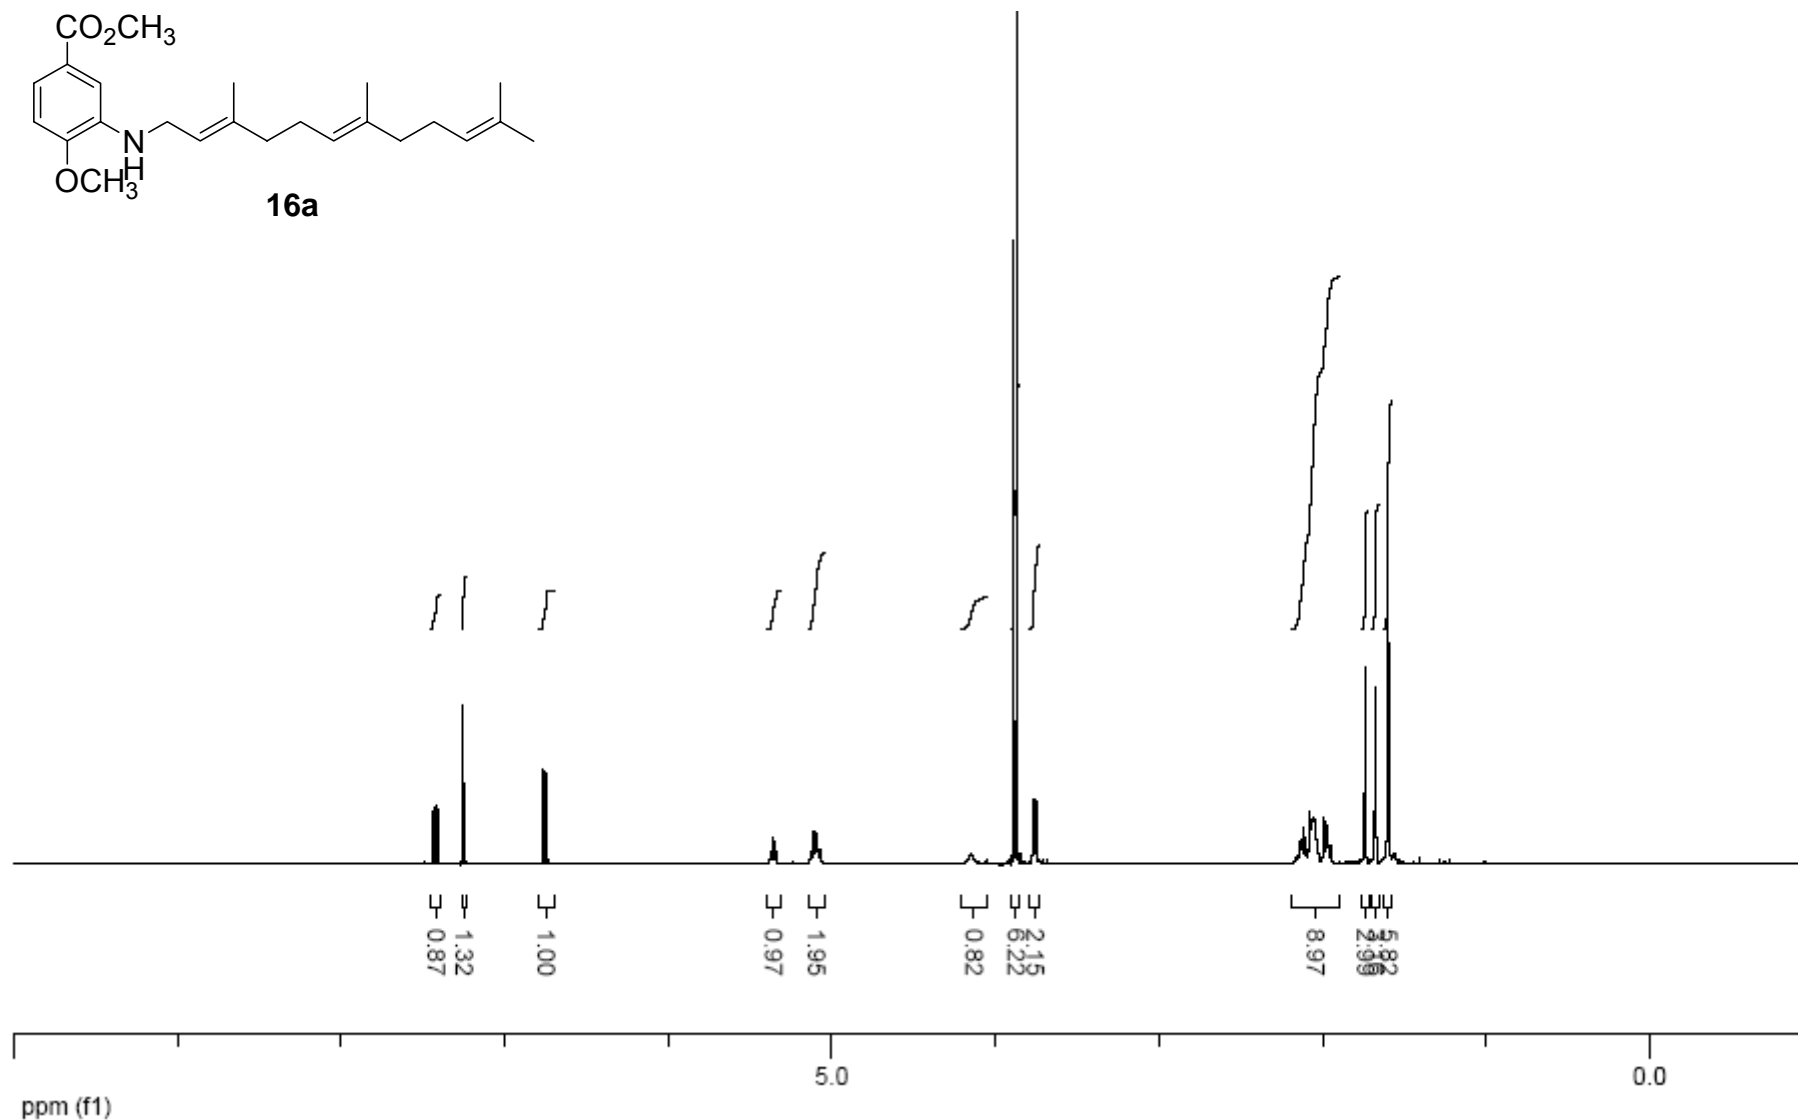

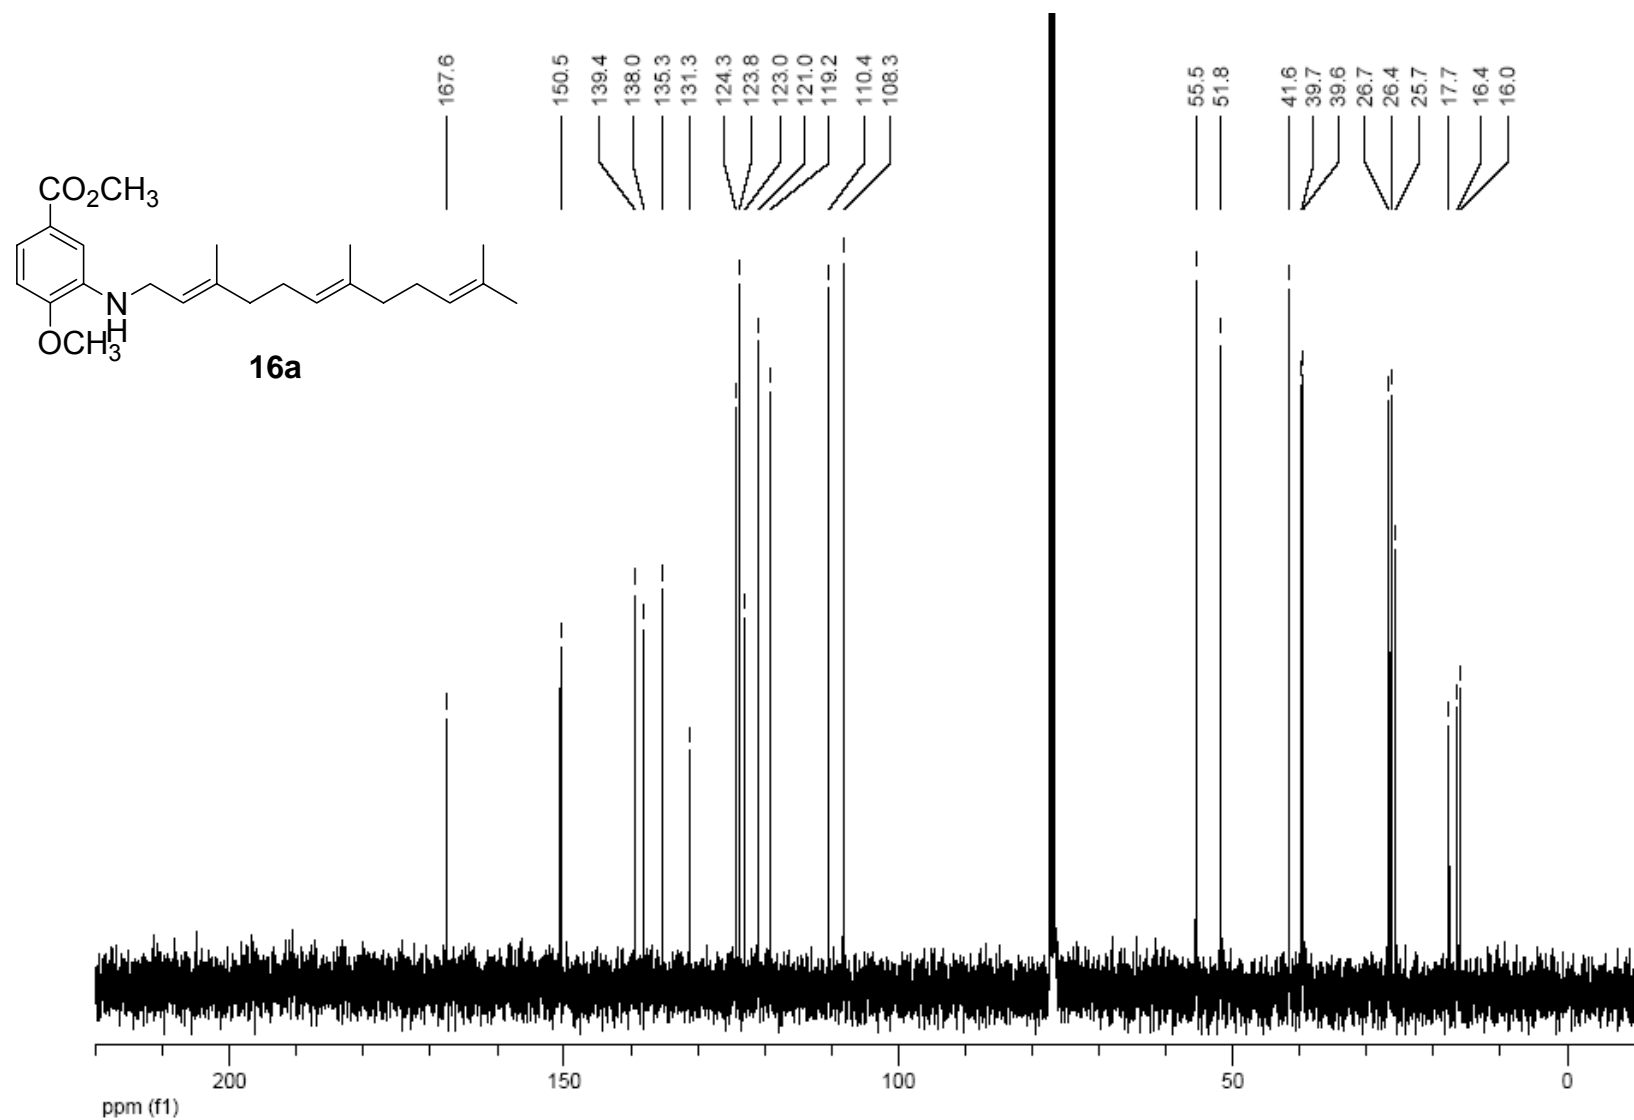

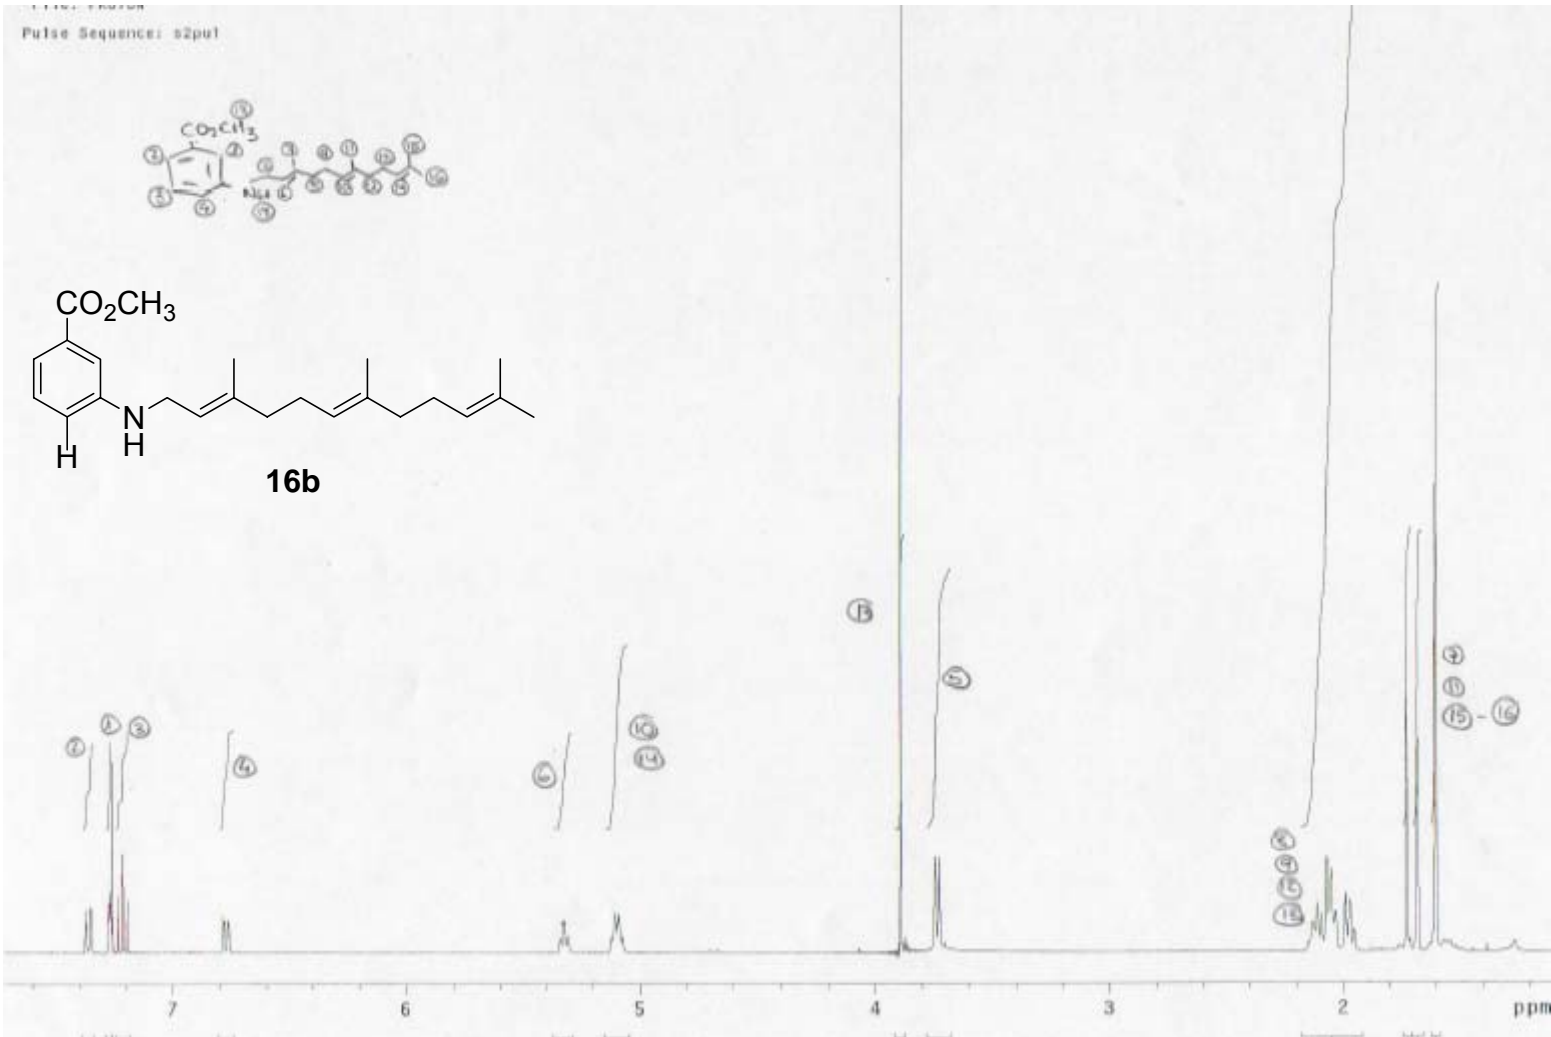

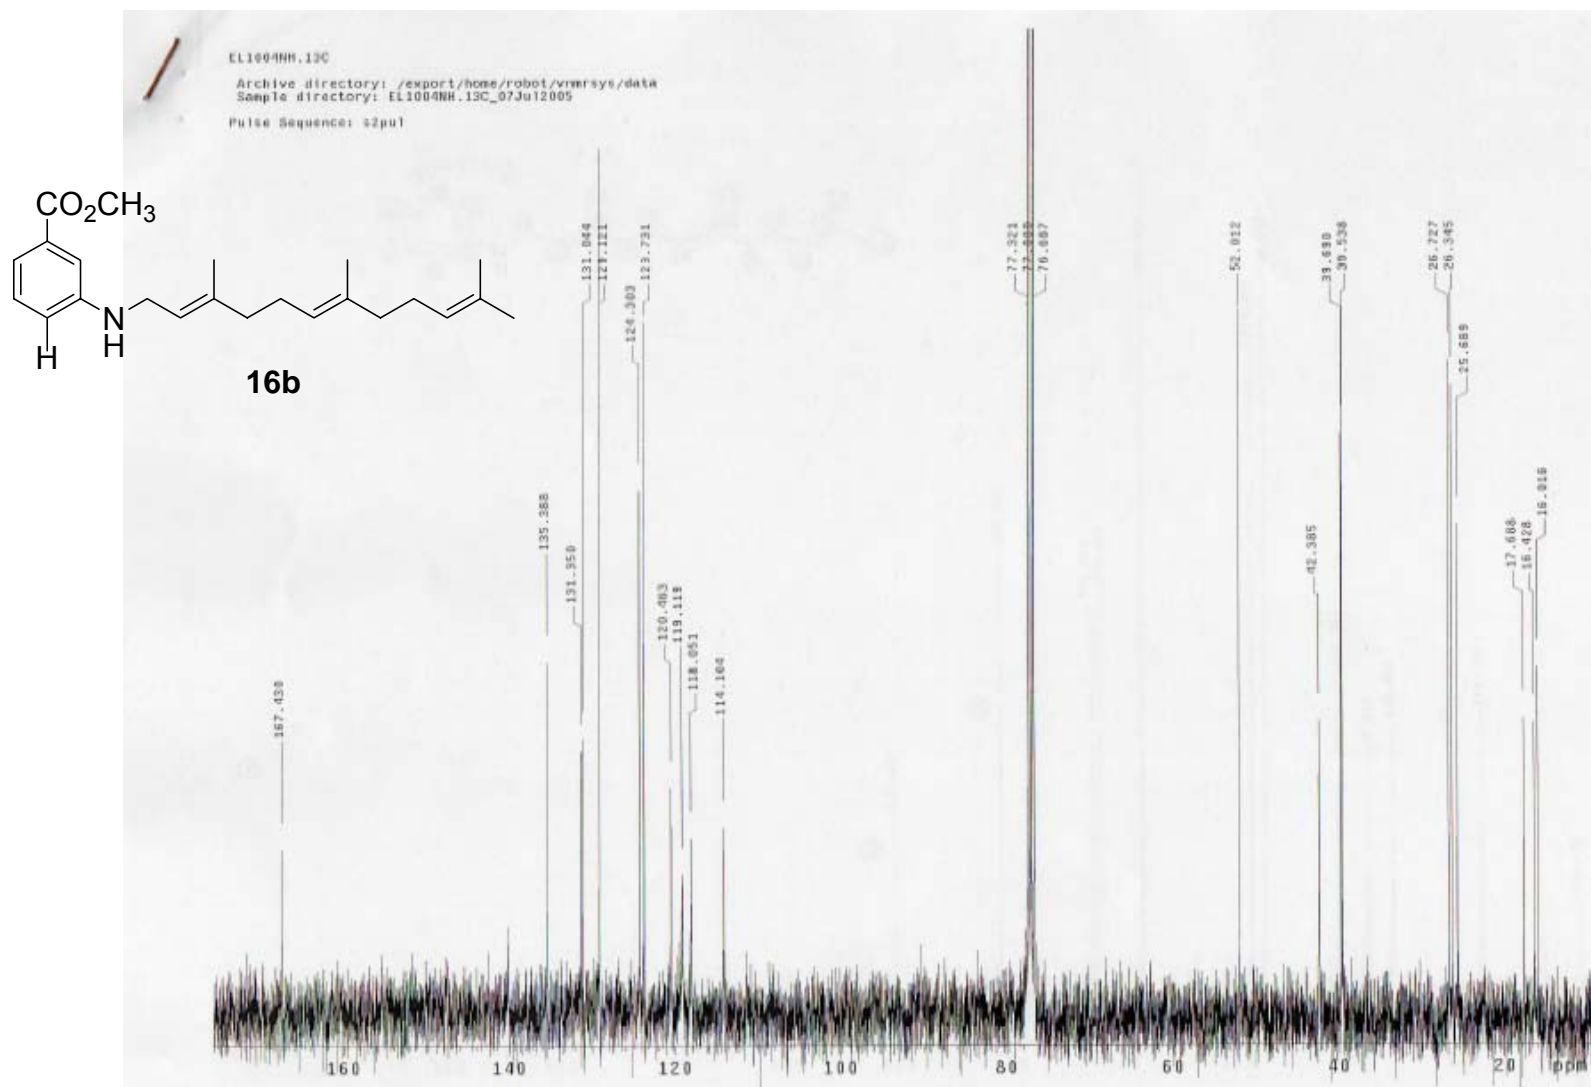

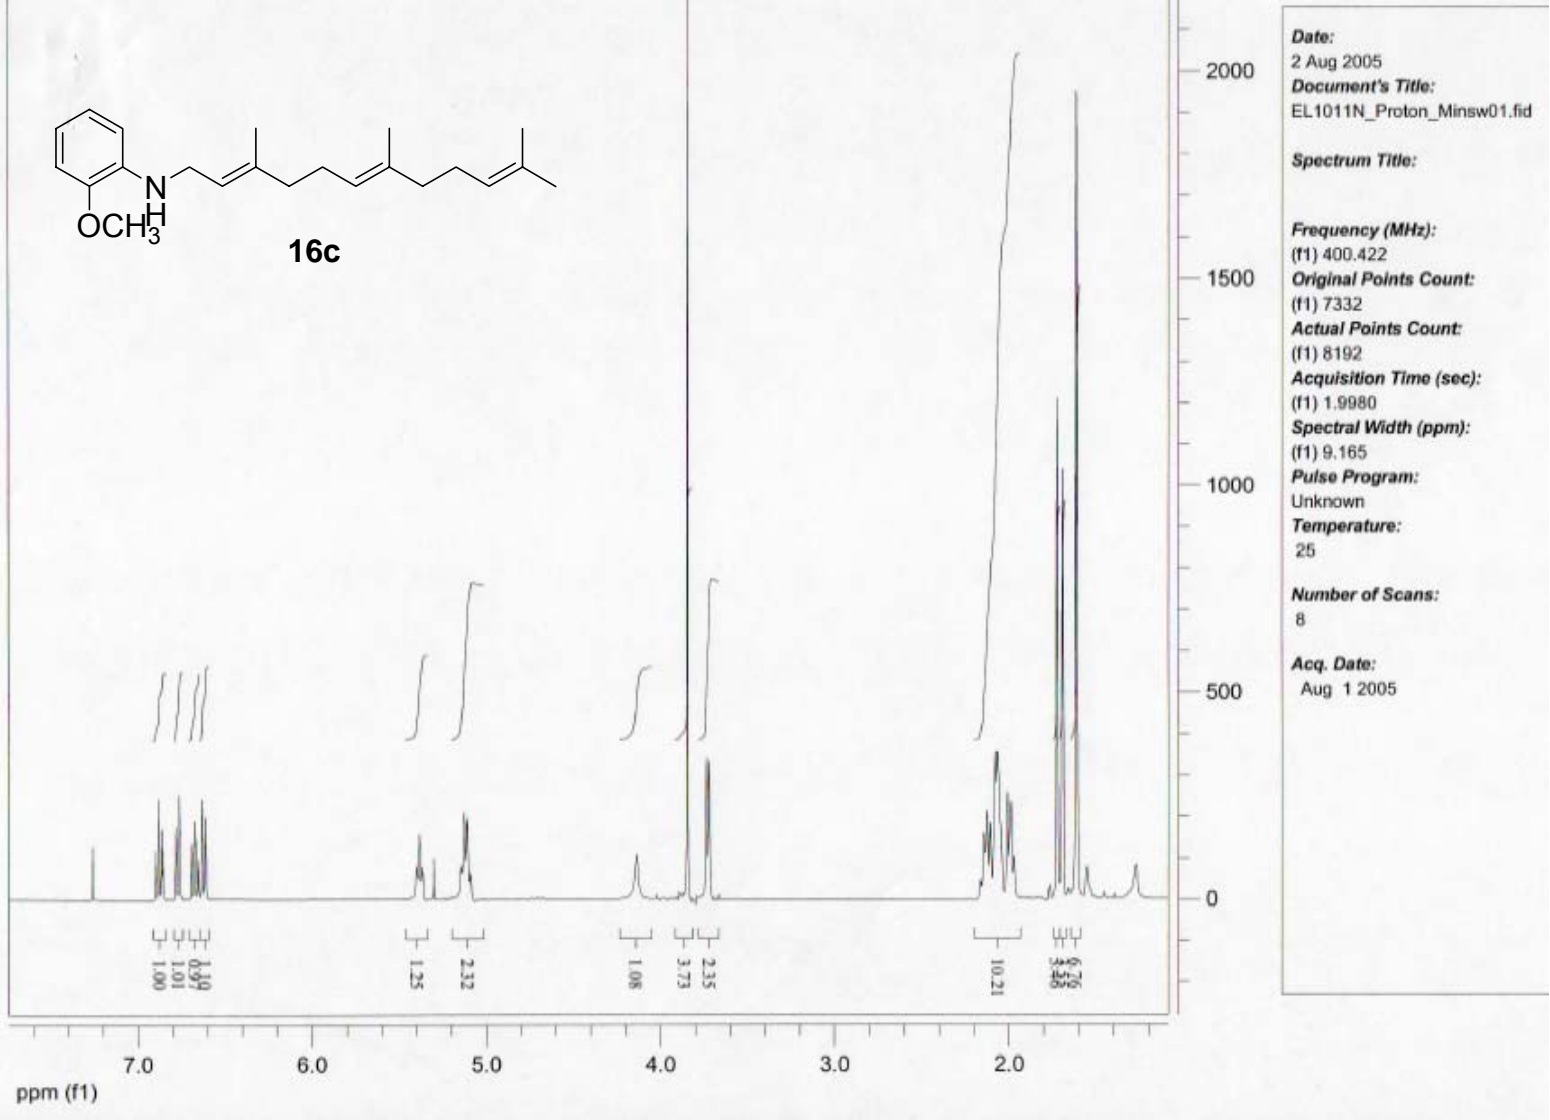

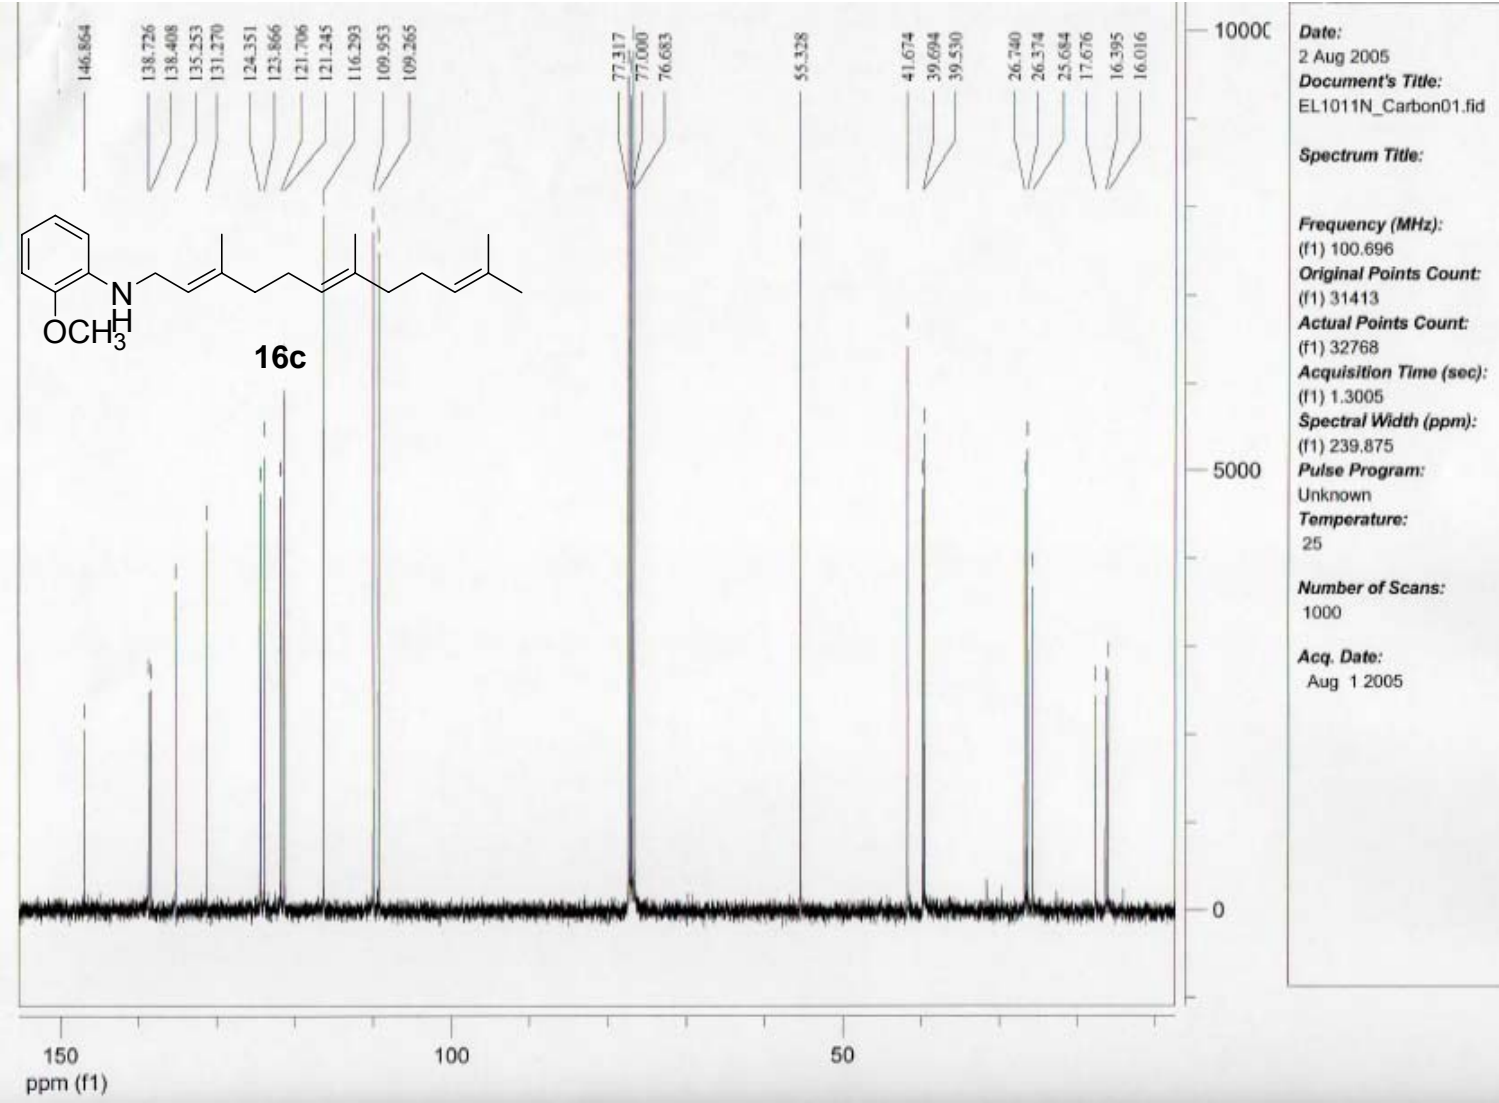



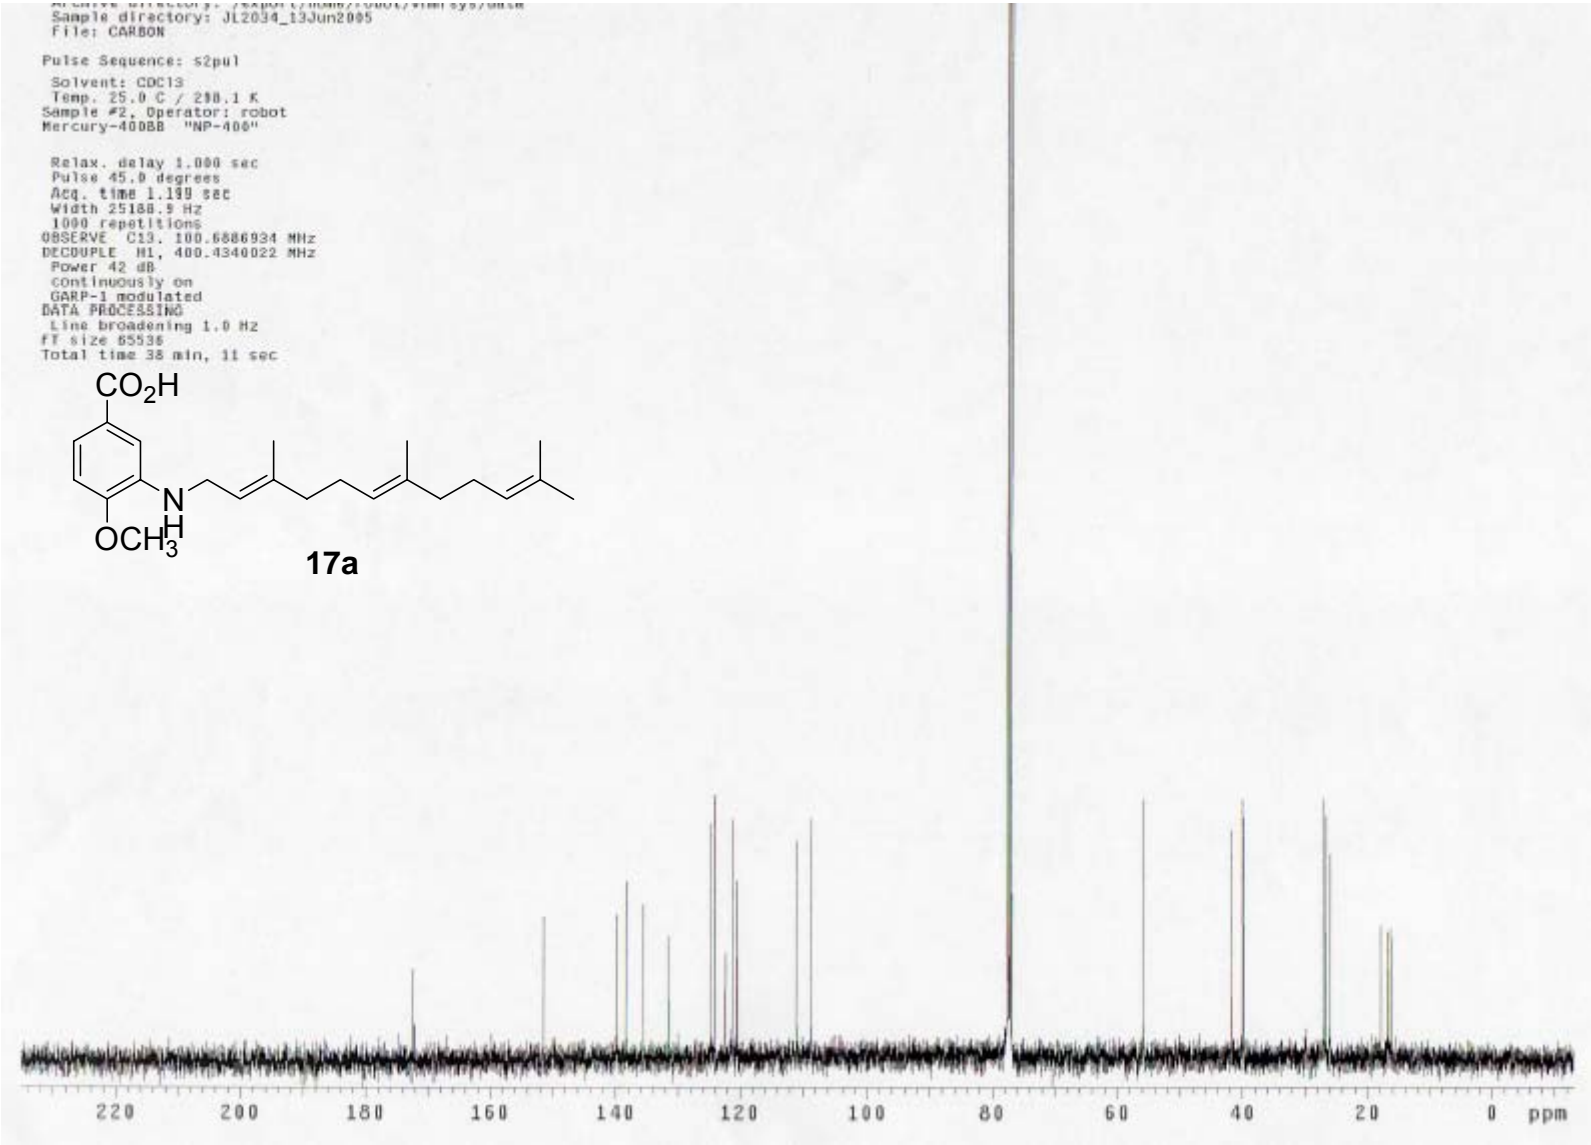



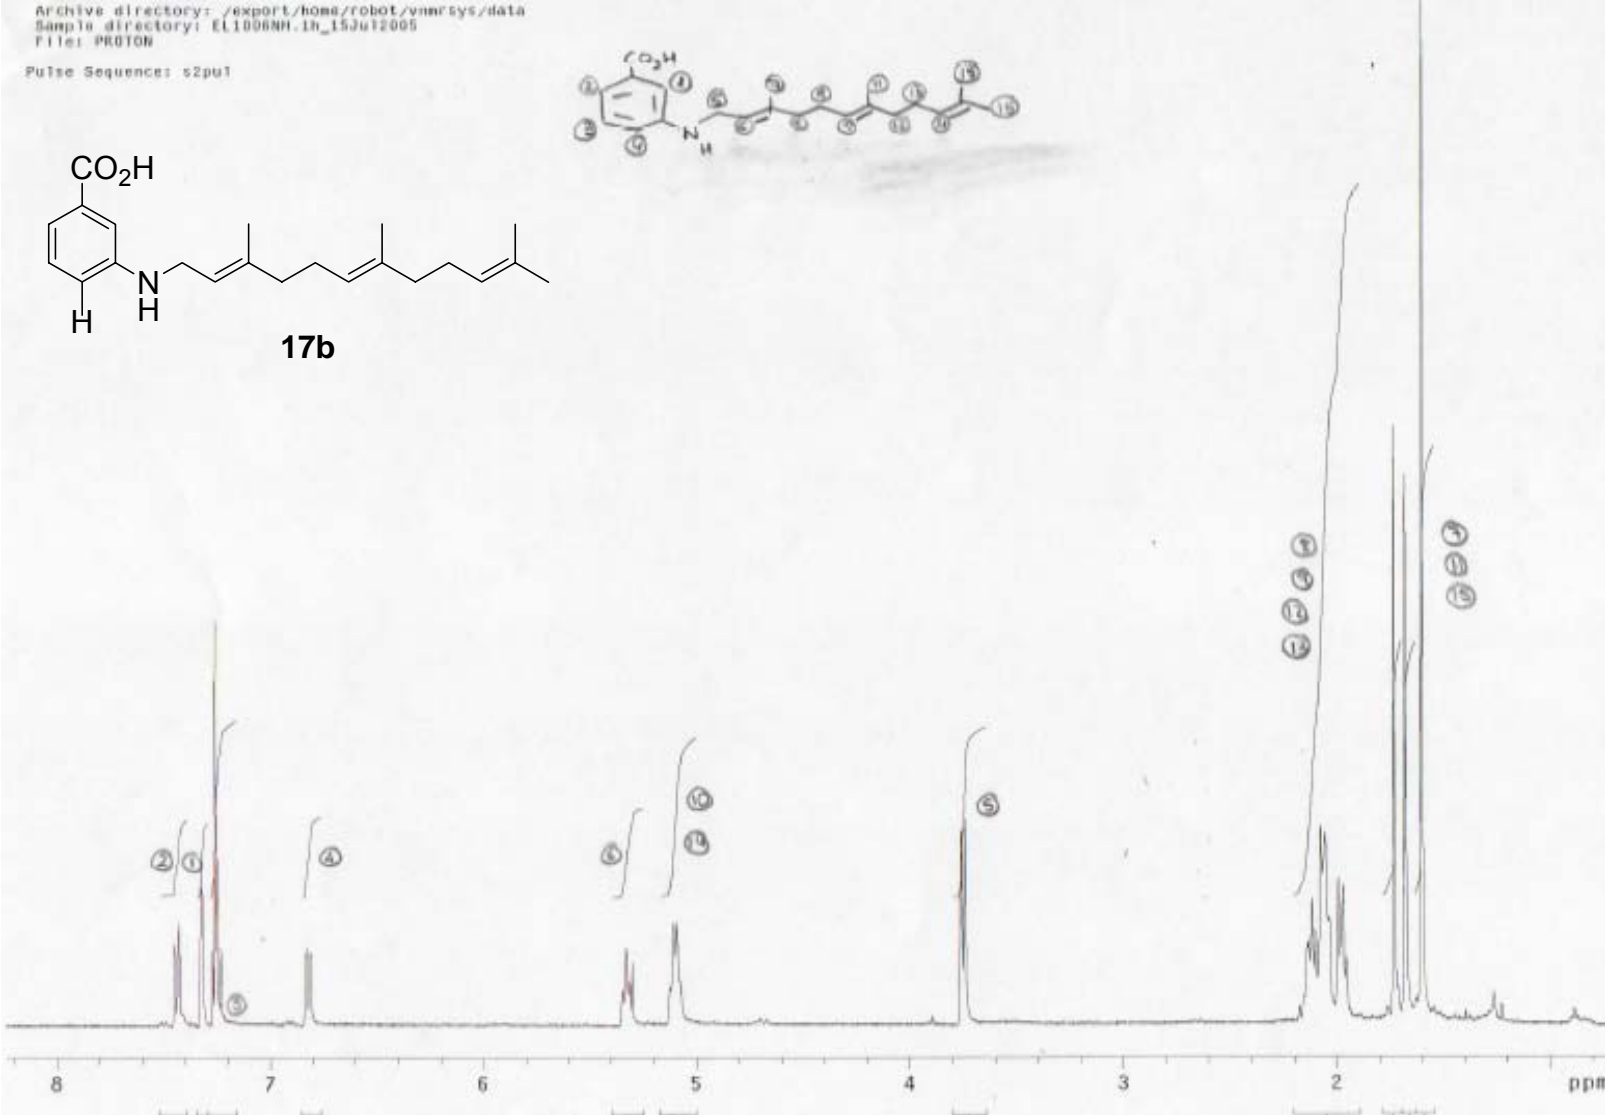

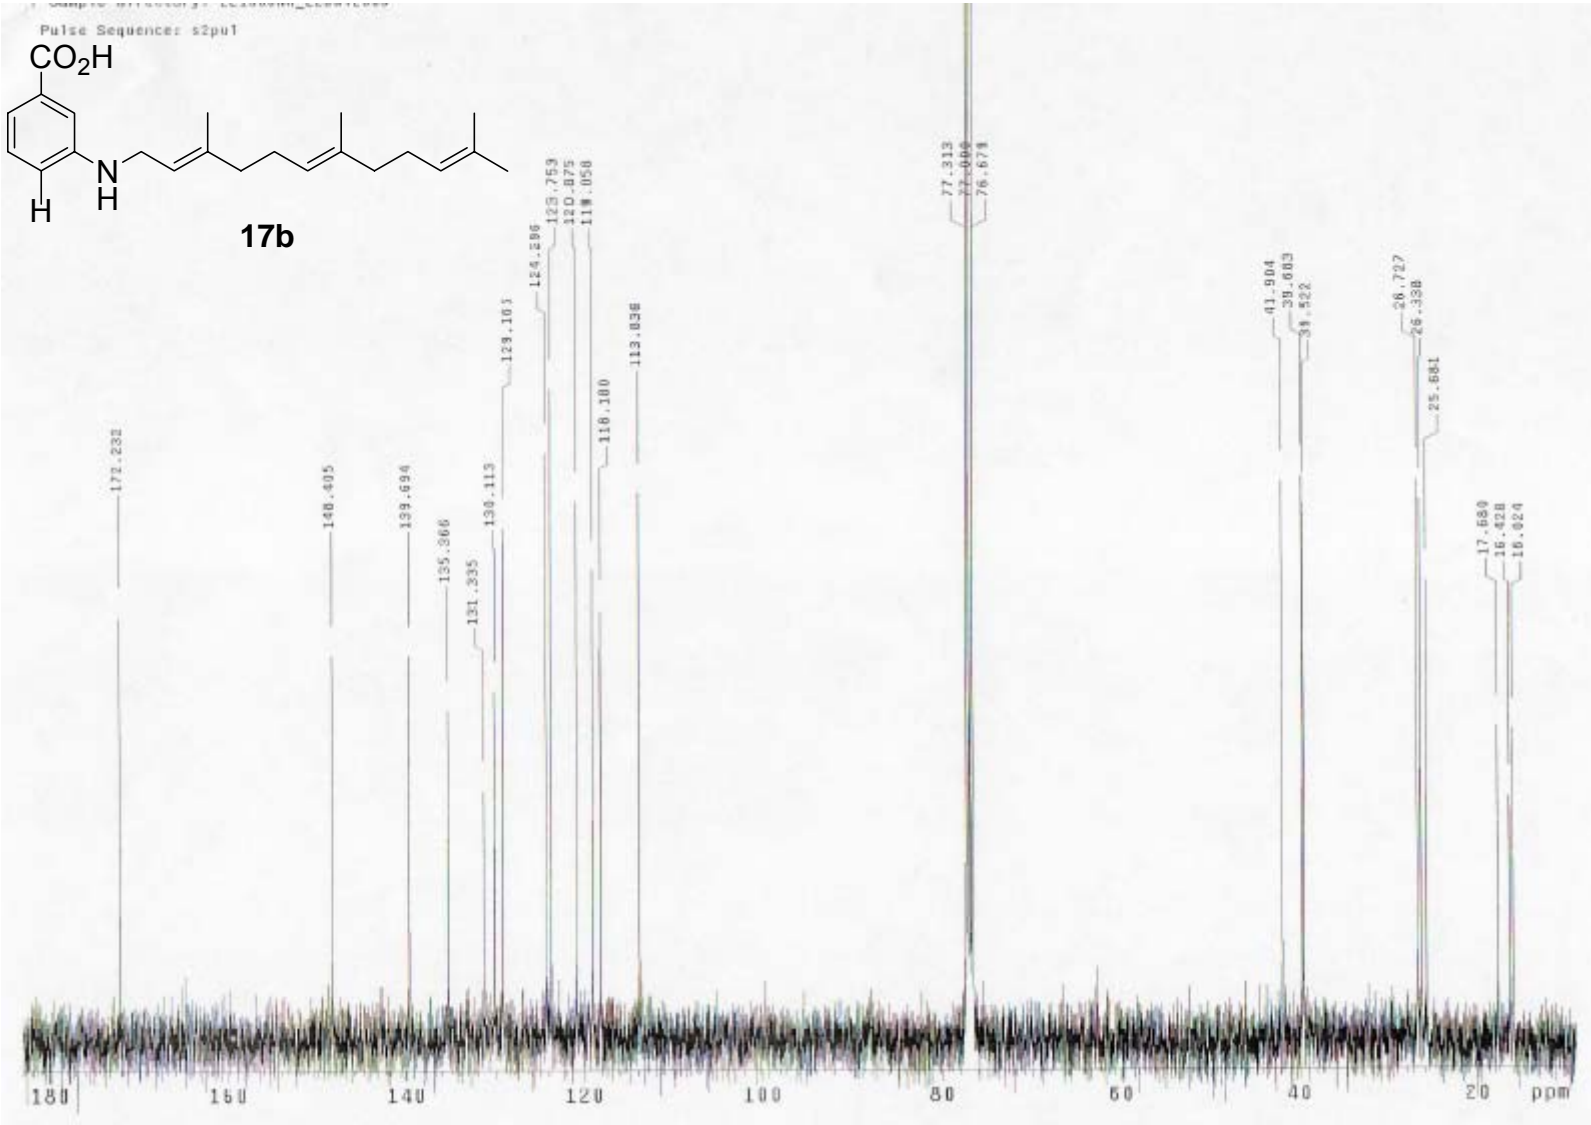

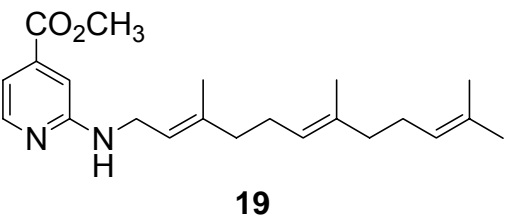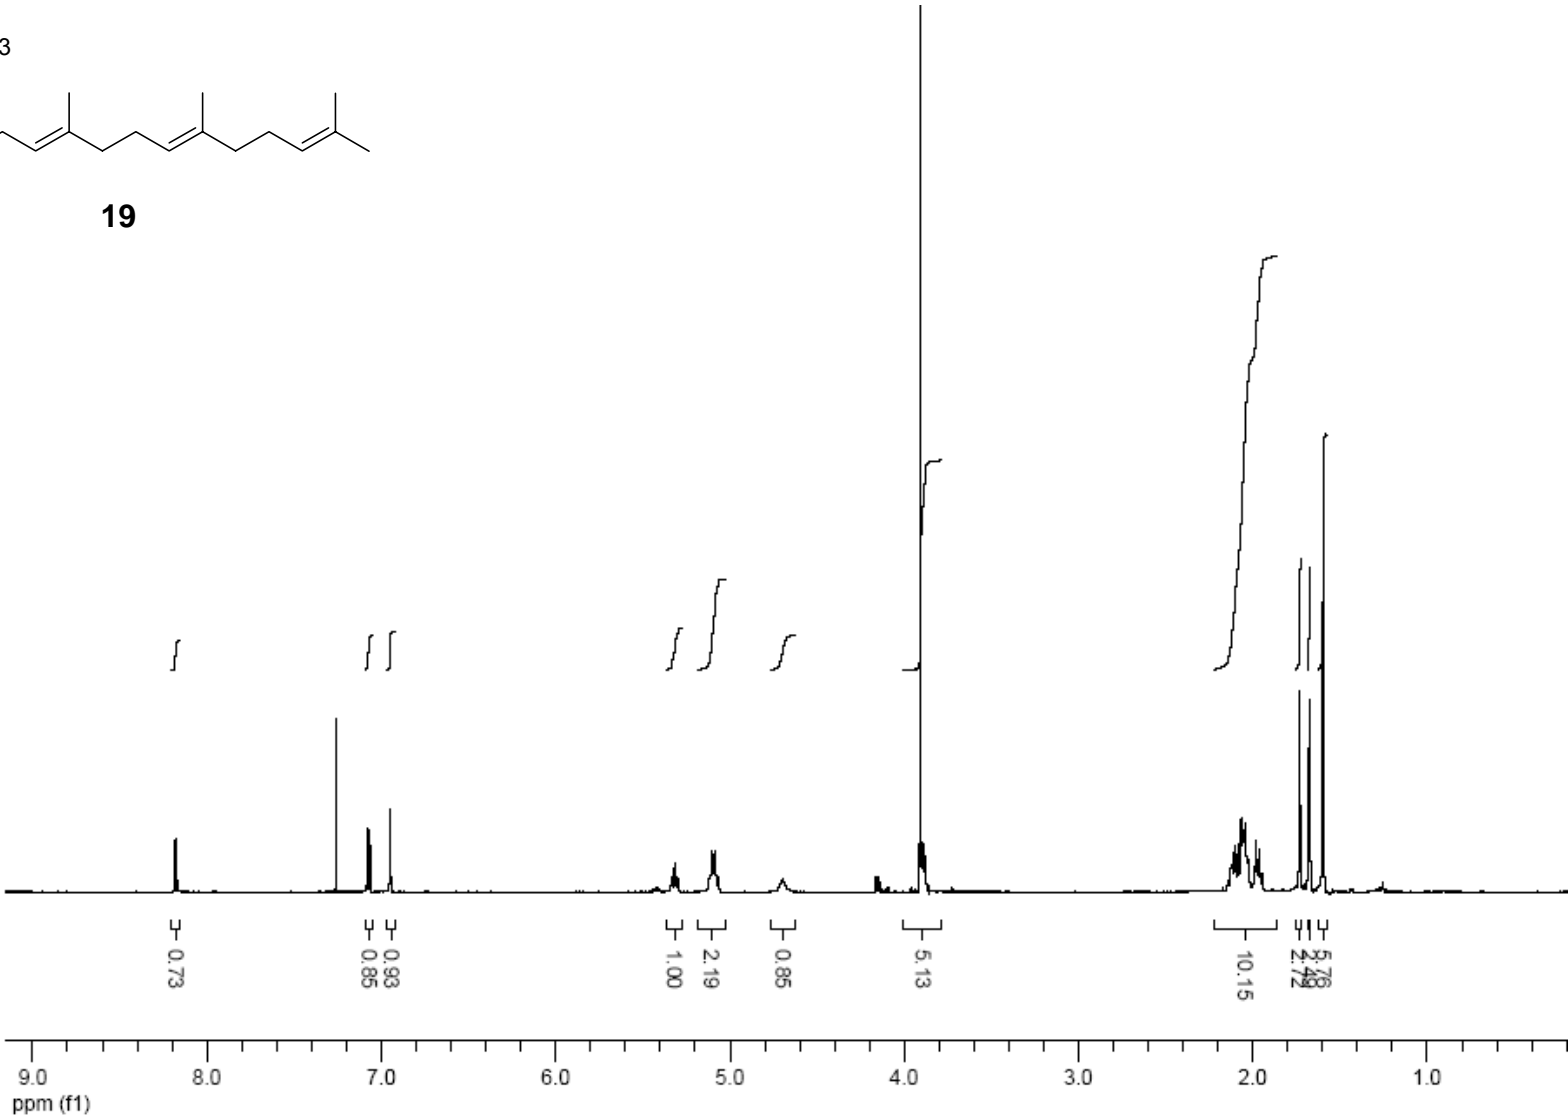

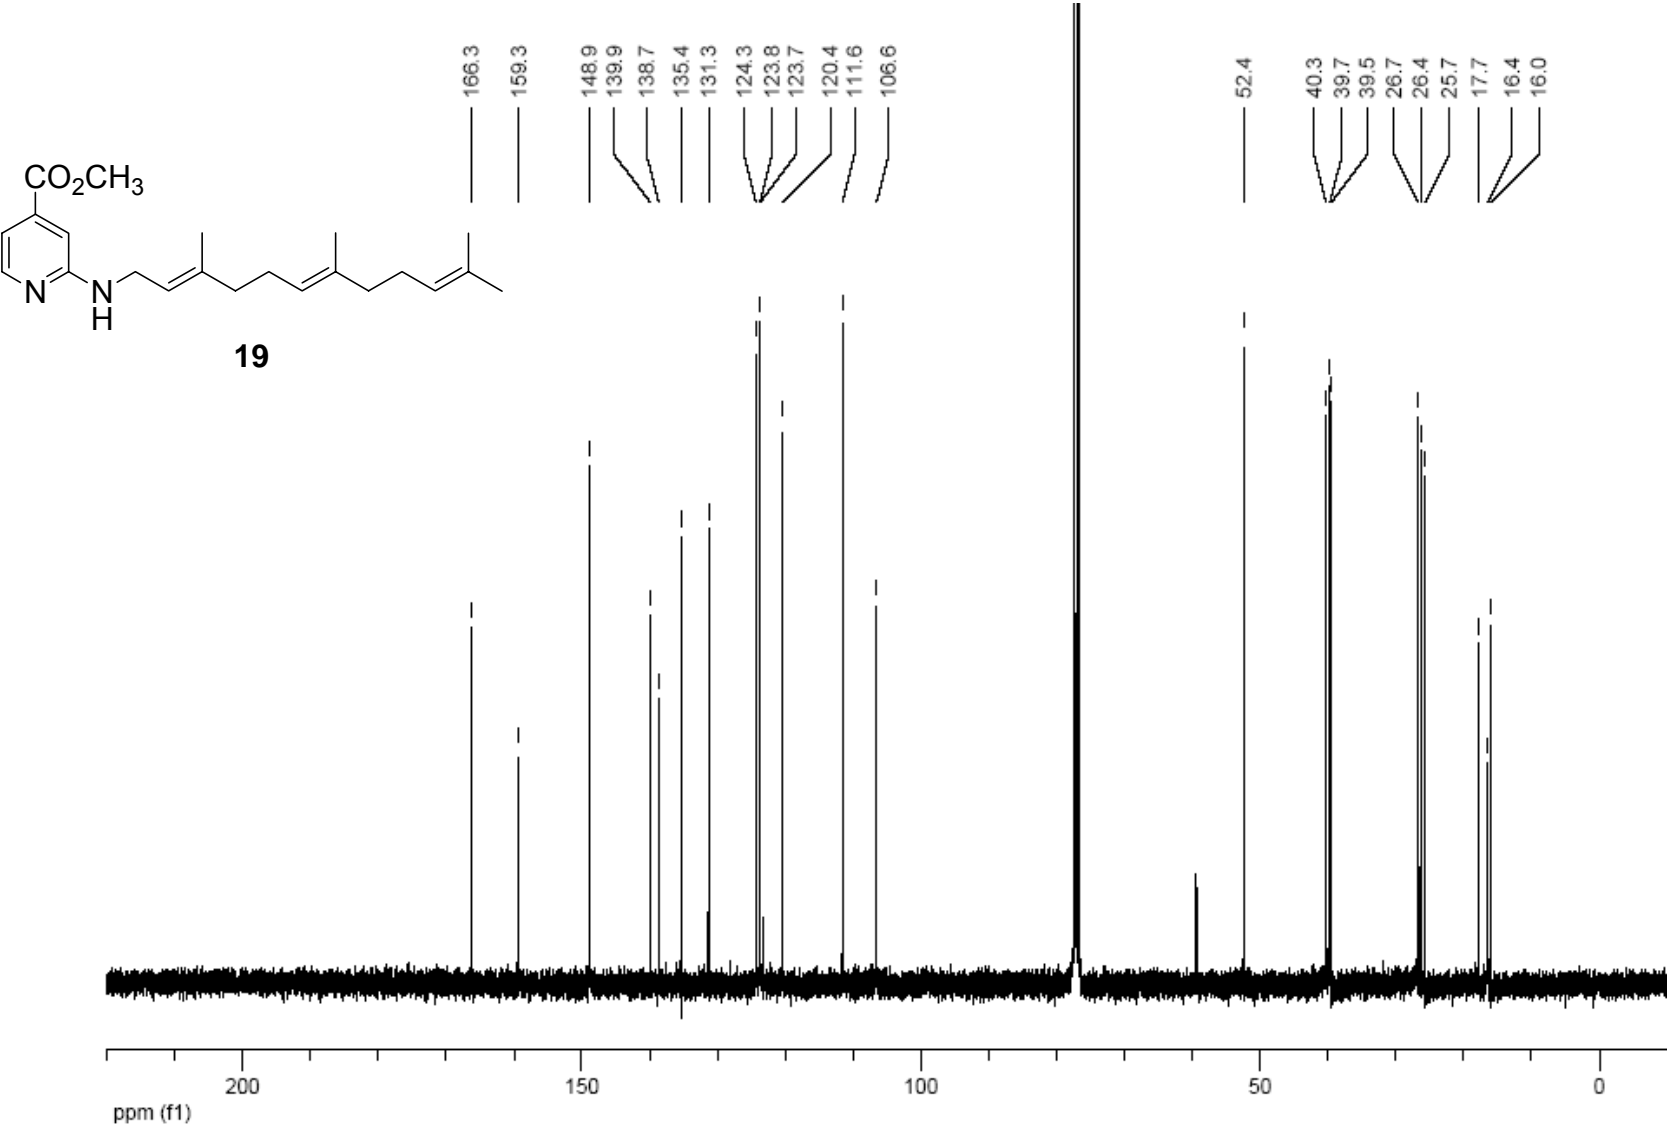

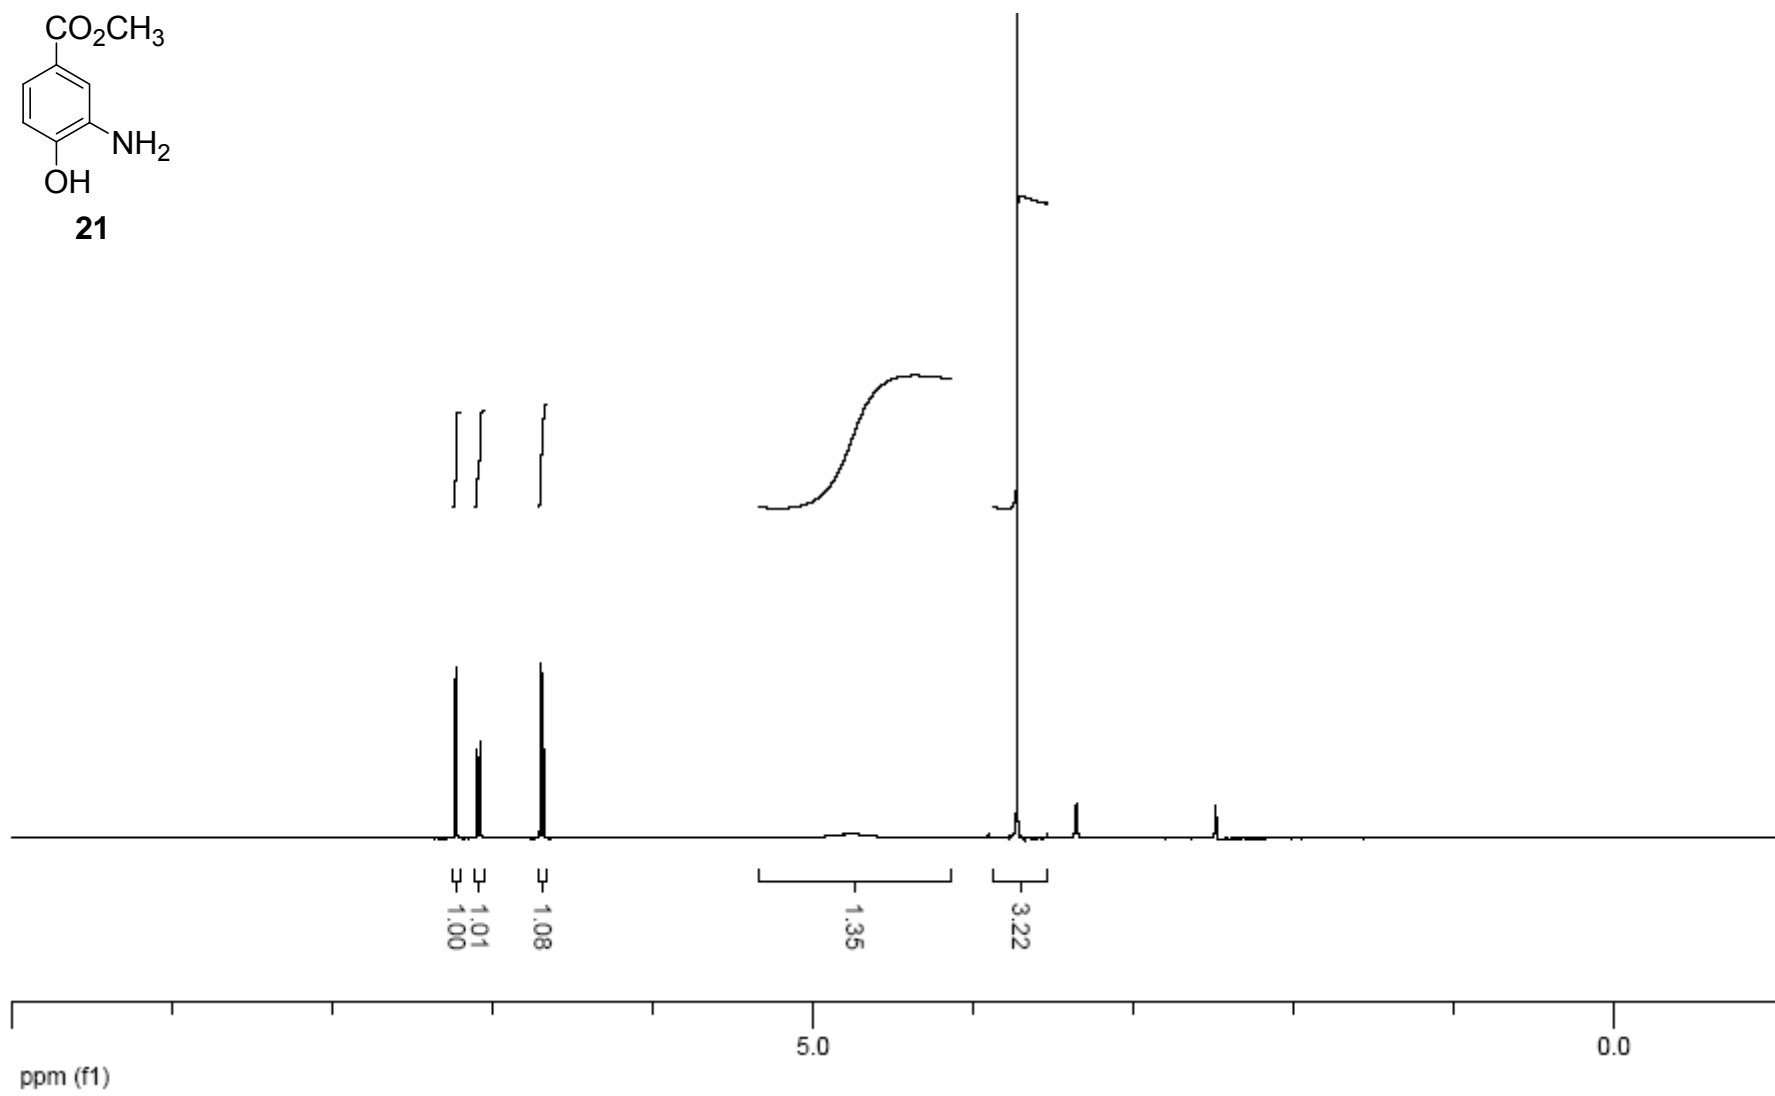

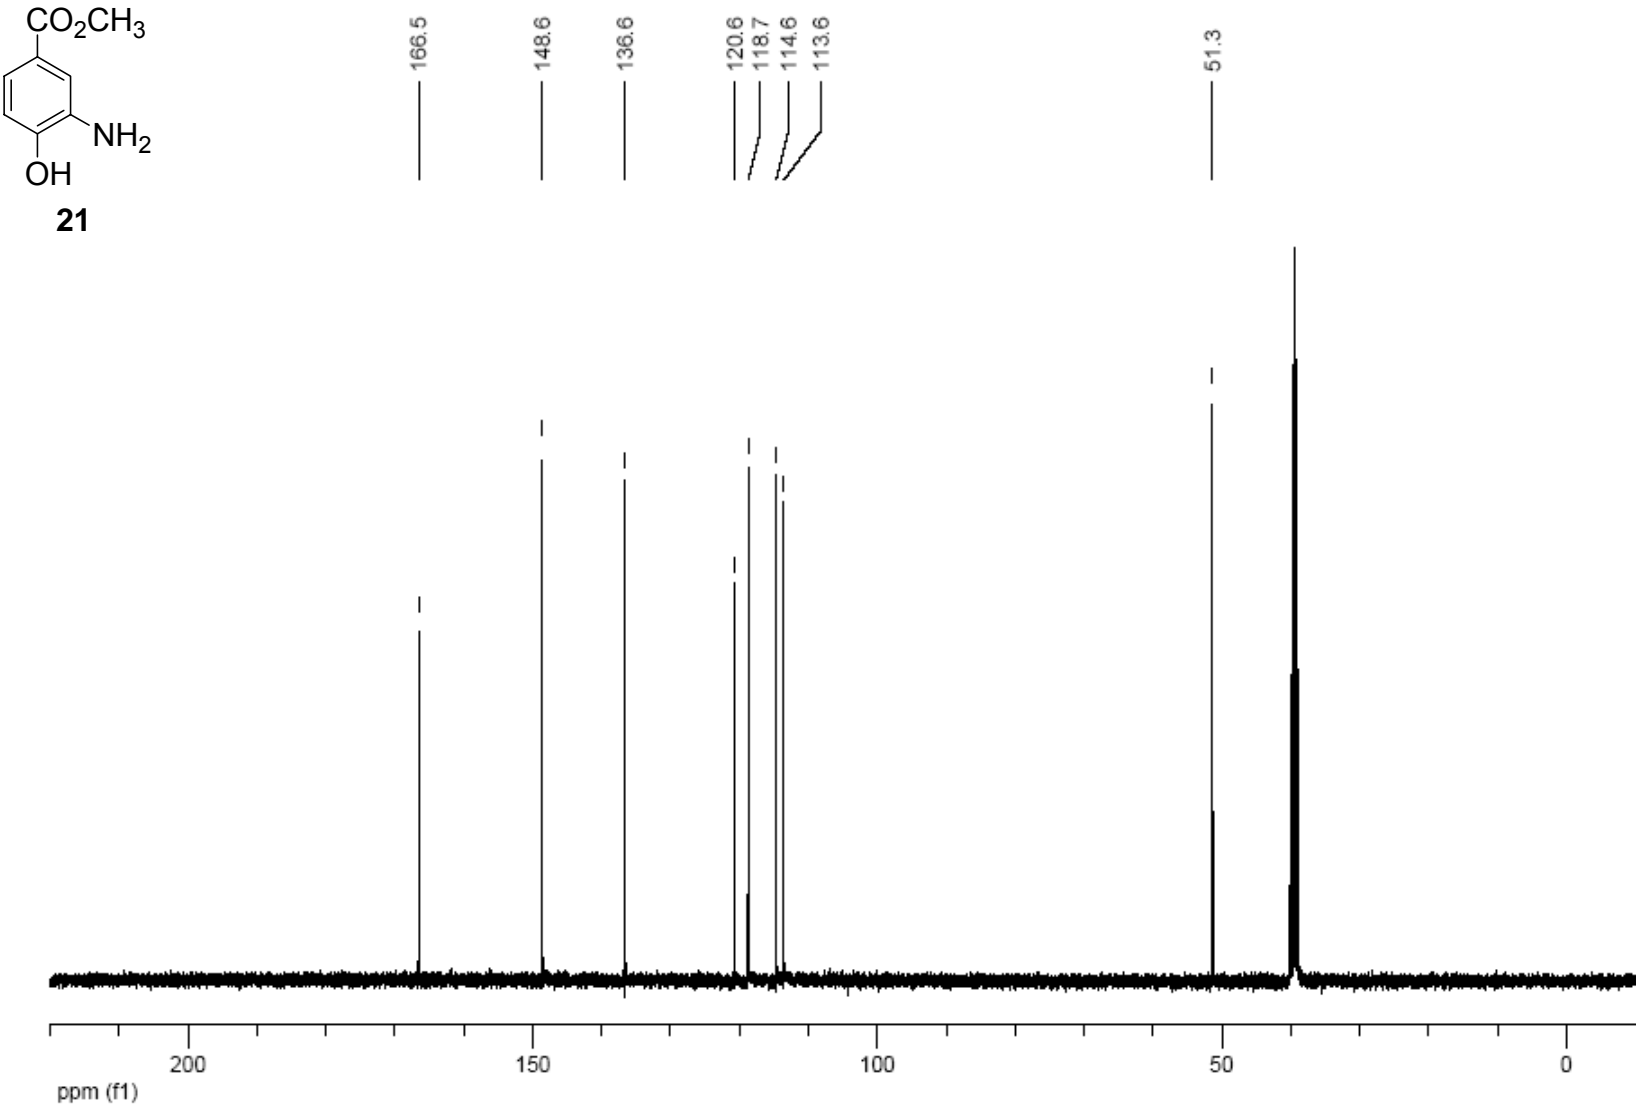

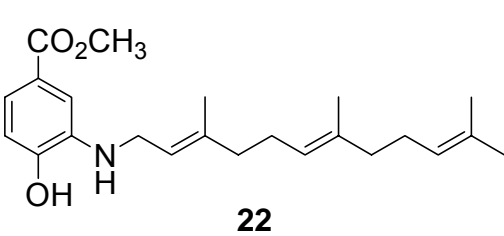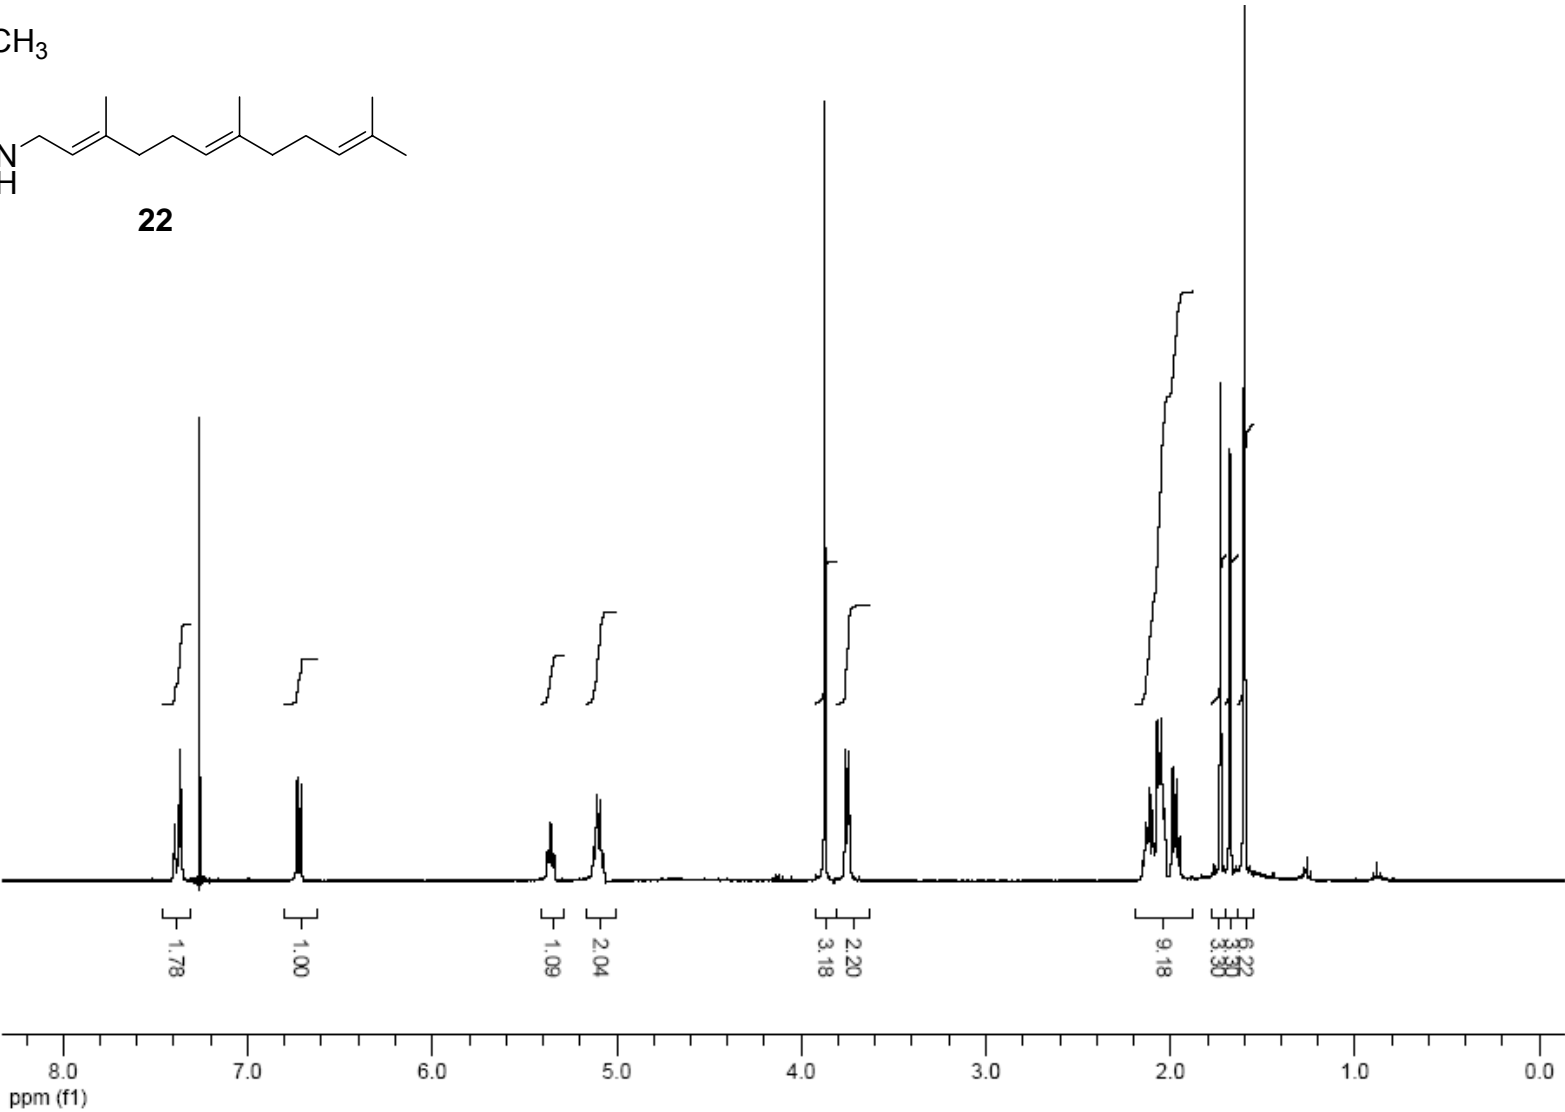

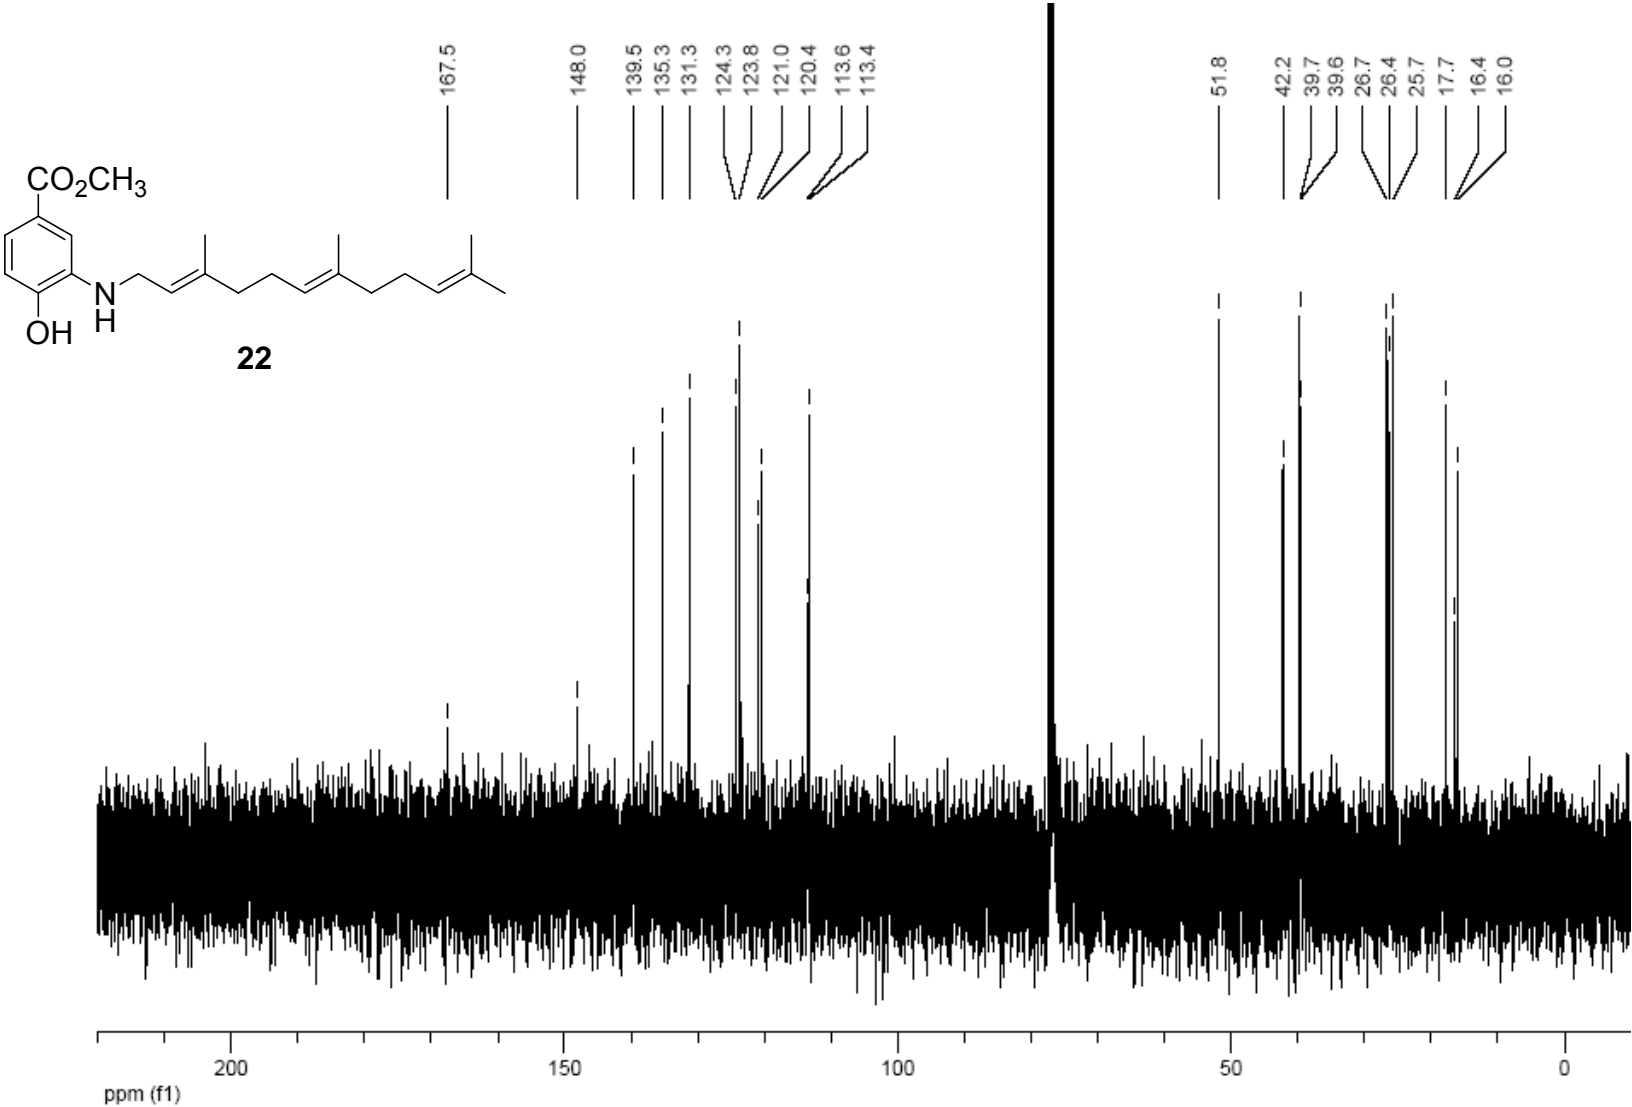



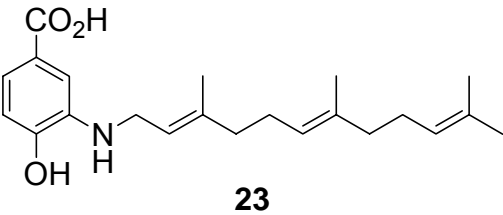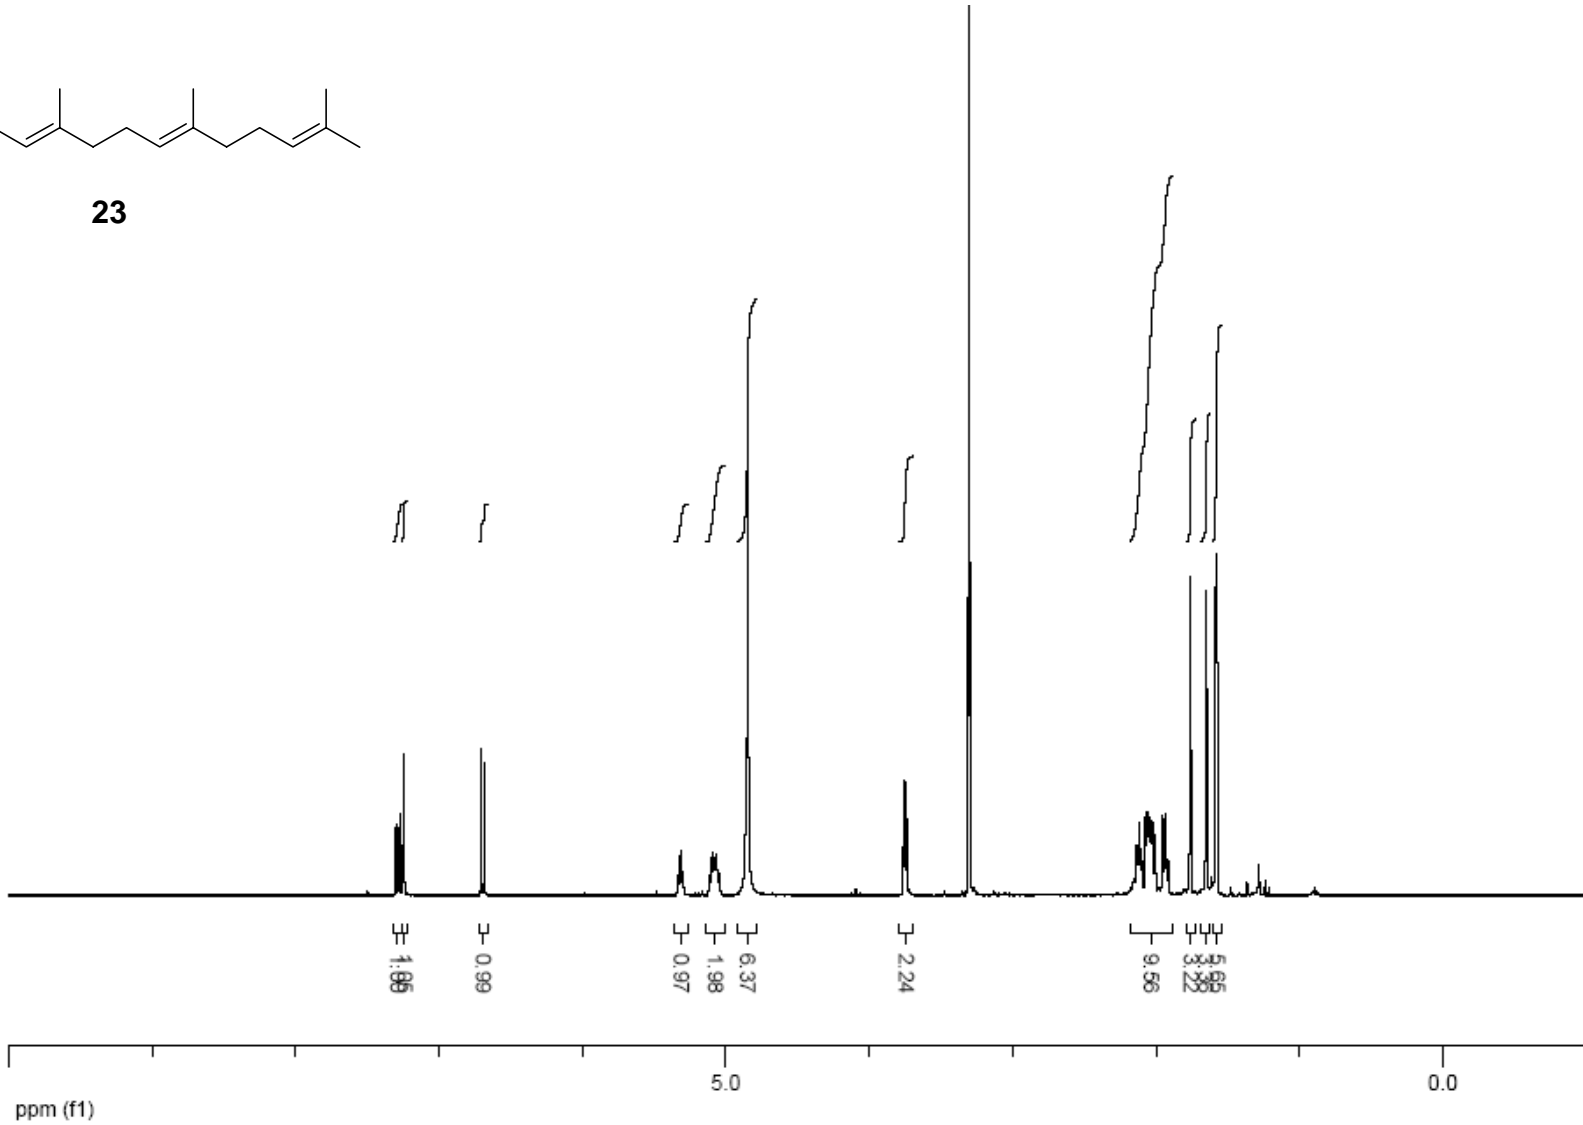

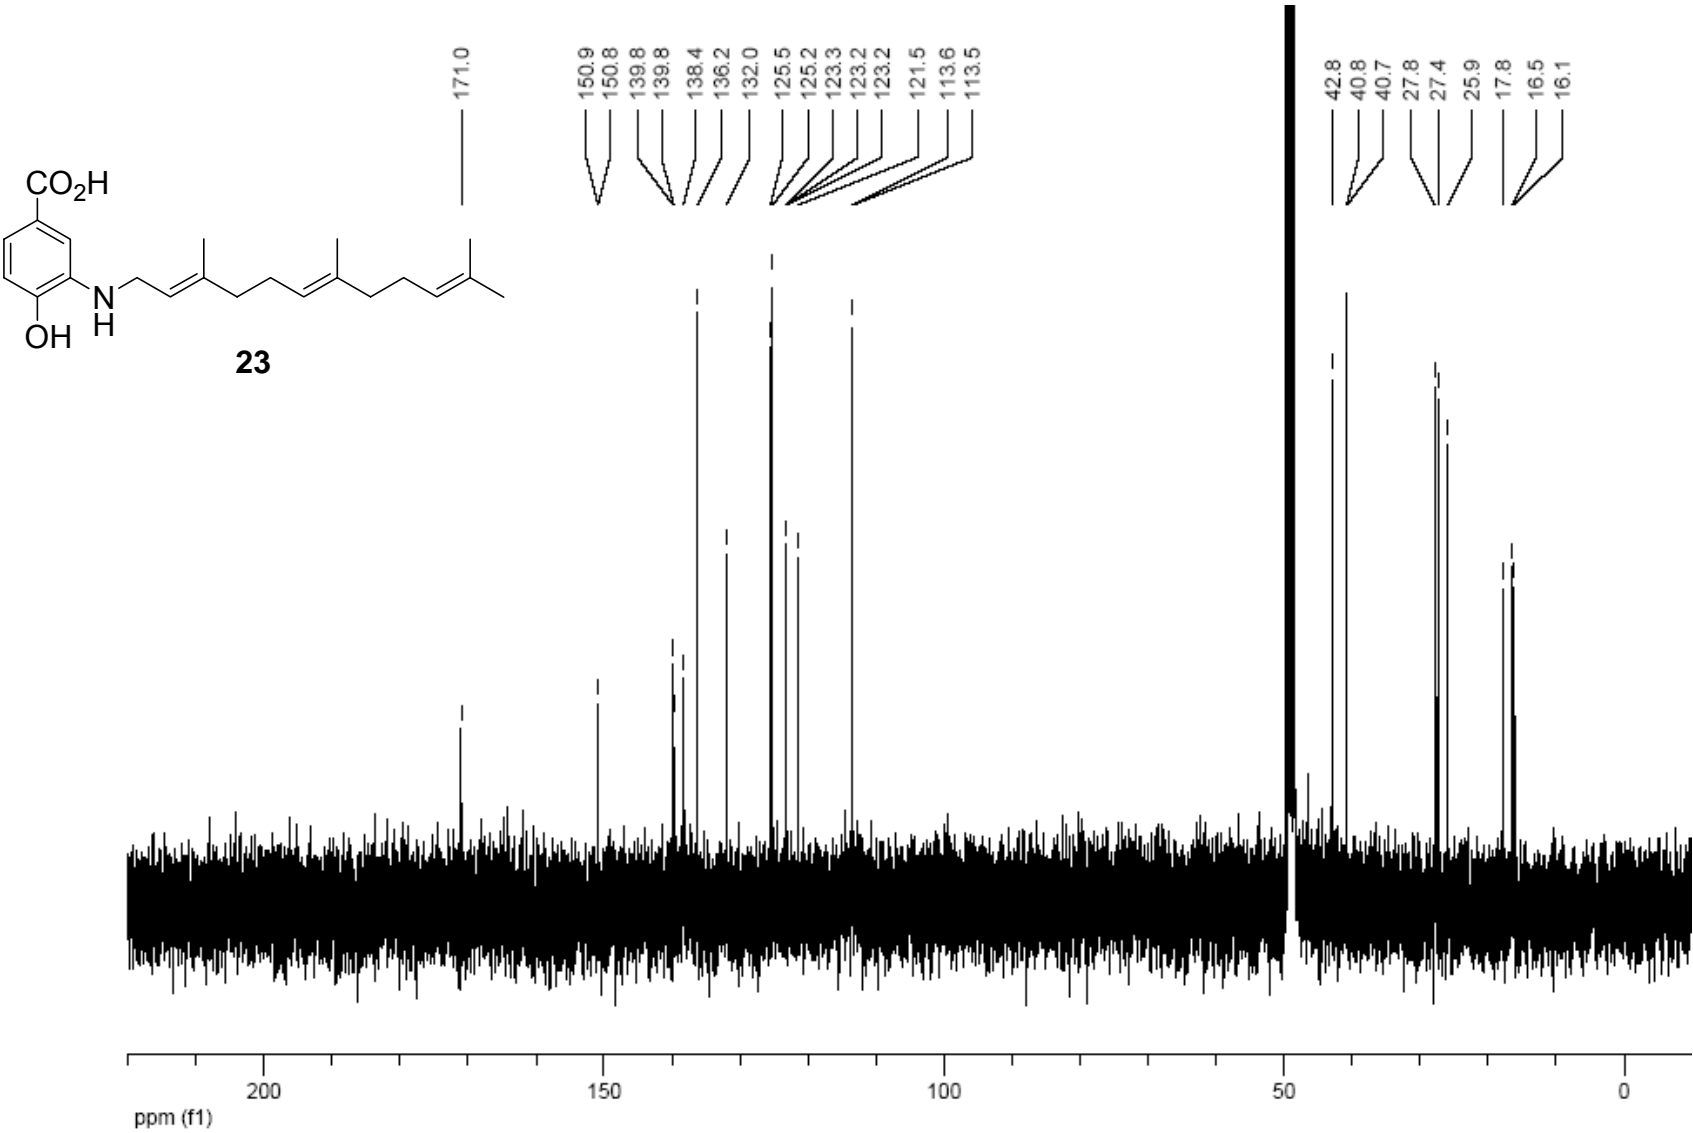

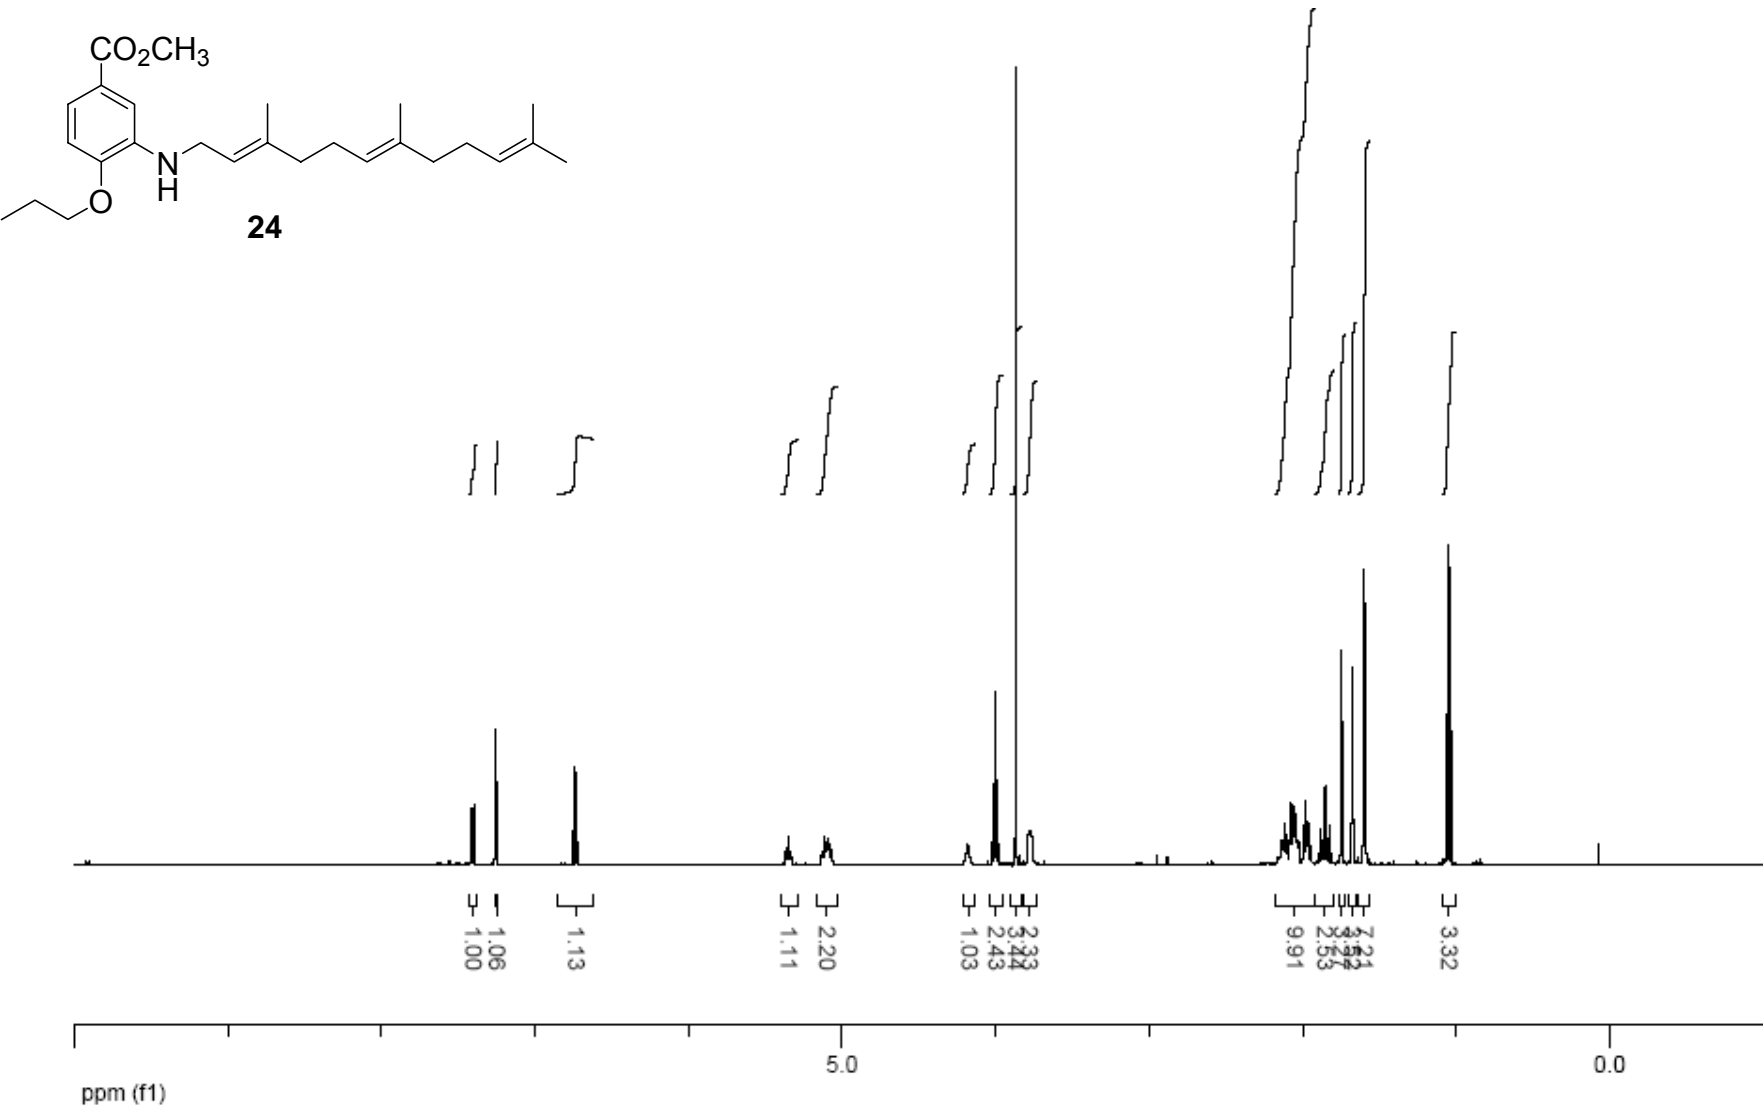

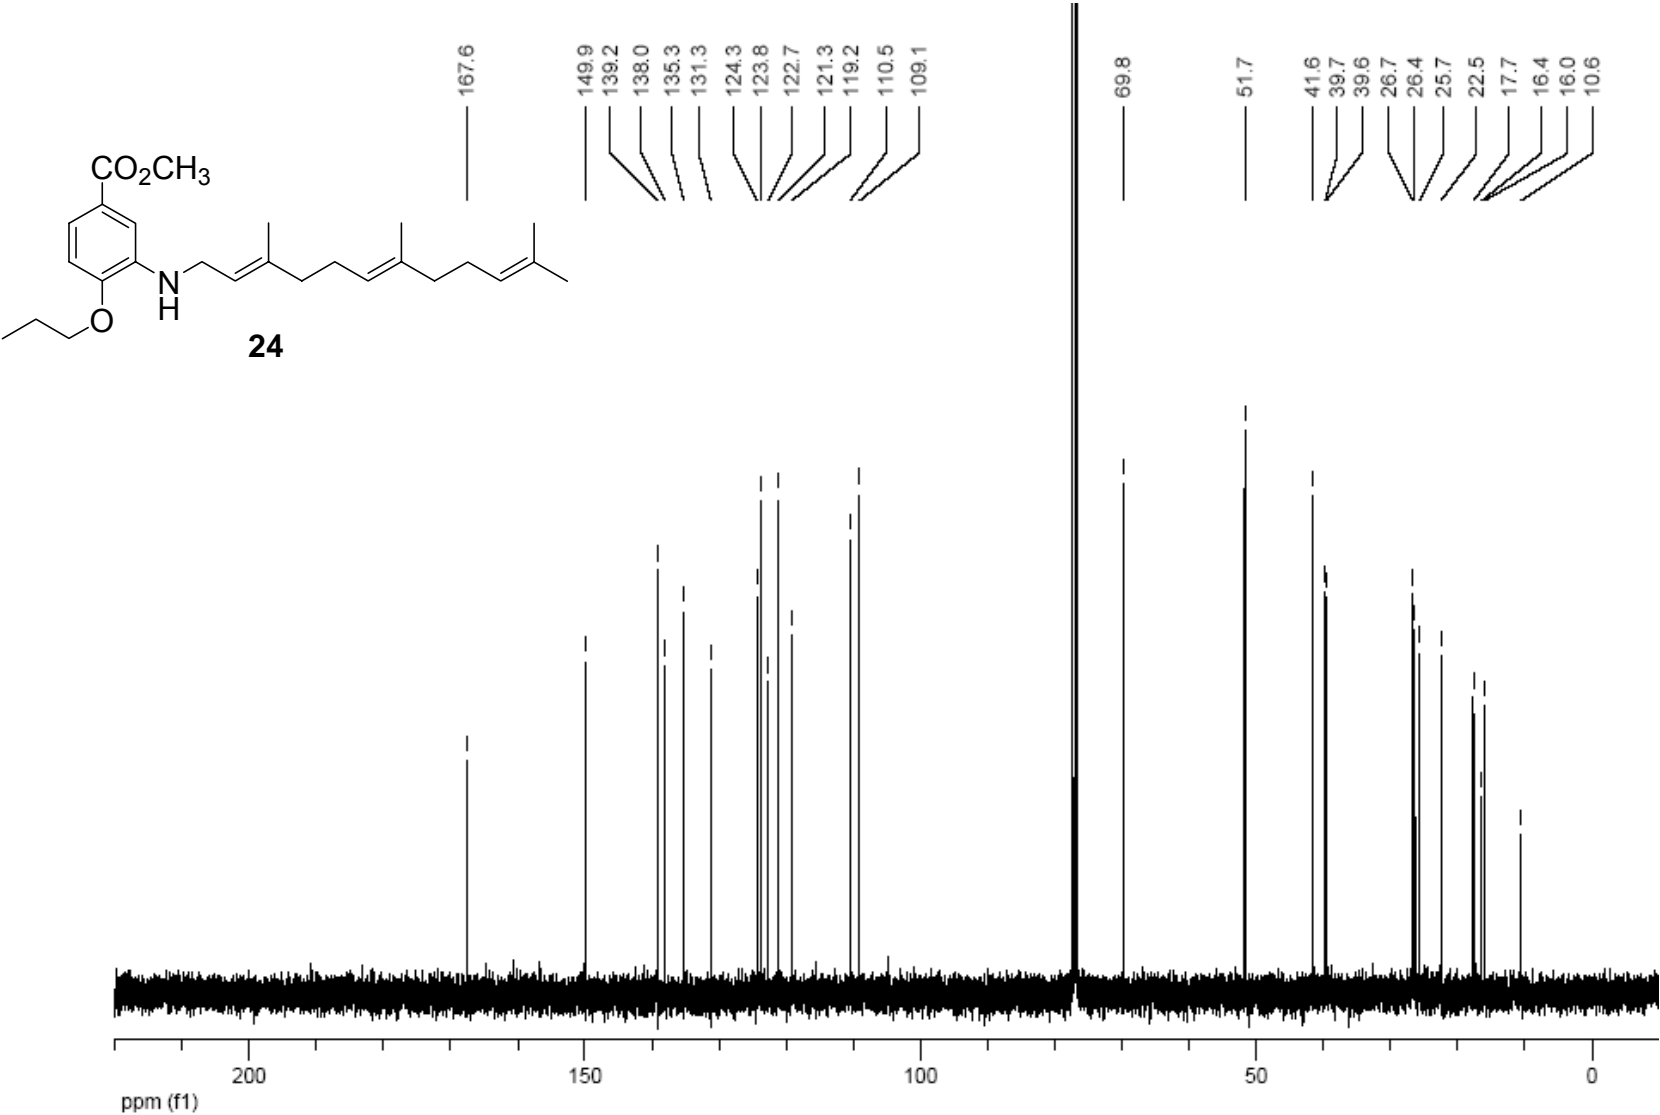

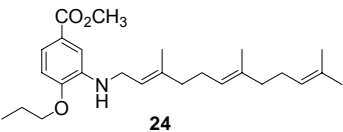

gCOSY

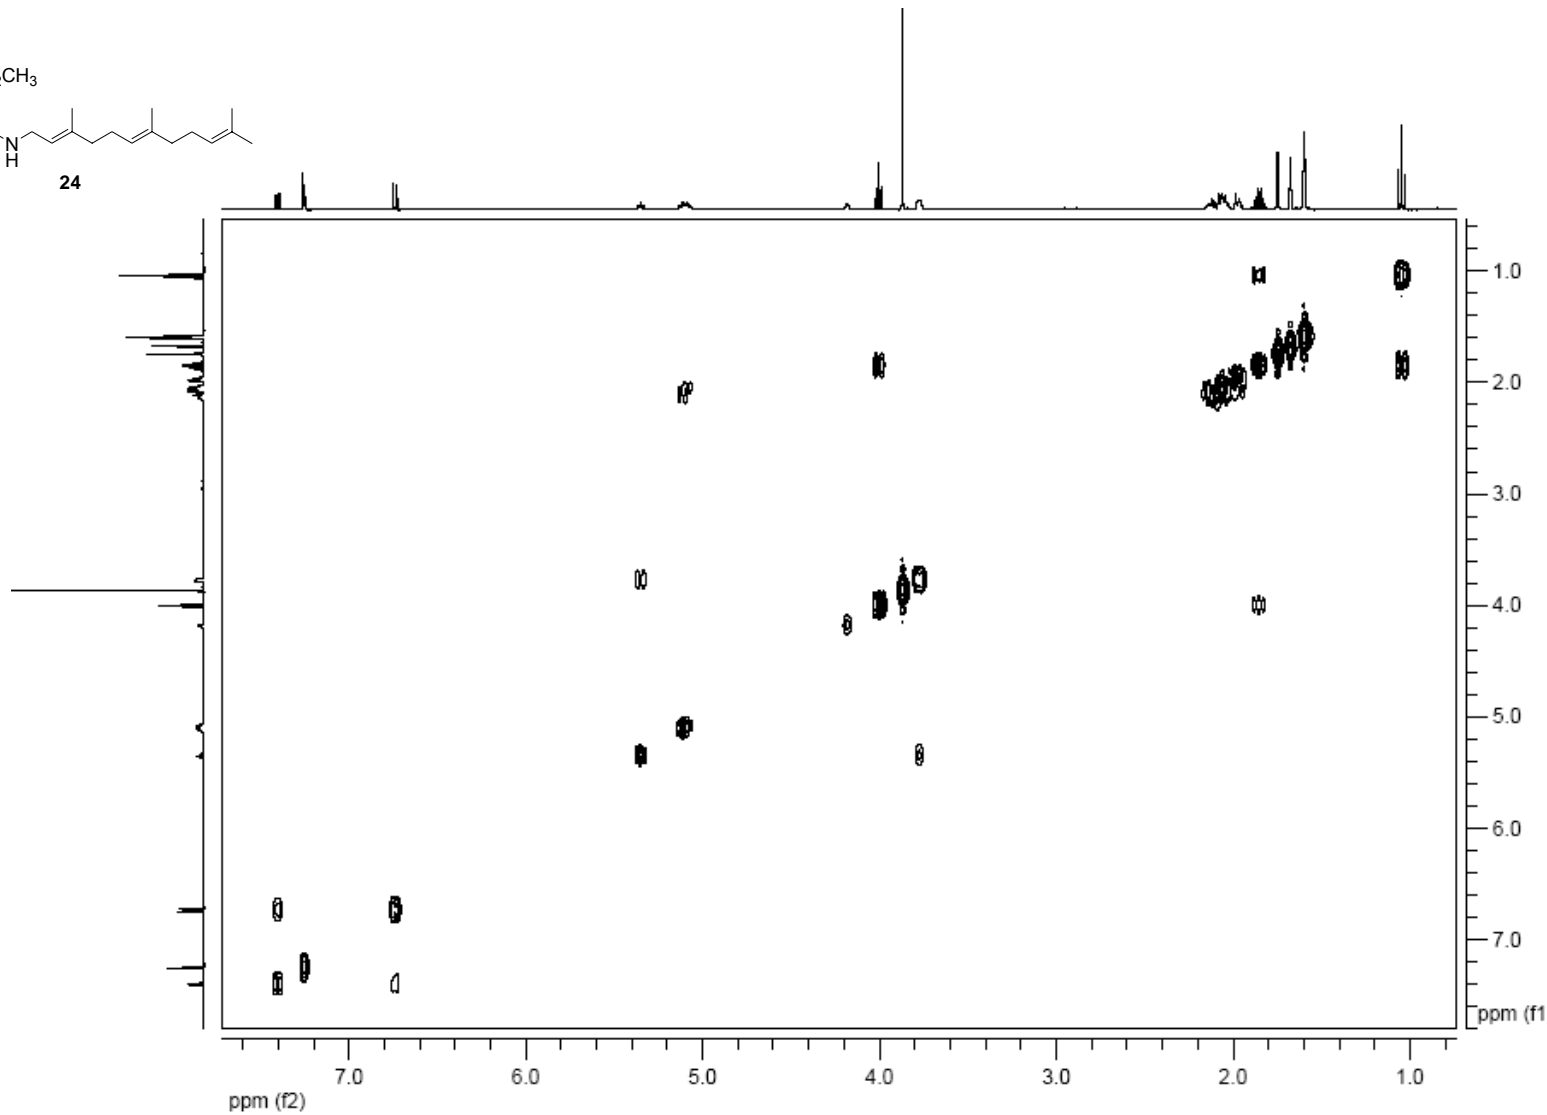

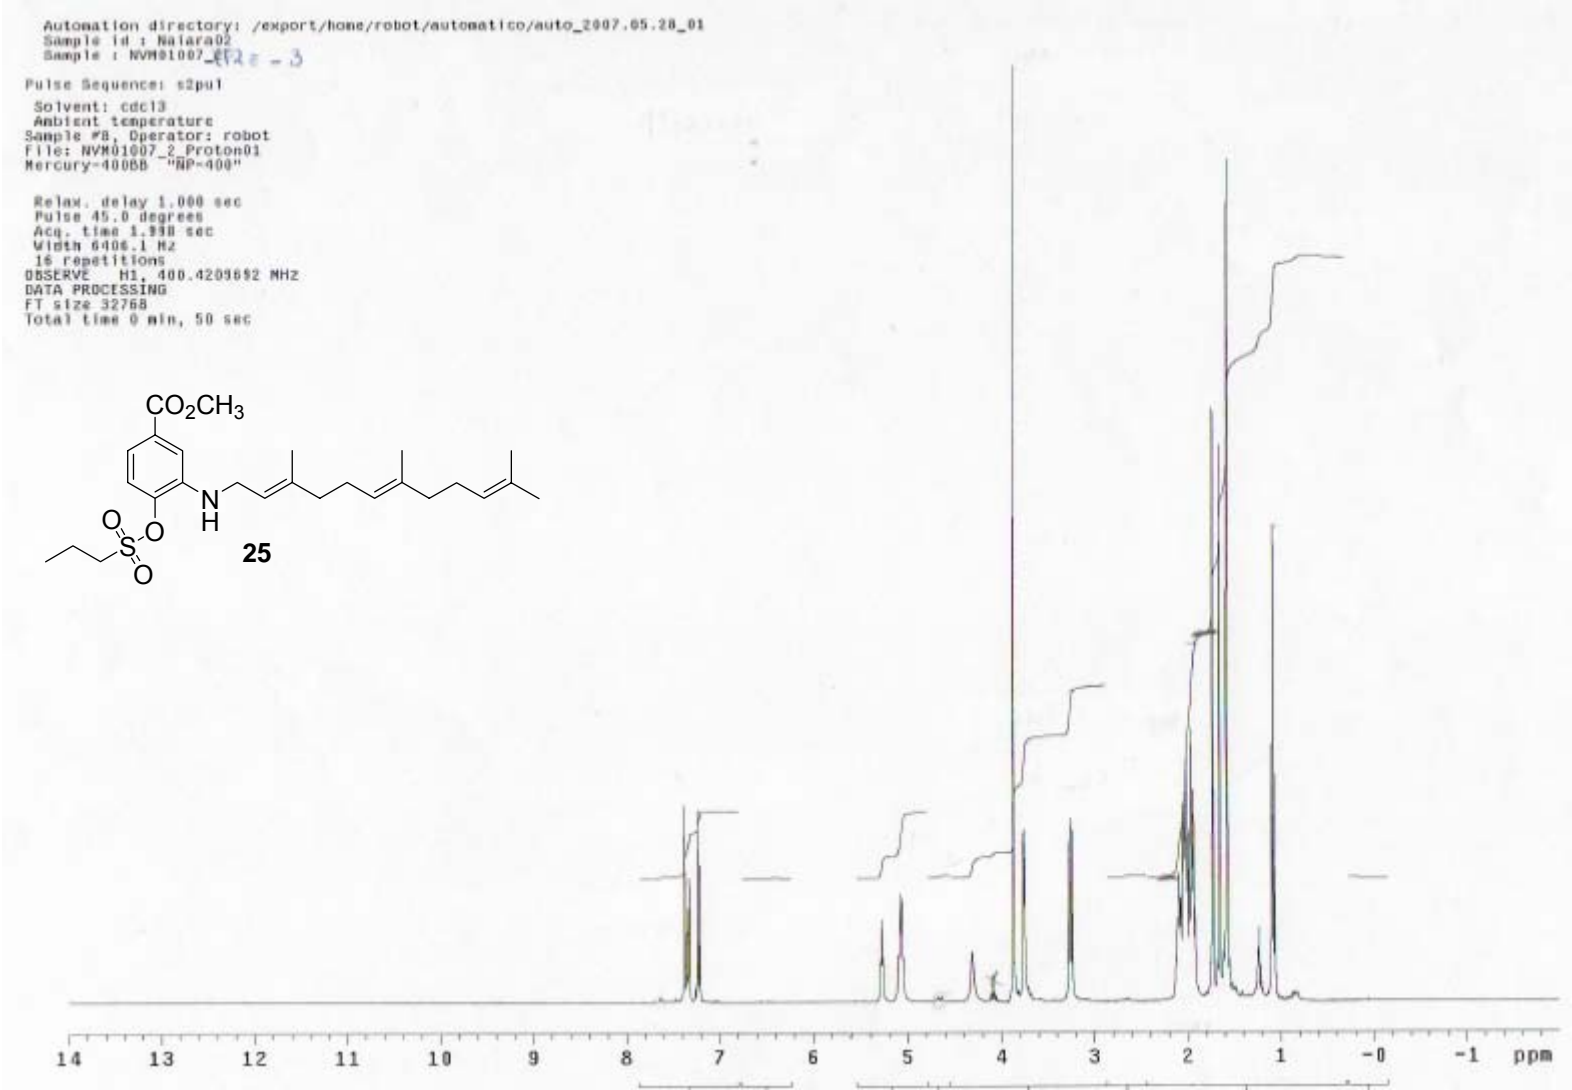

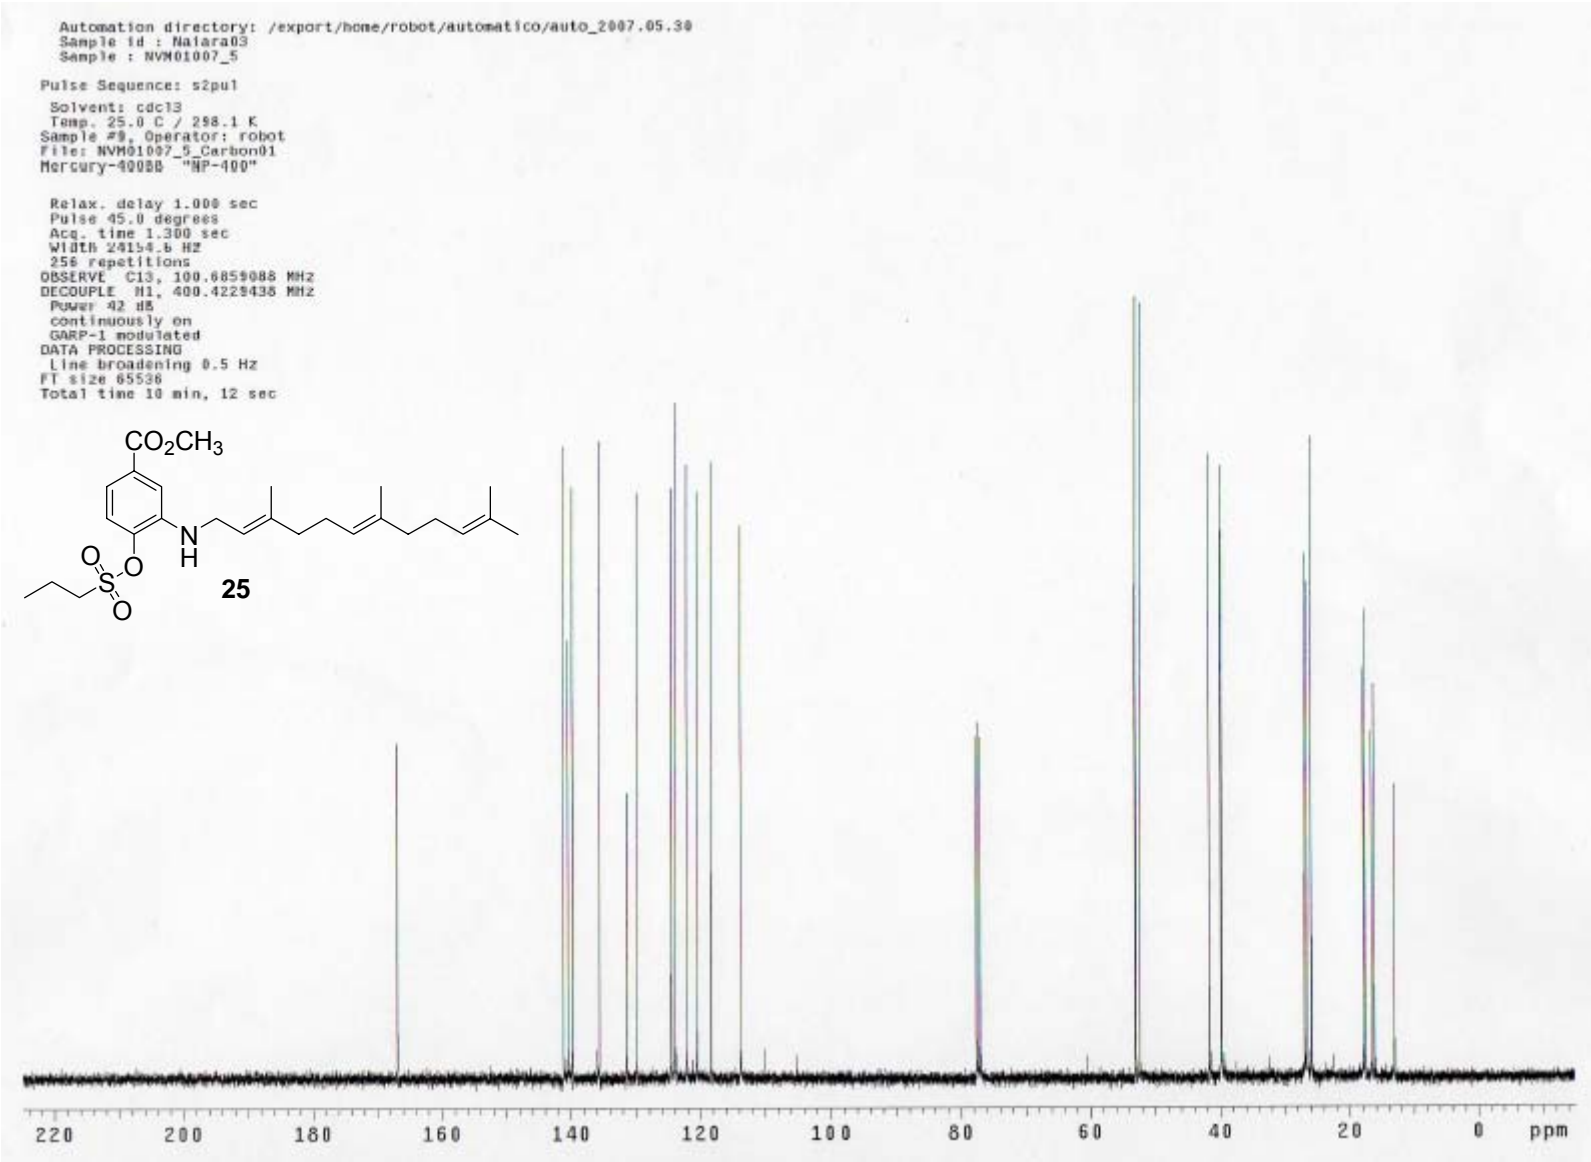

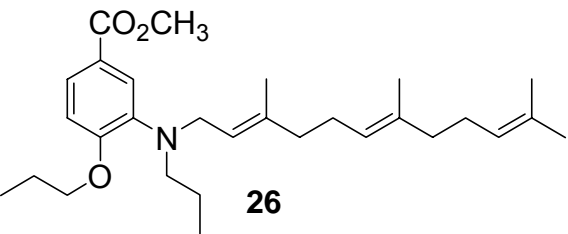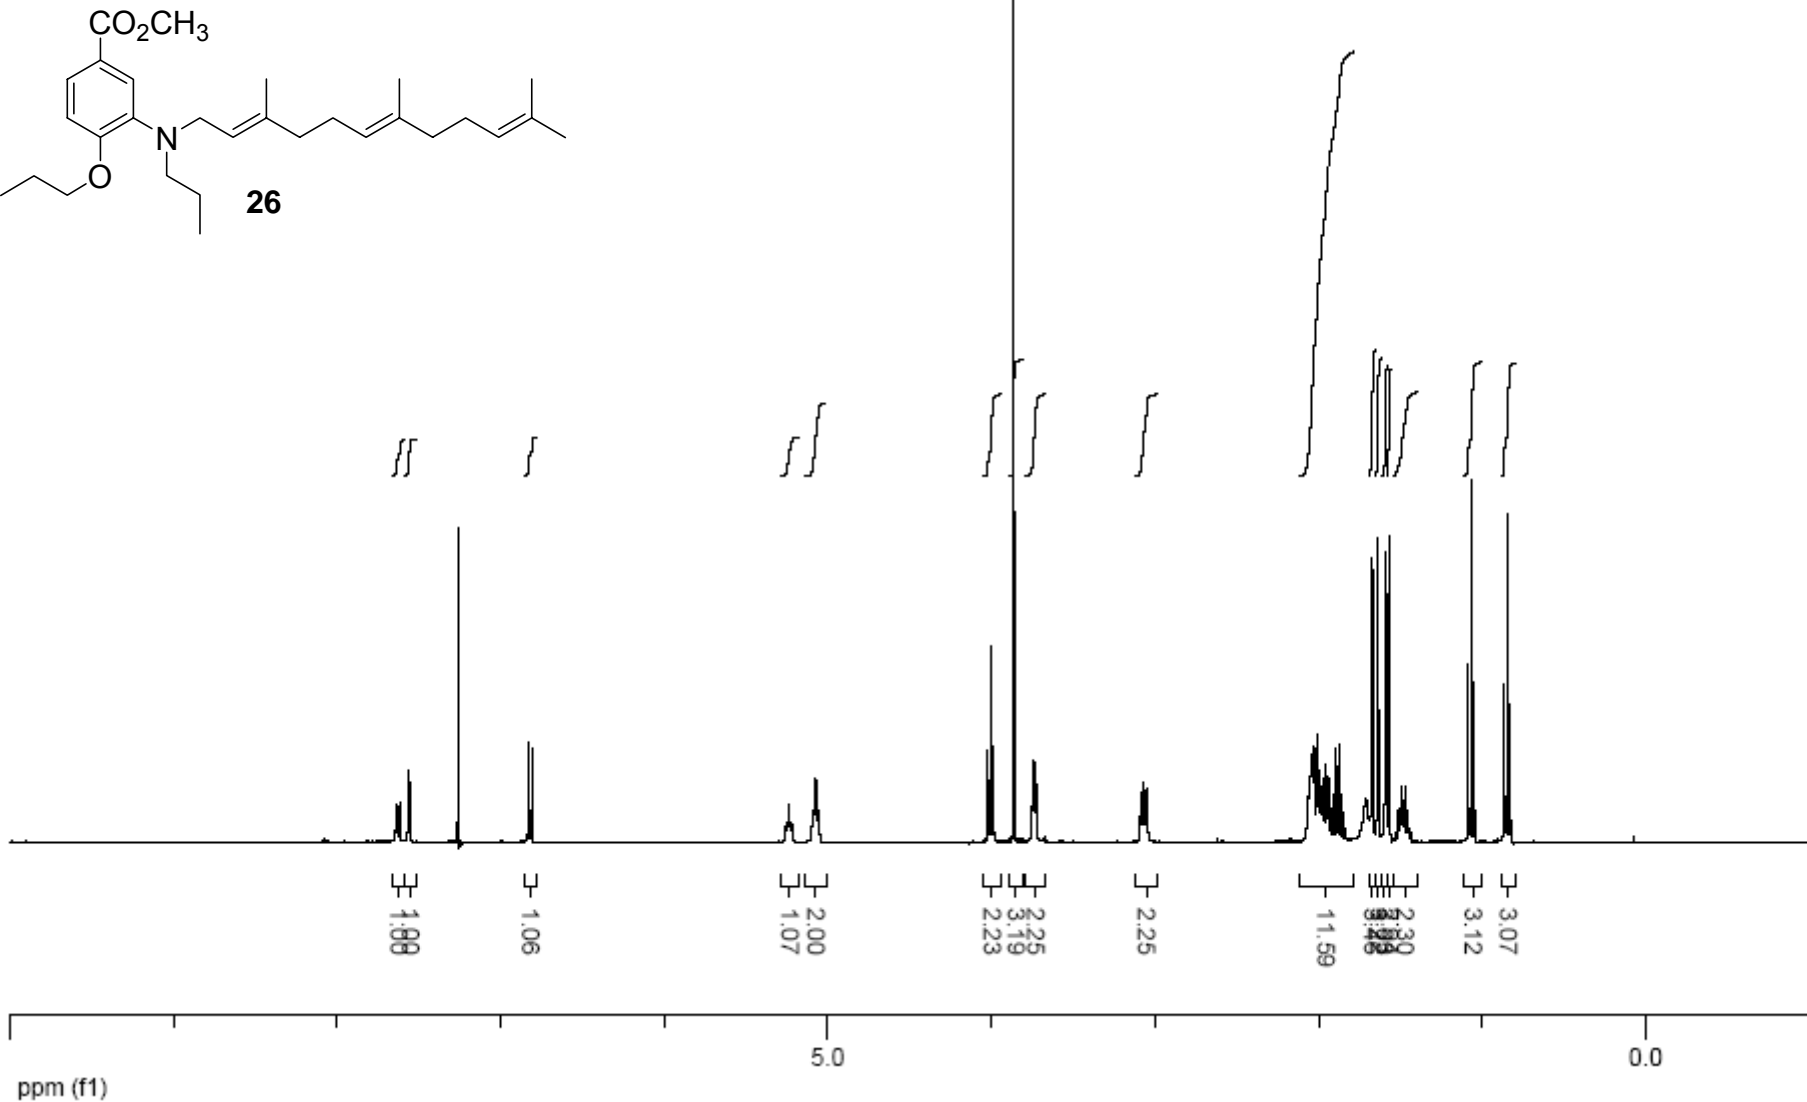



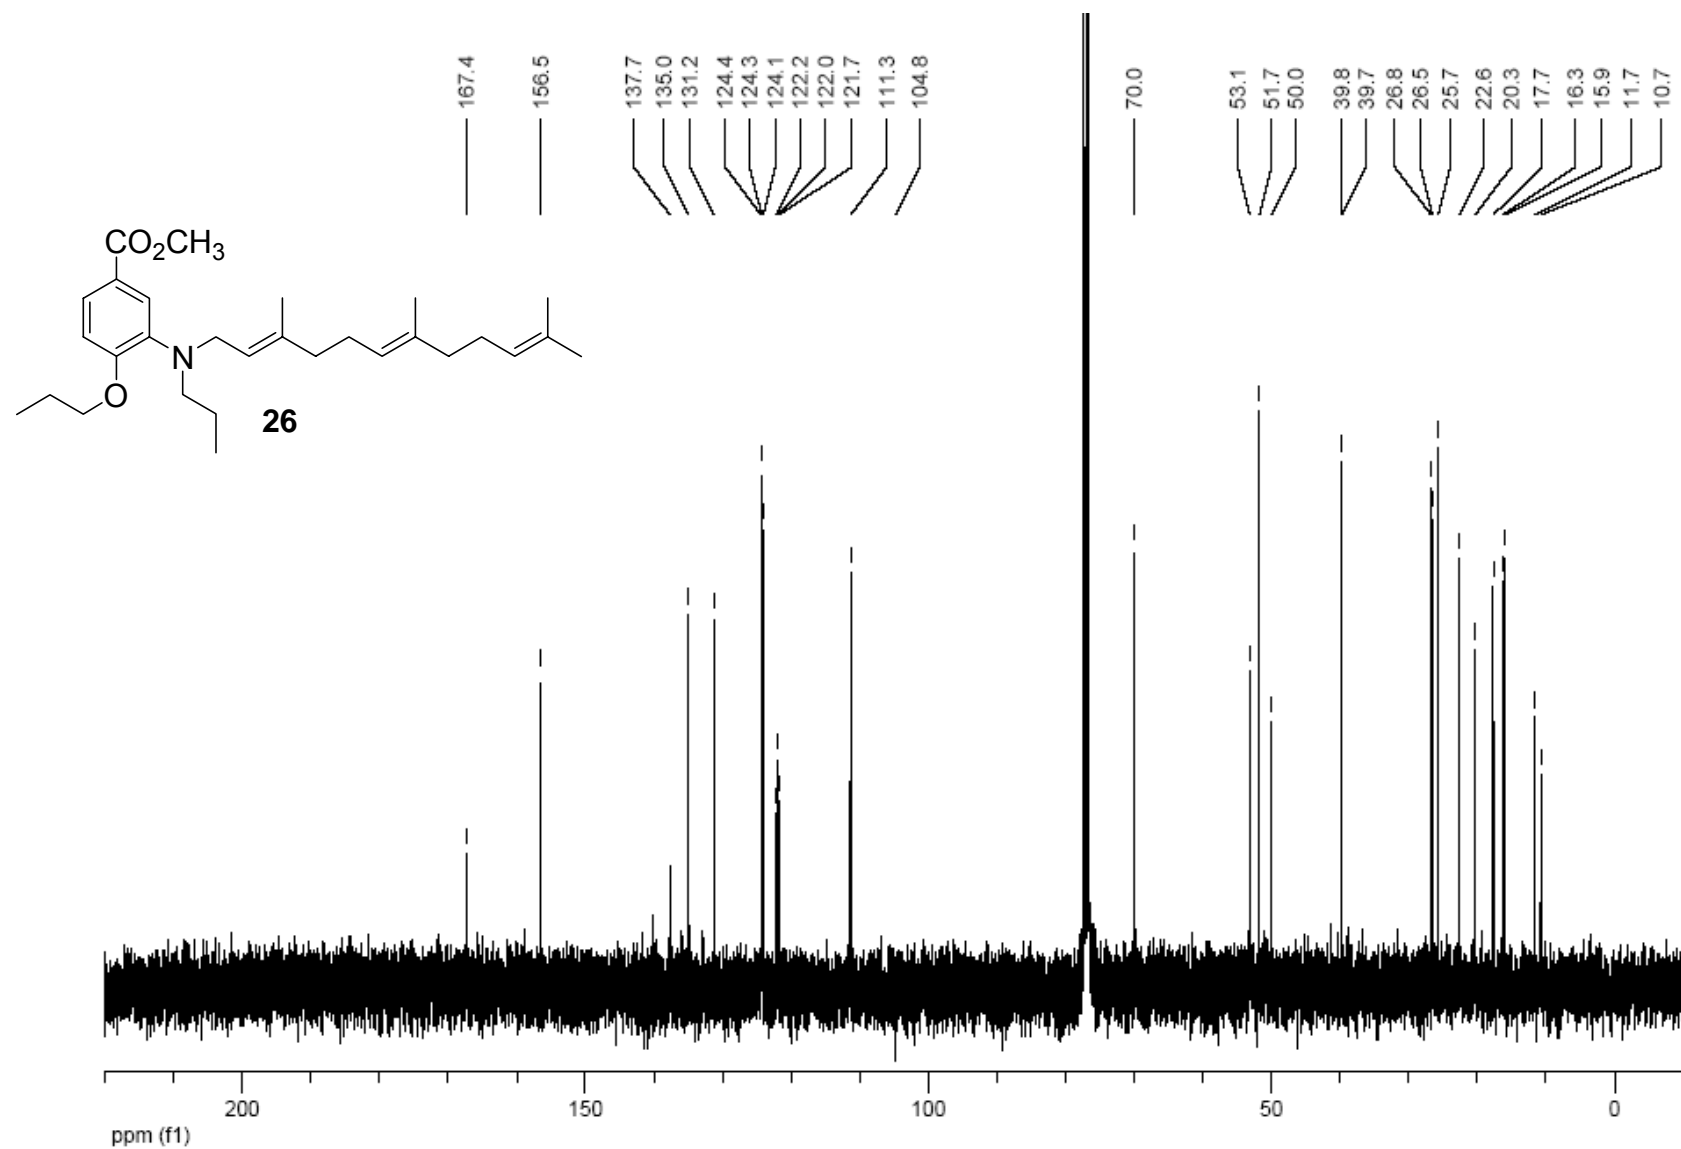

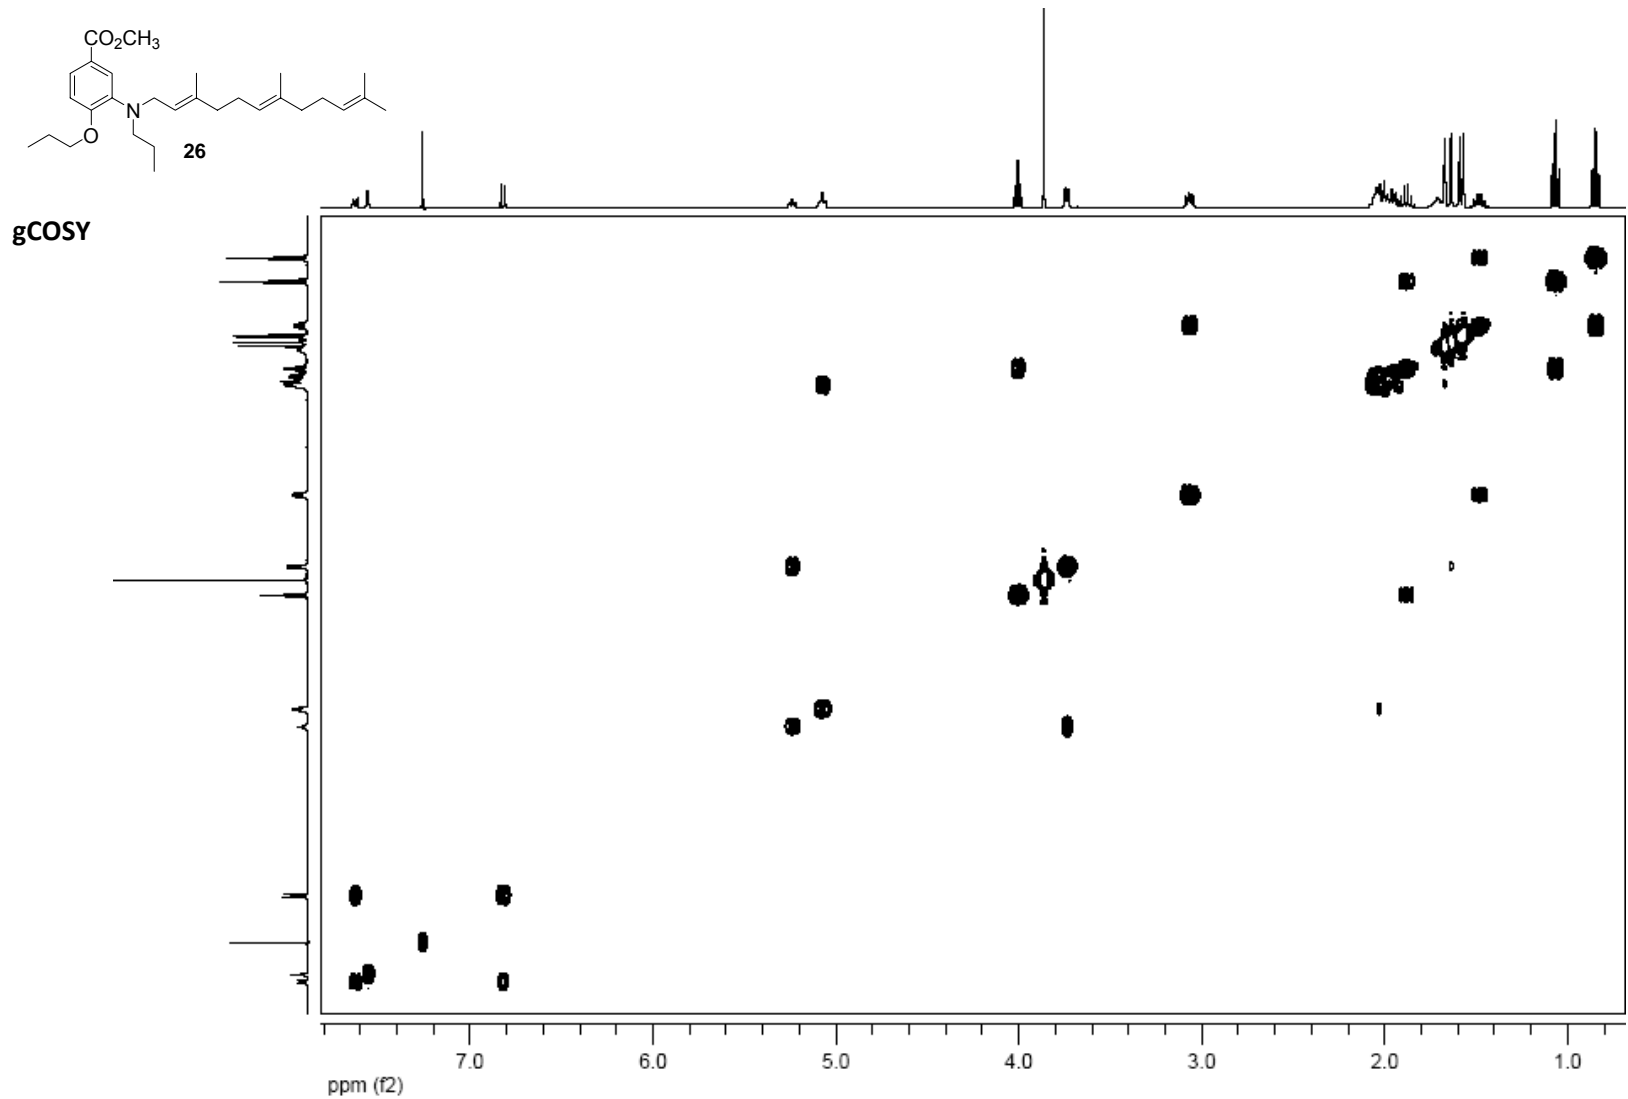

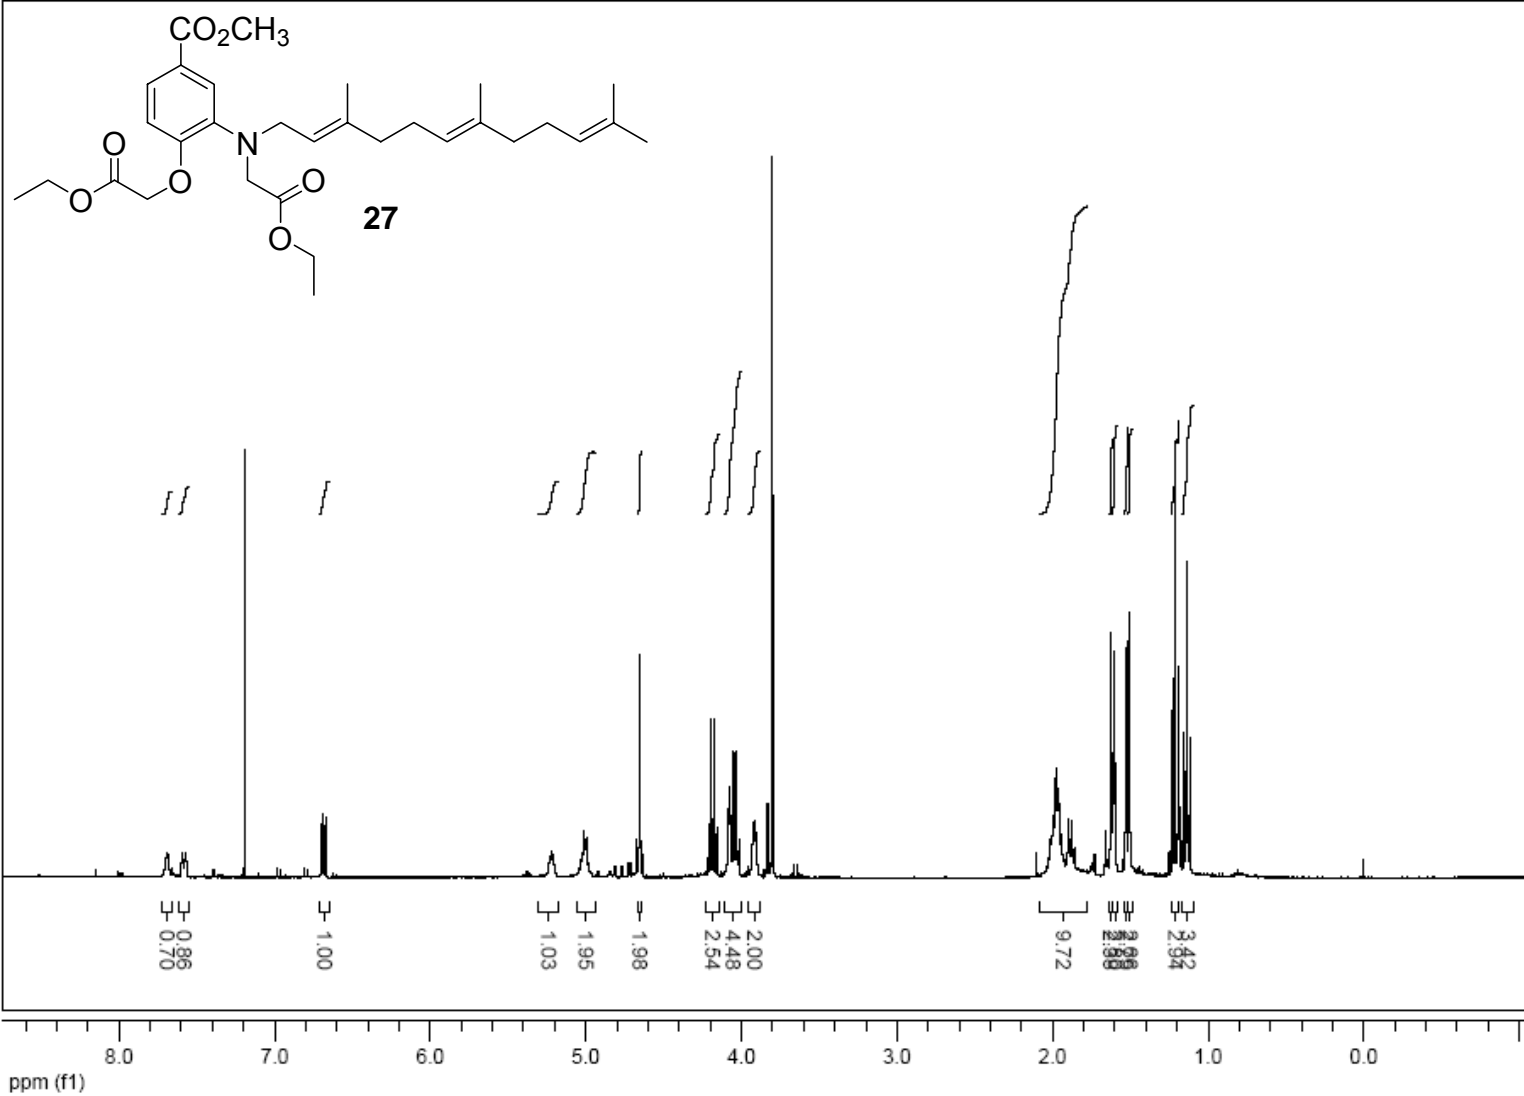

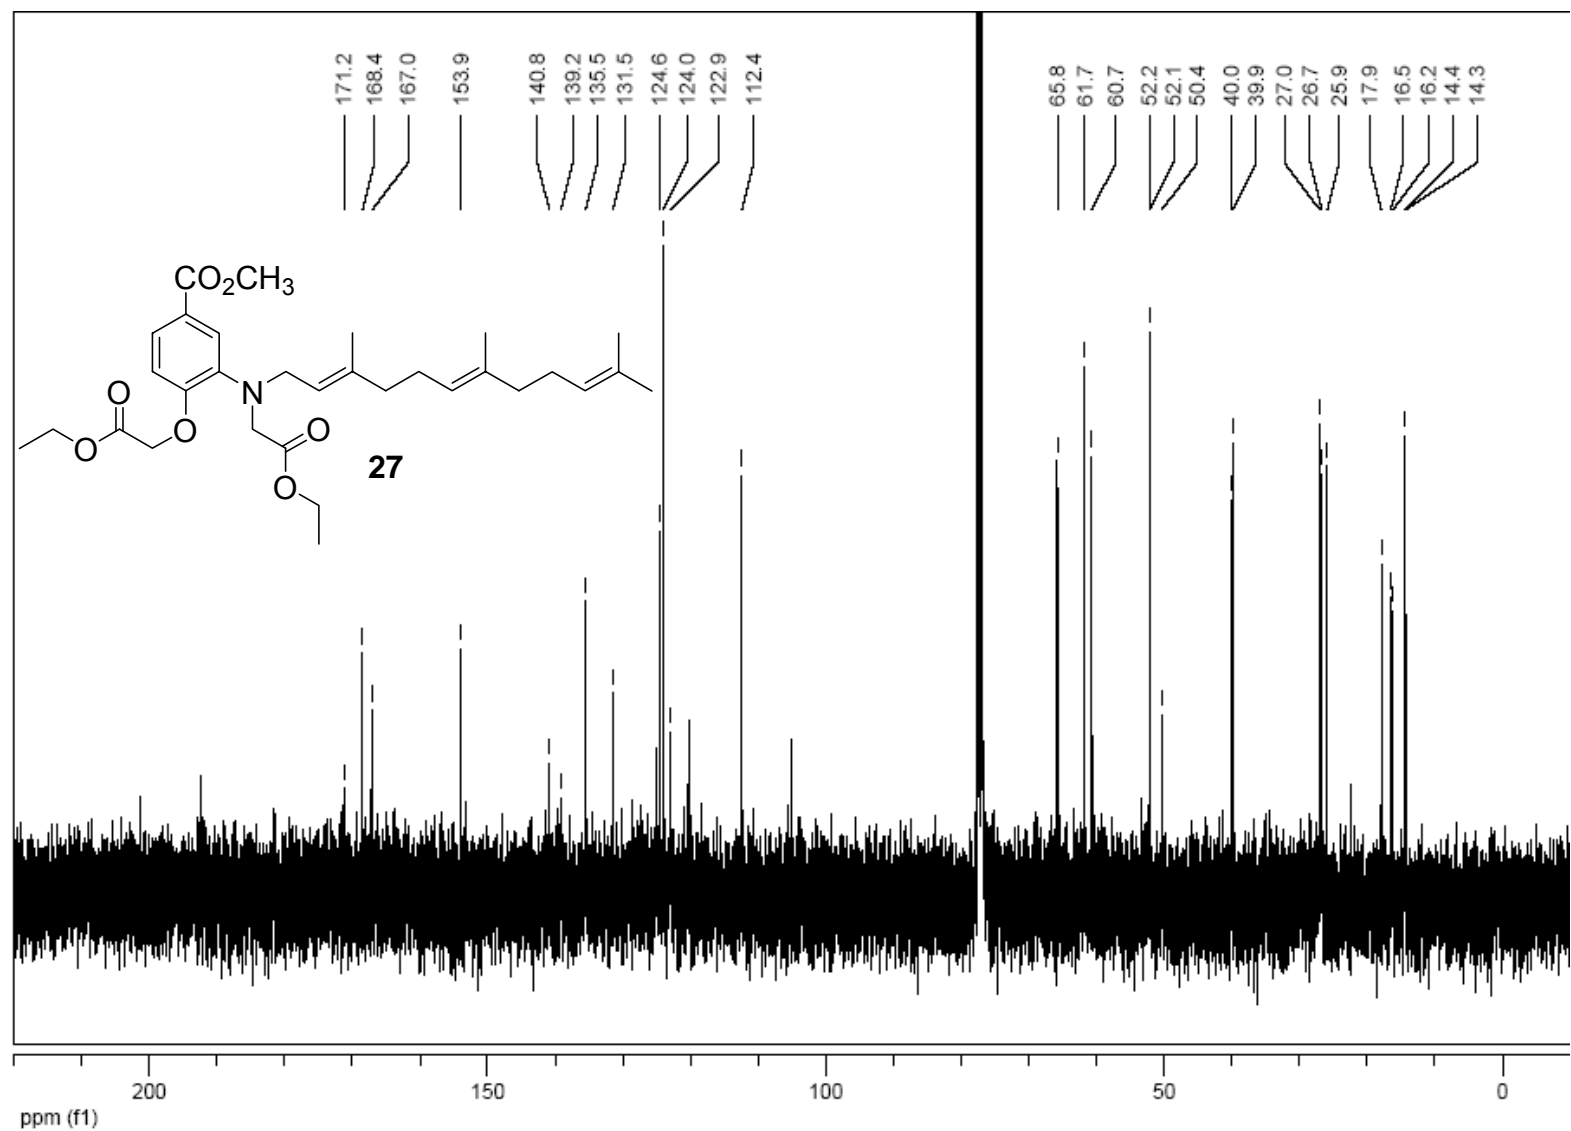

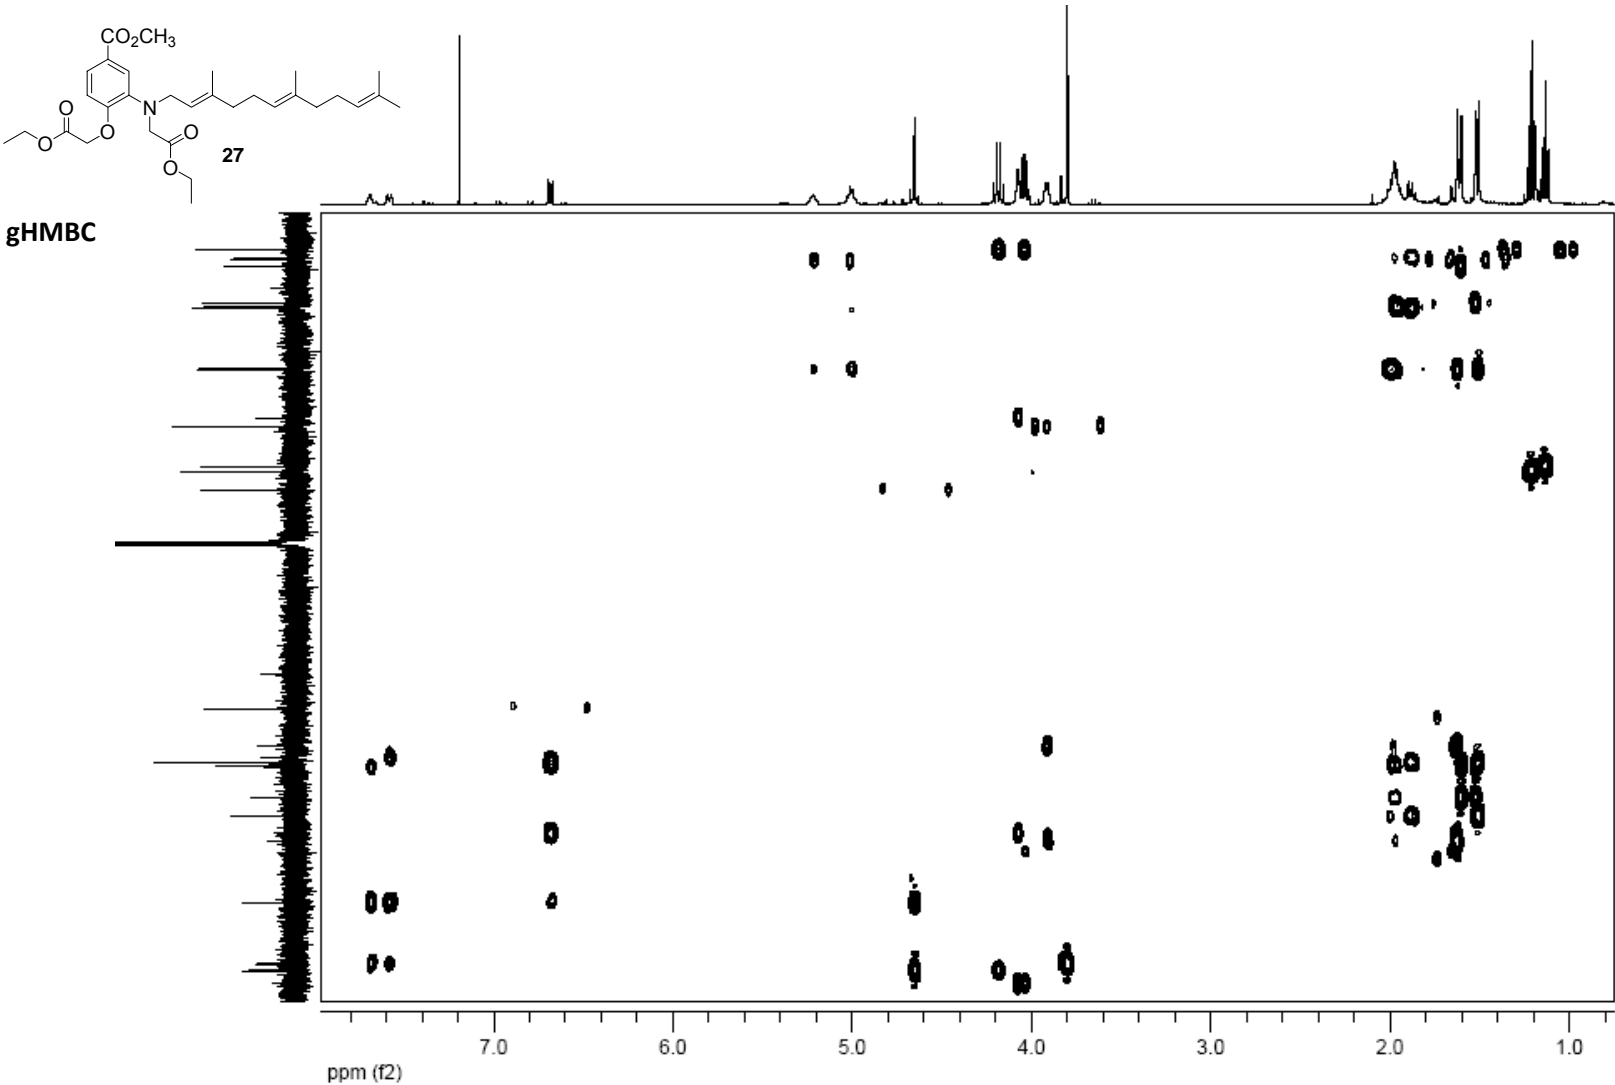

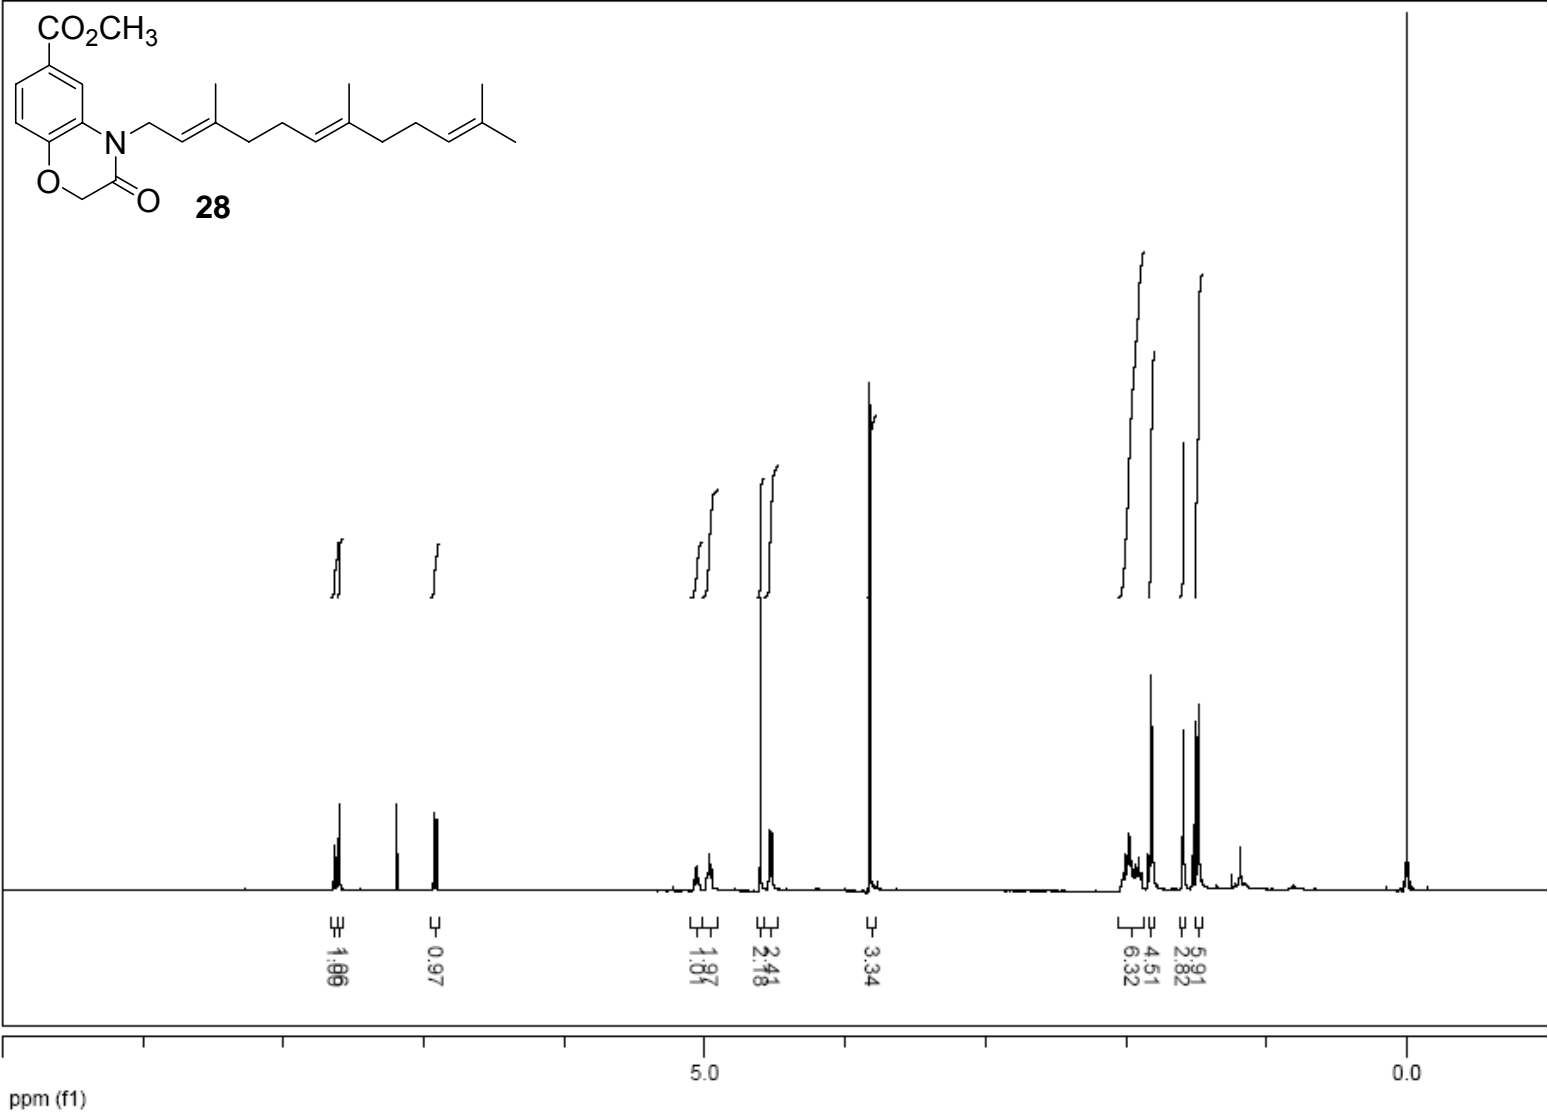

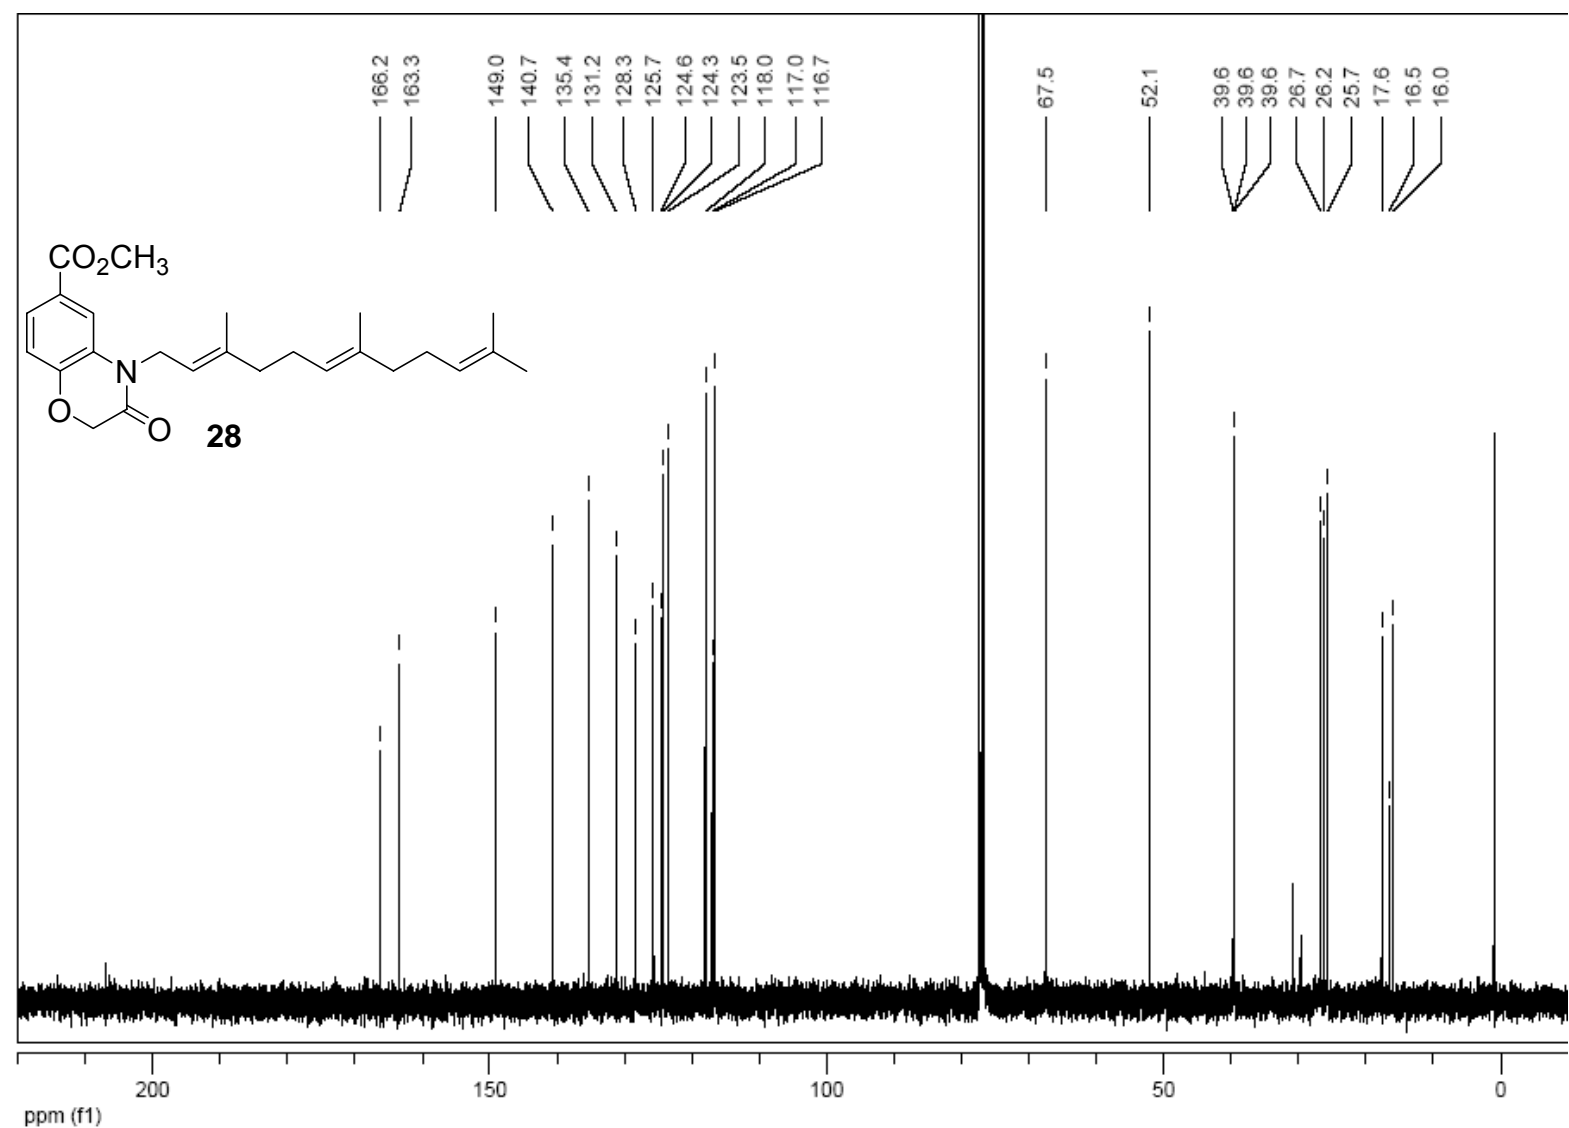

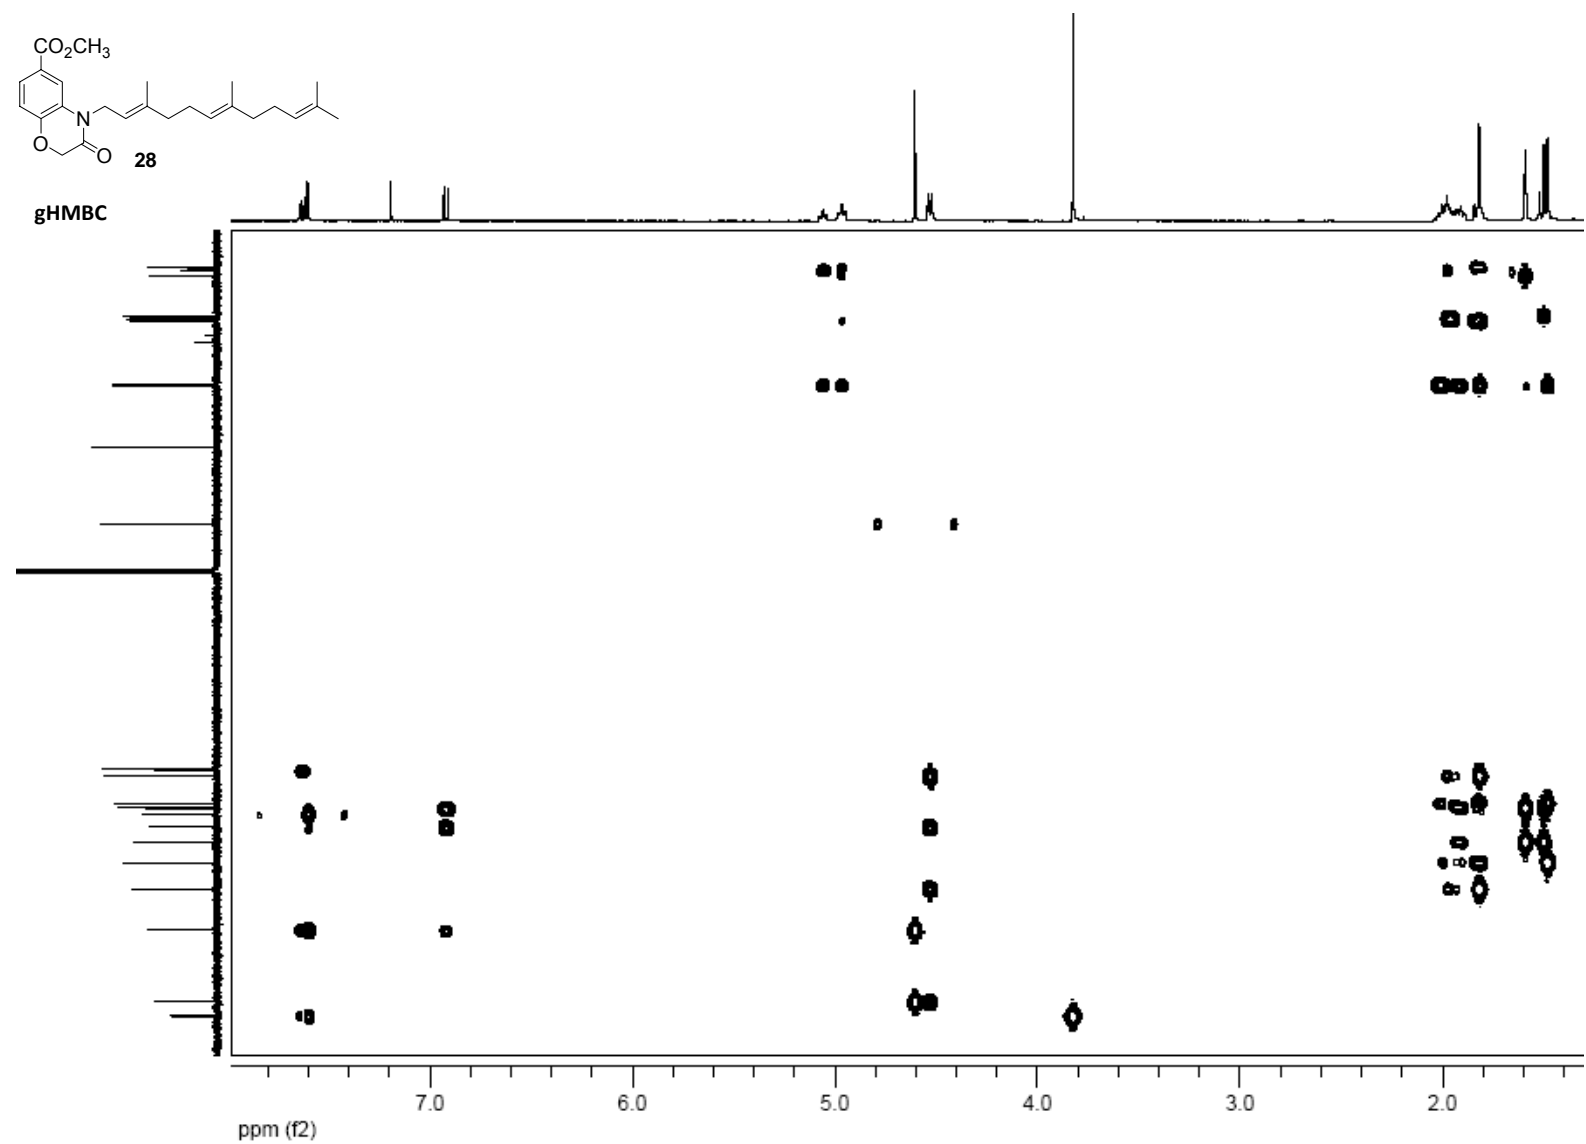



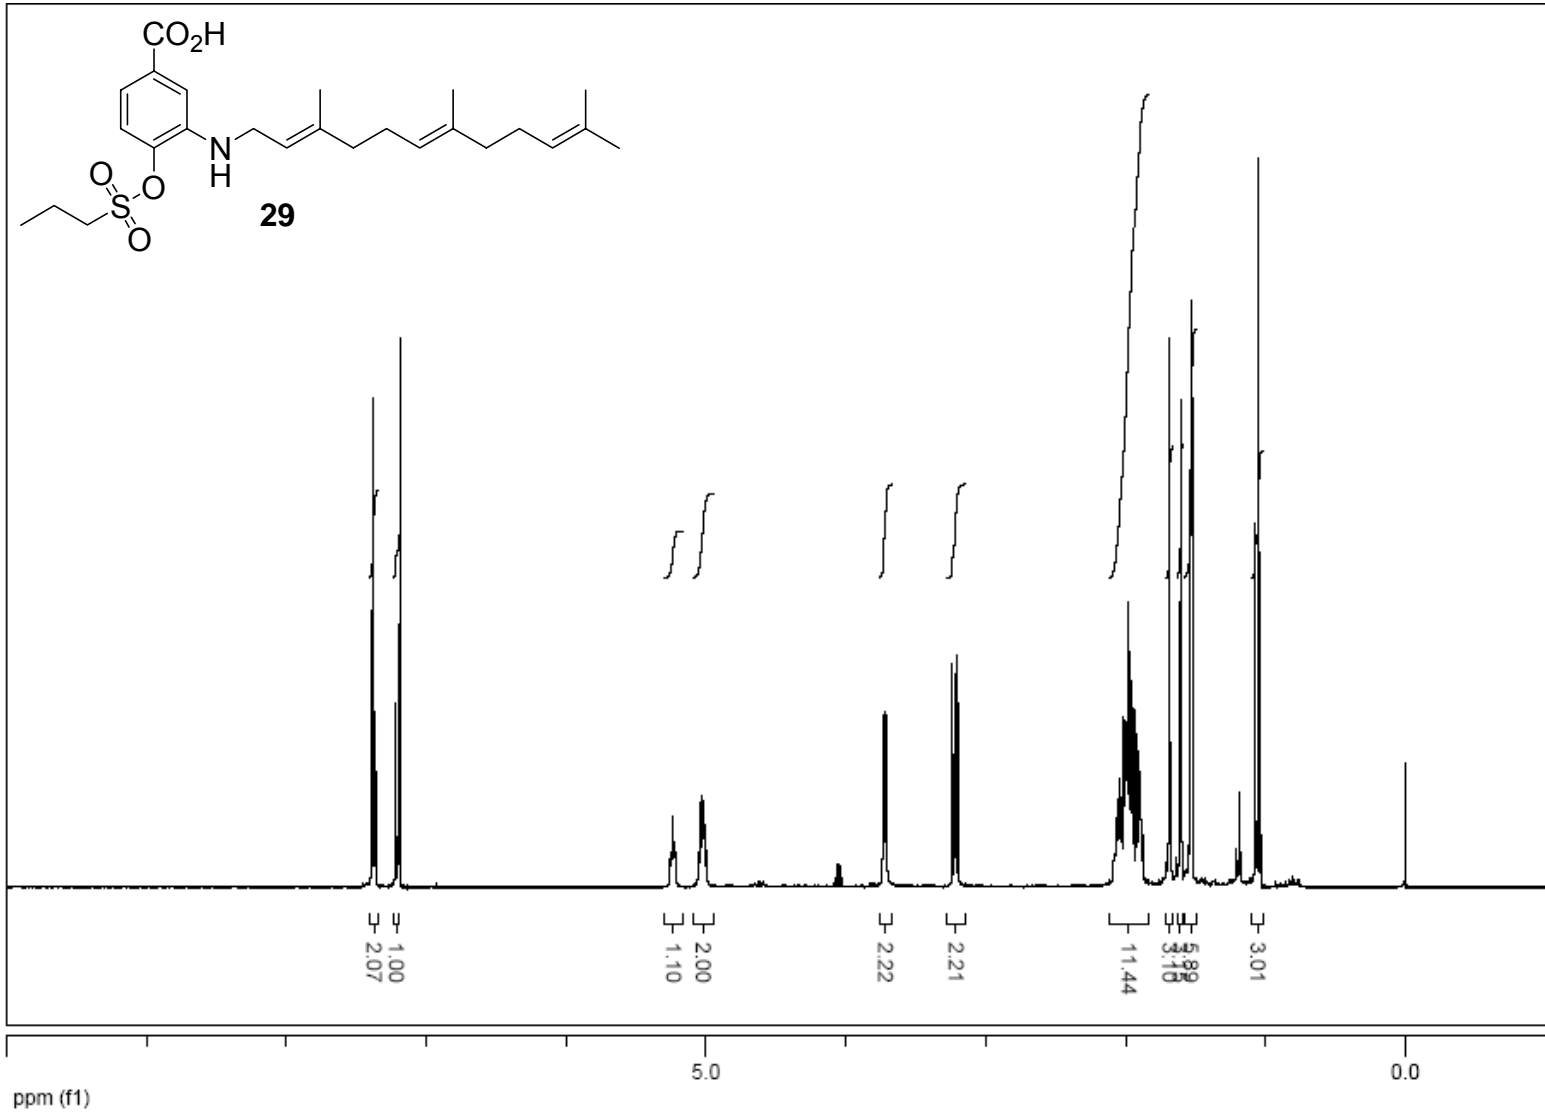

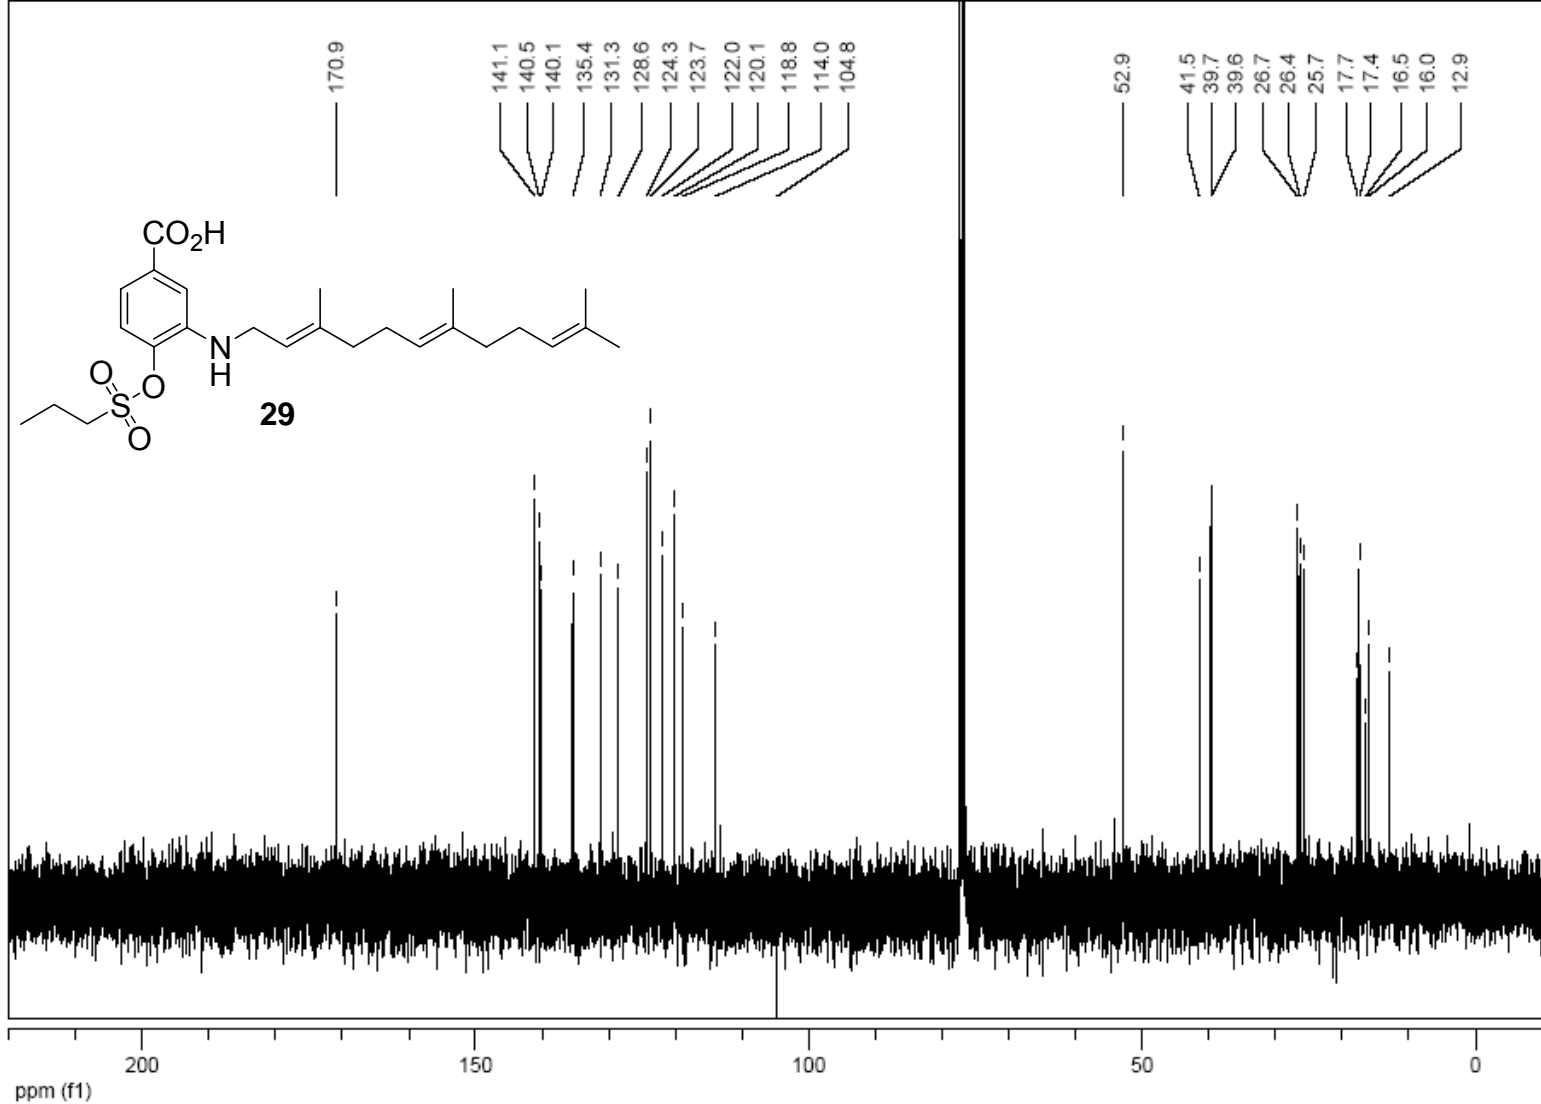

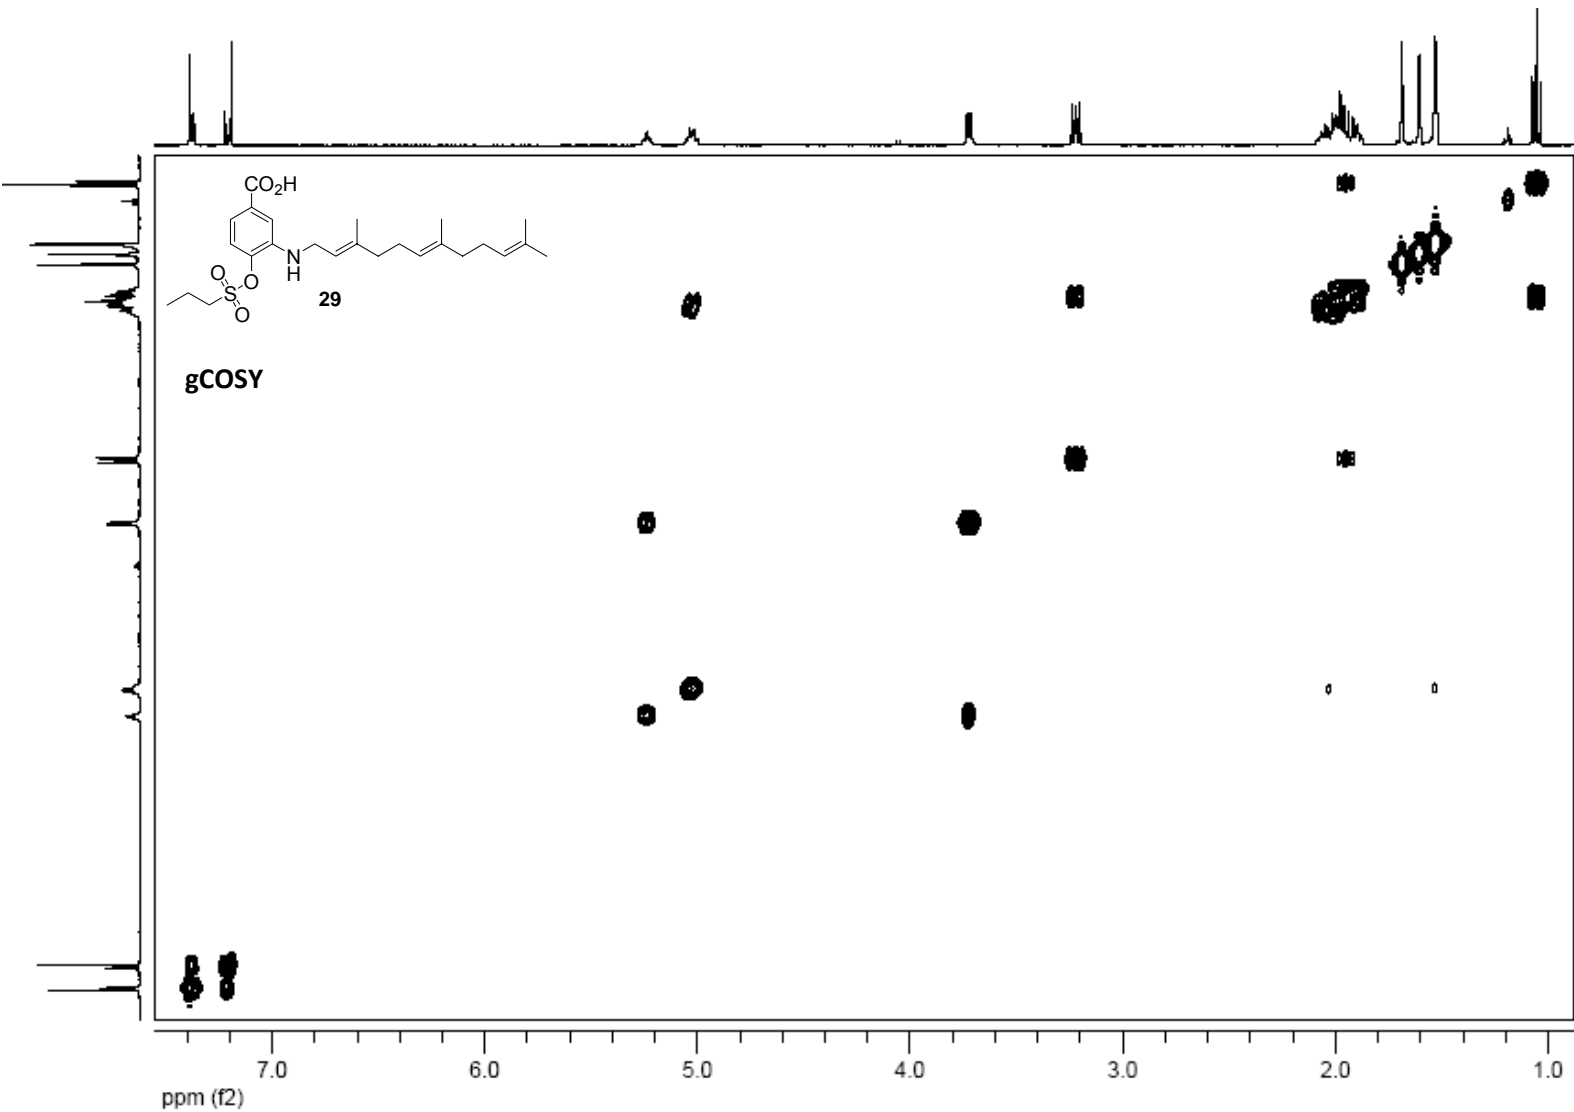

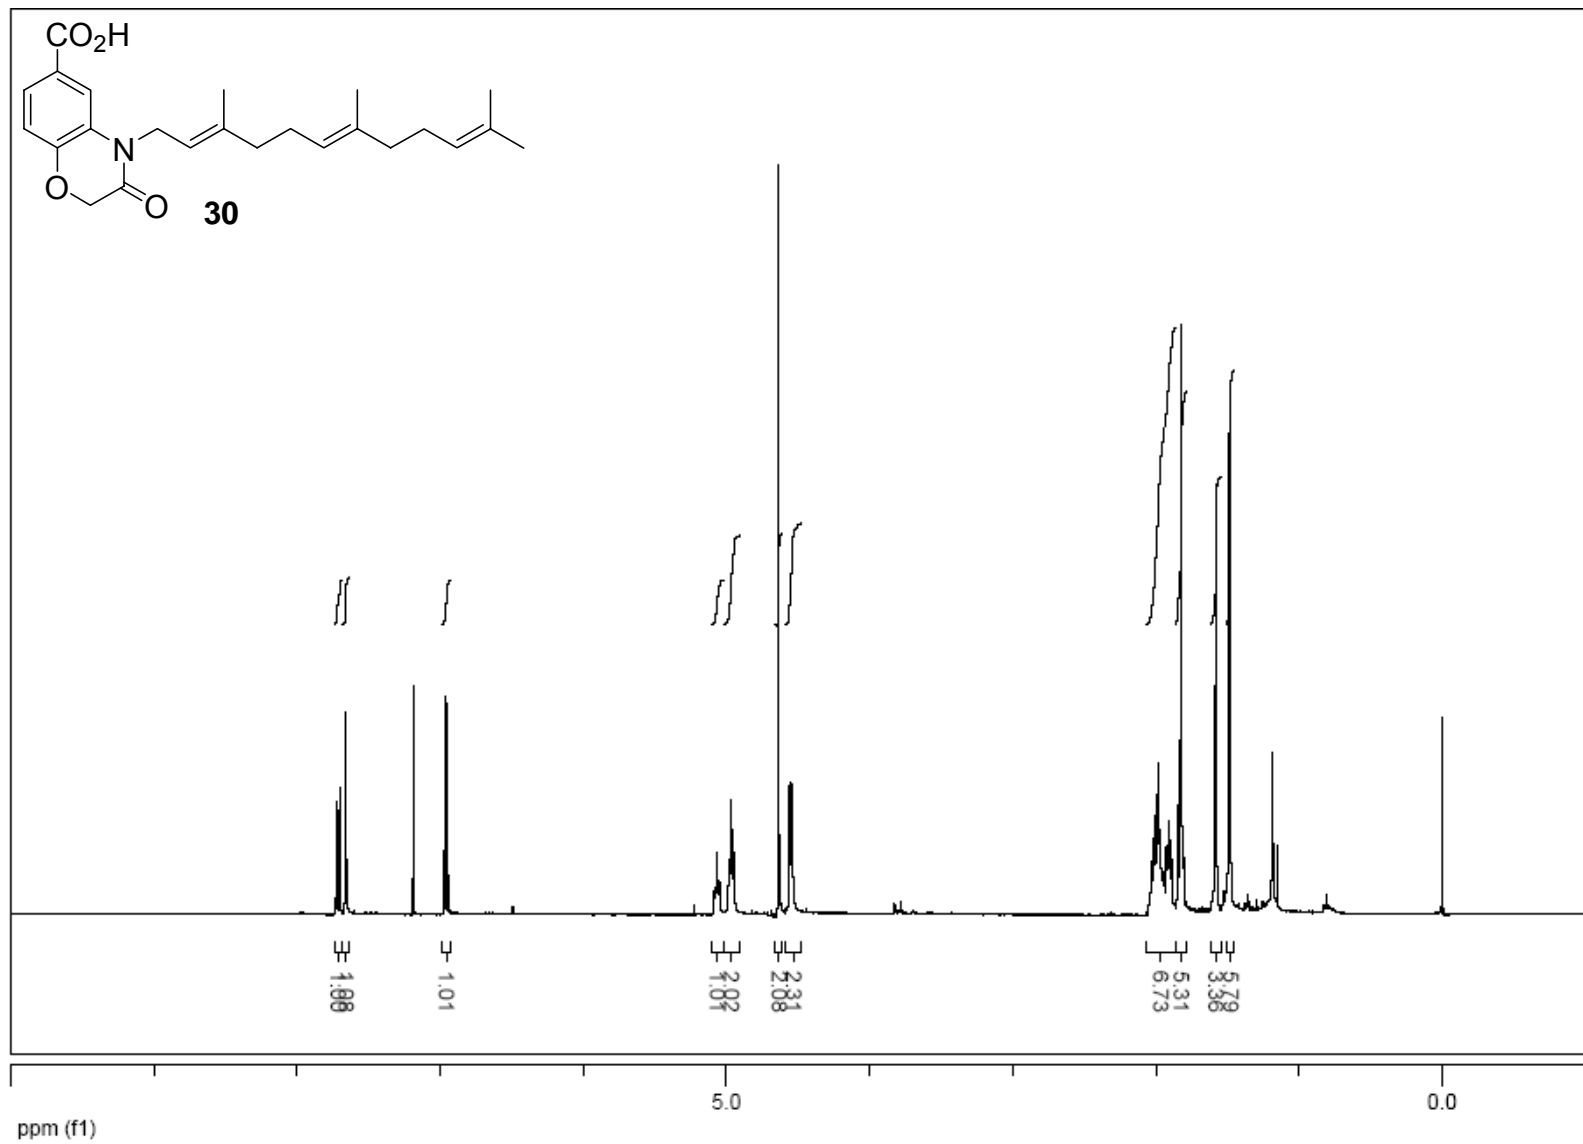

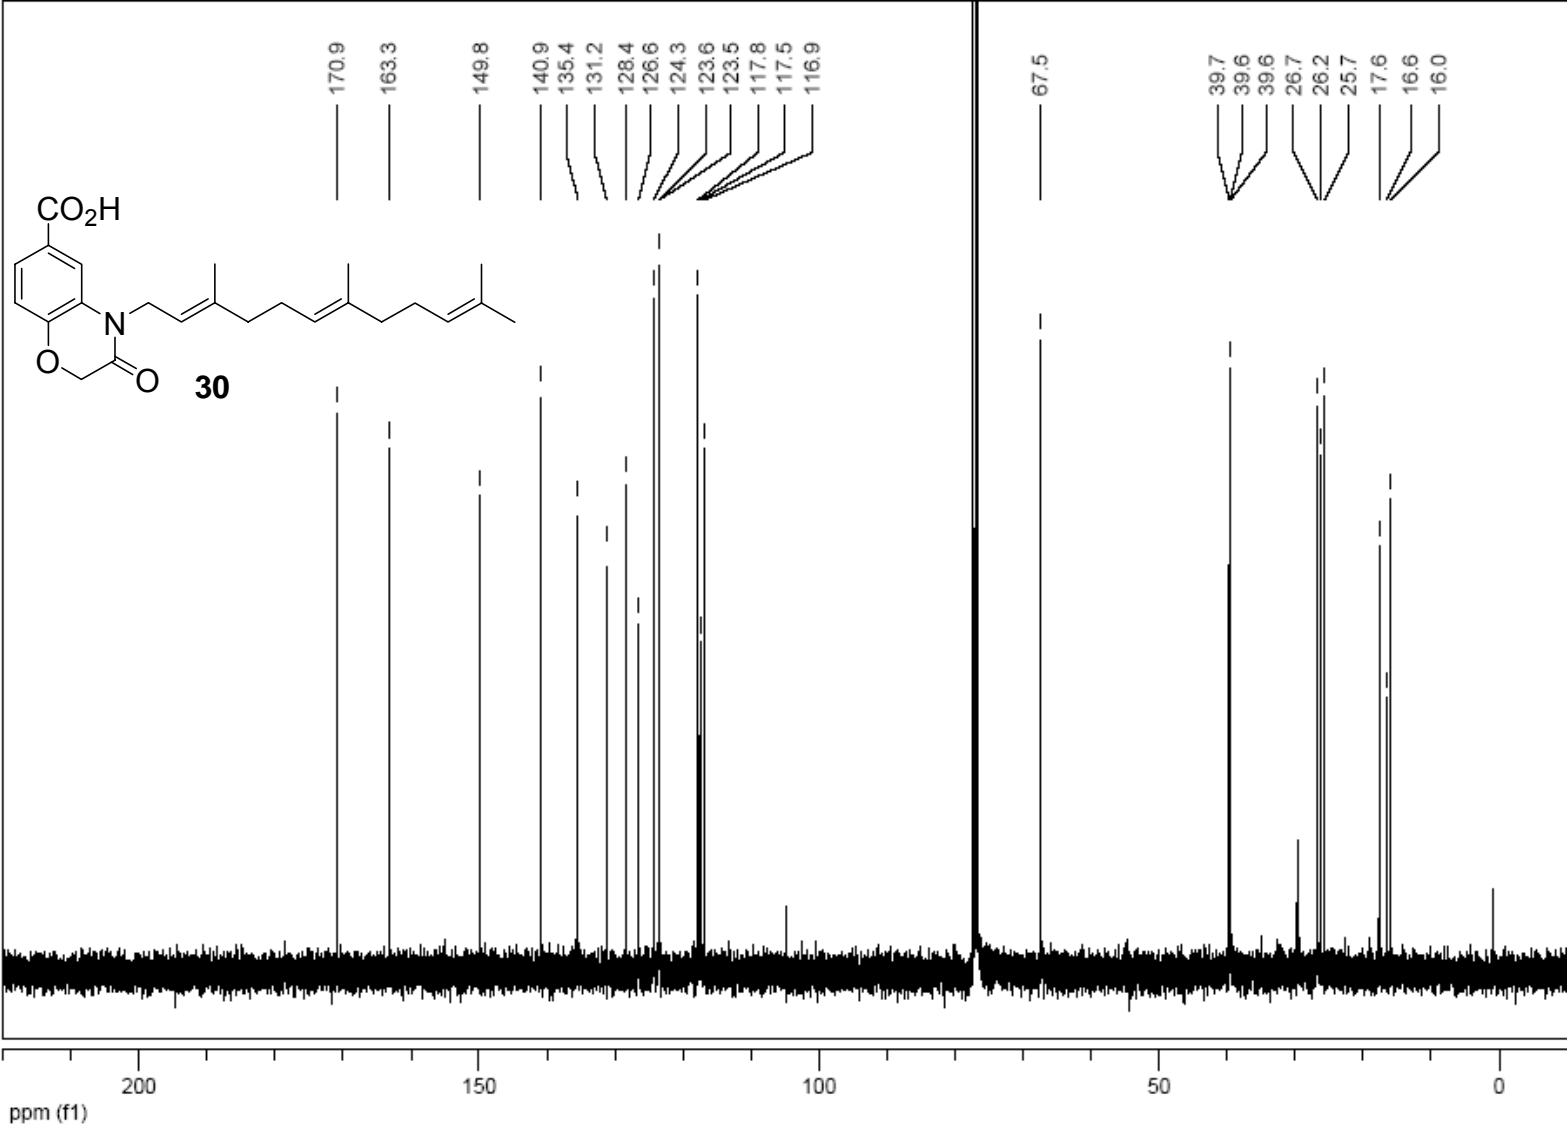

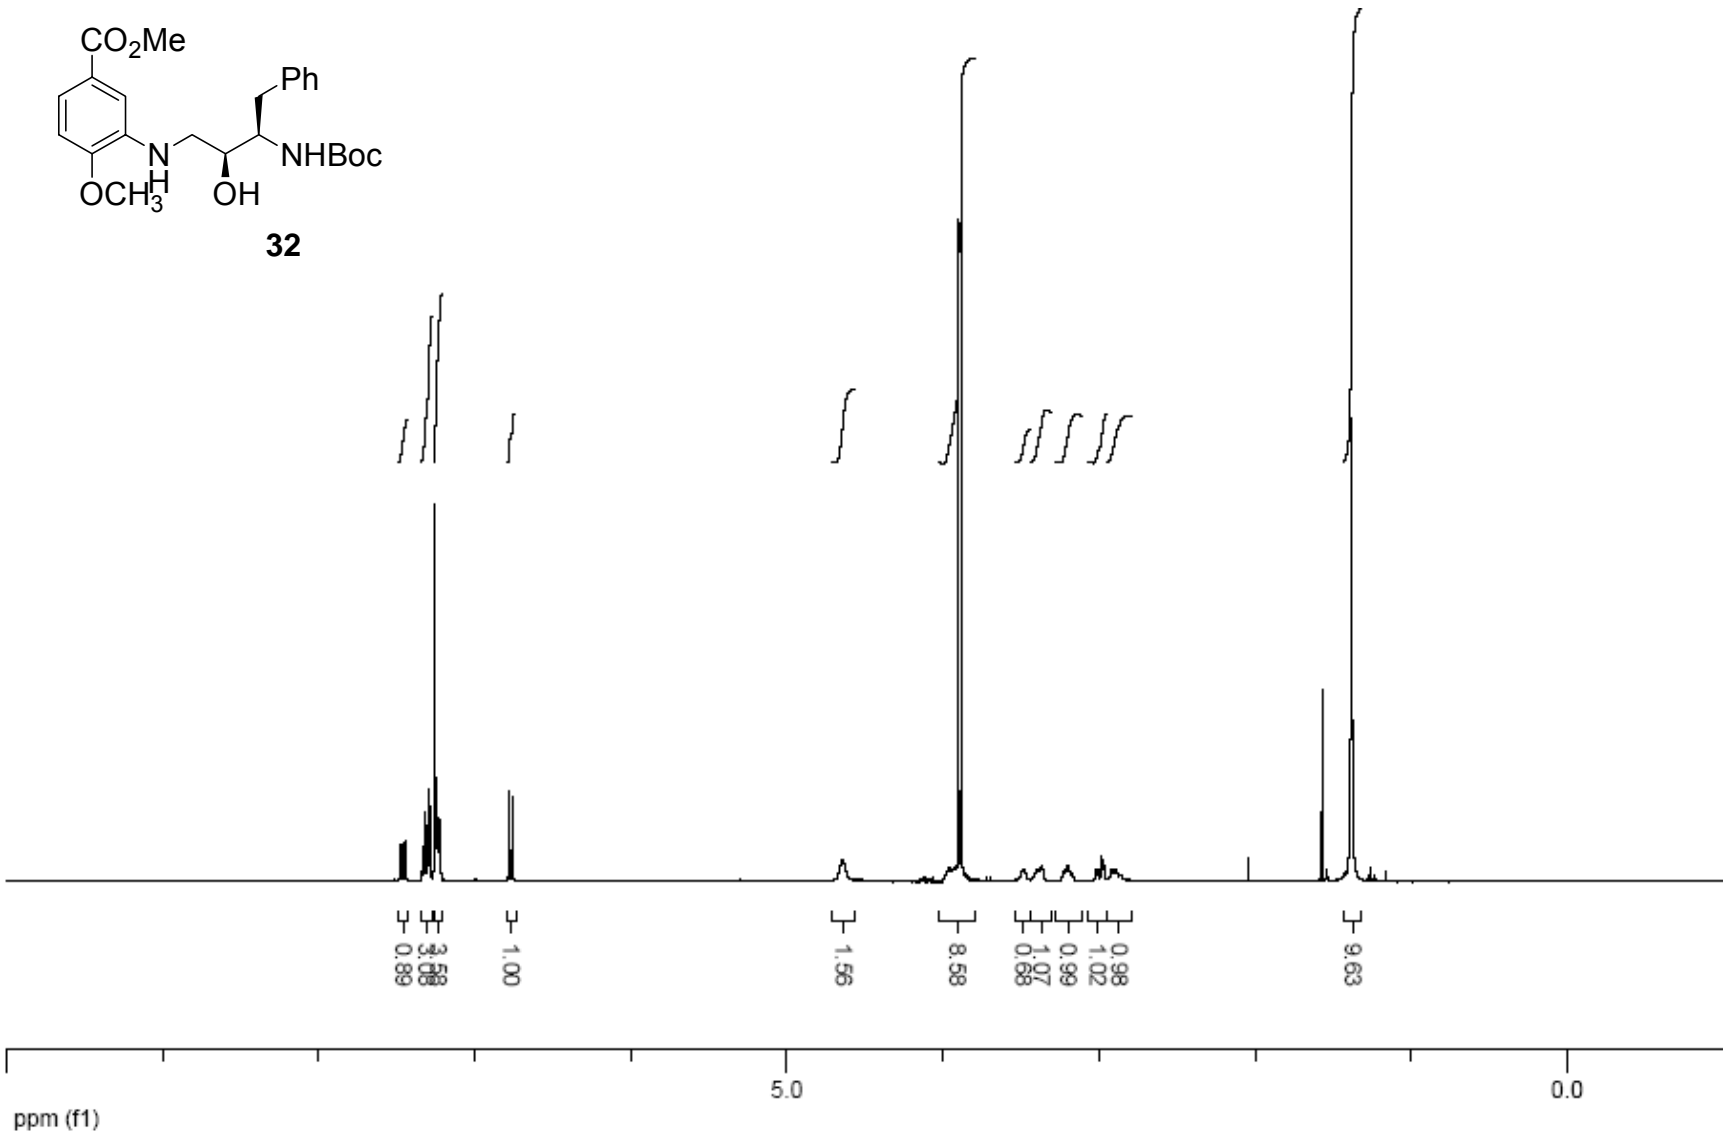

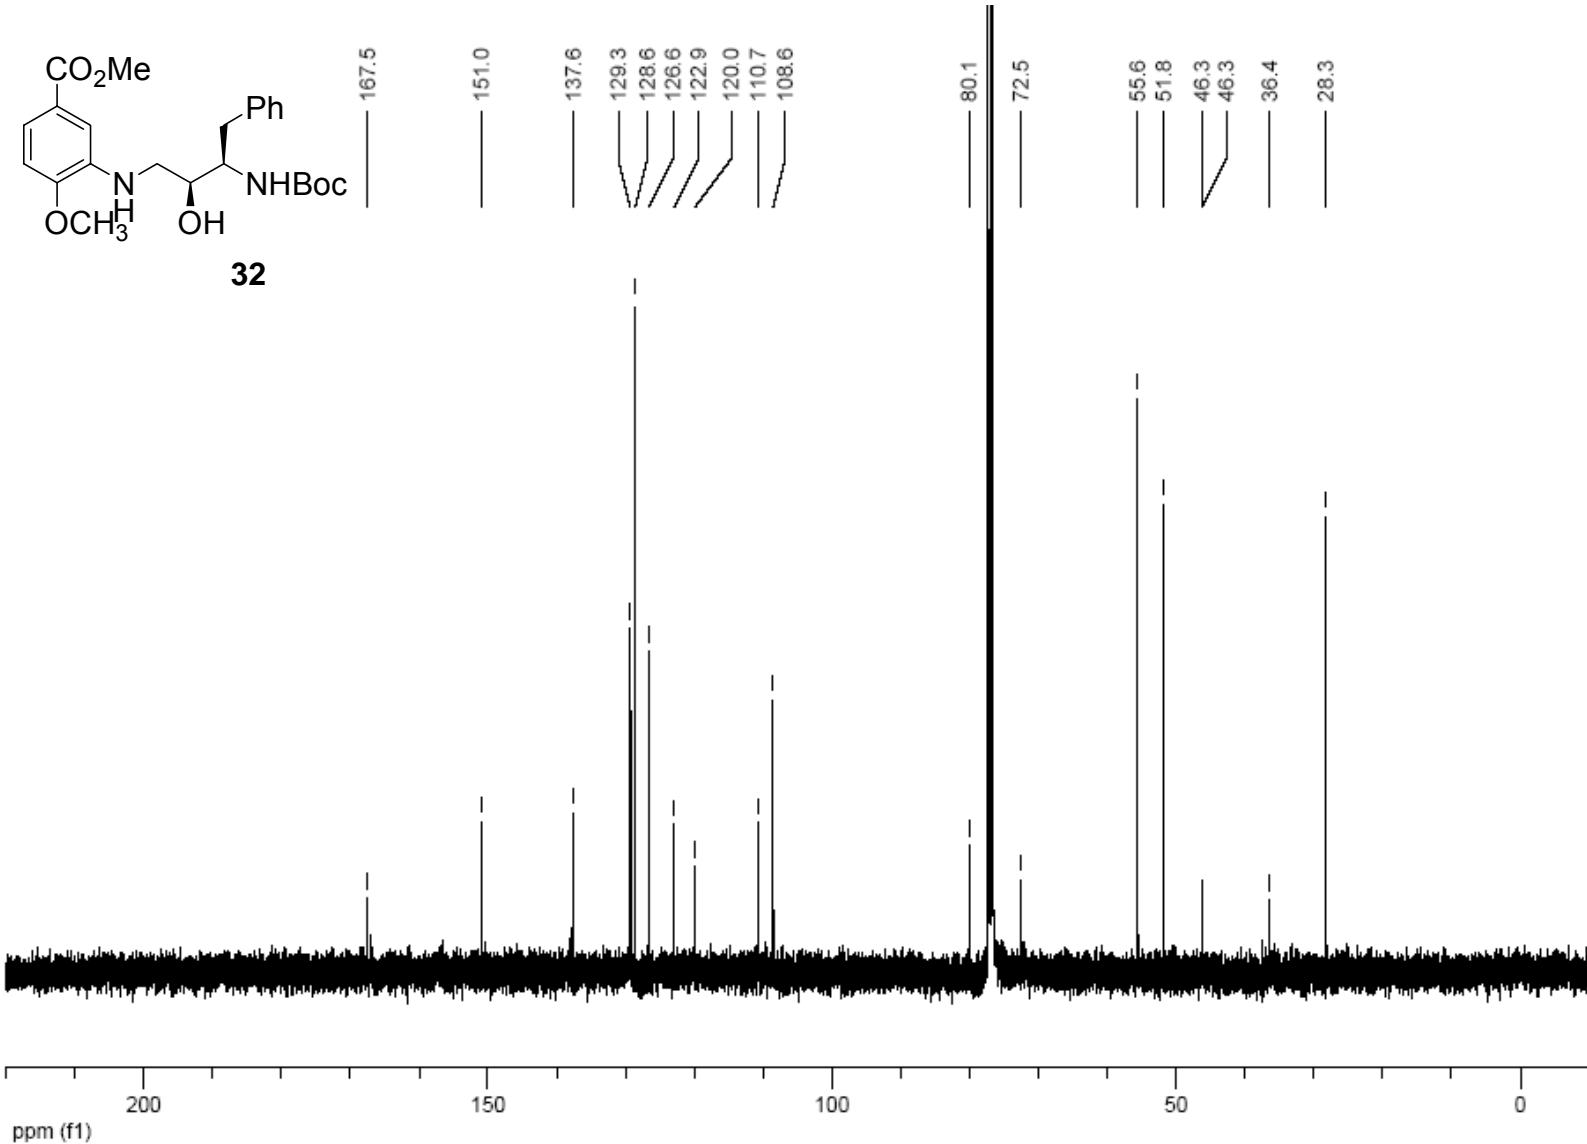

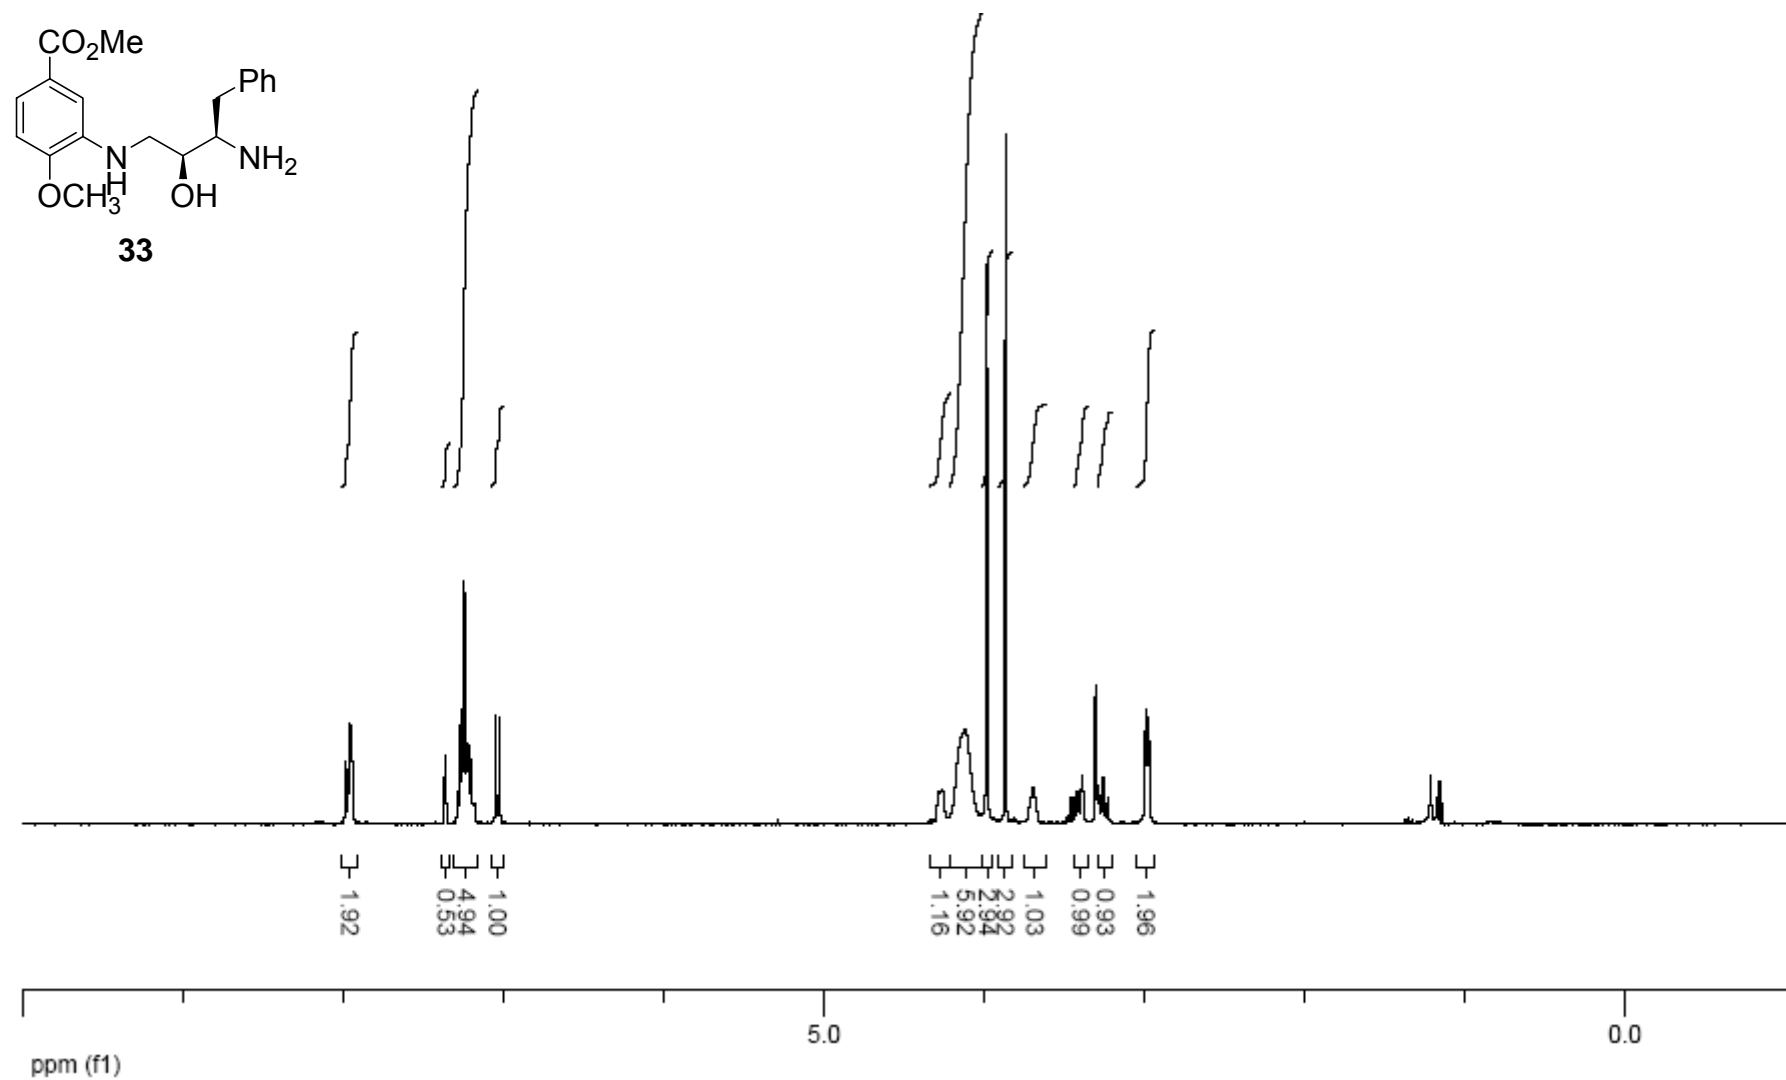



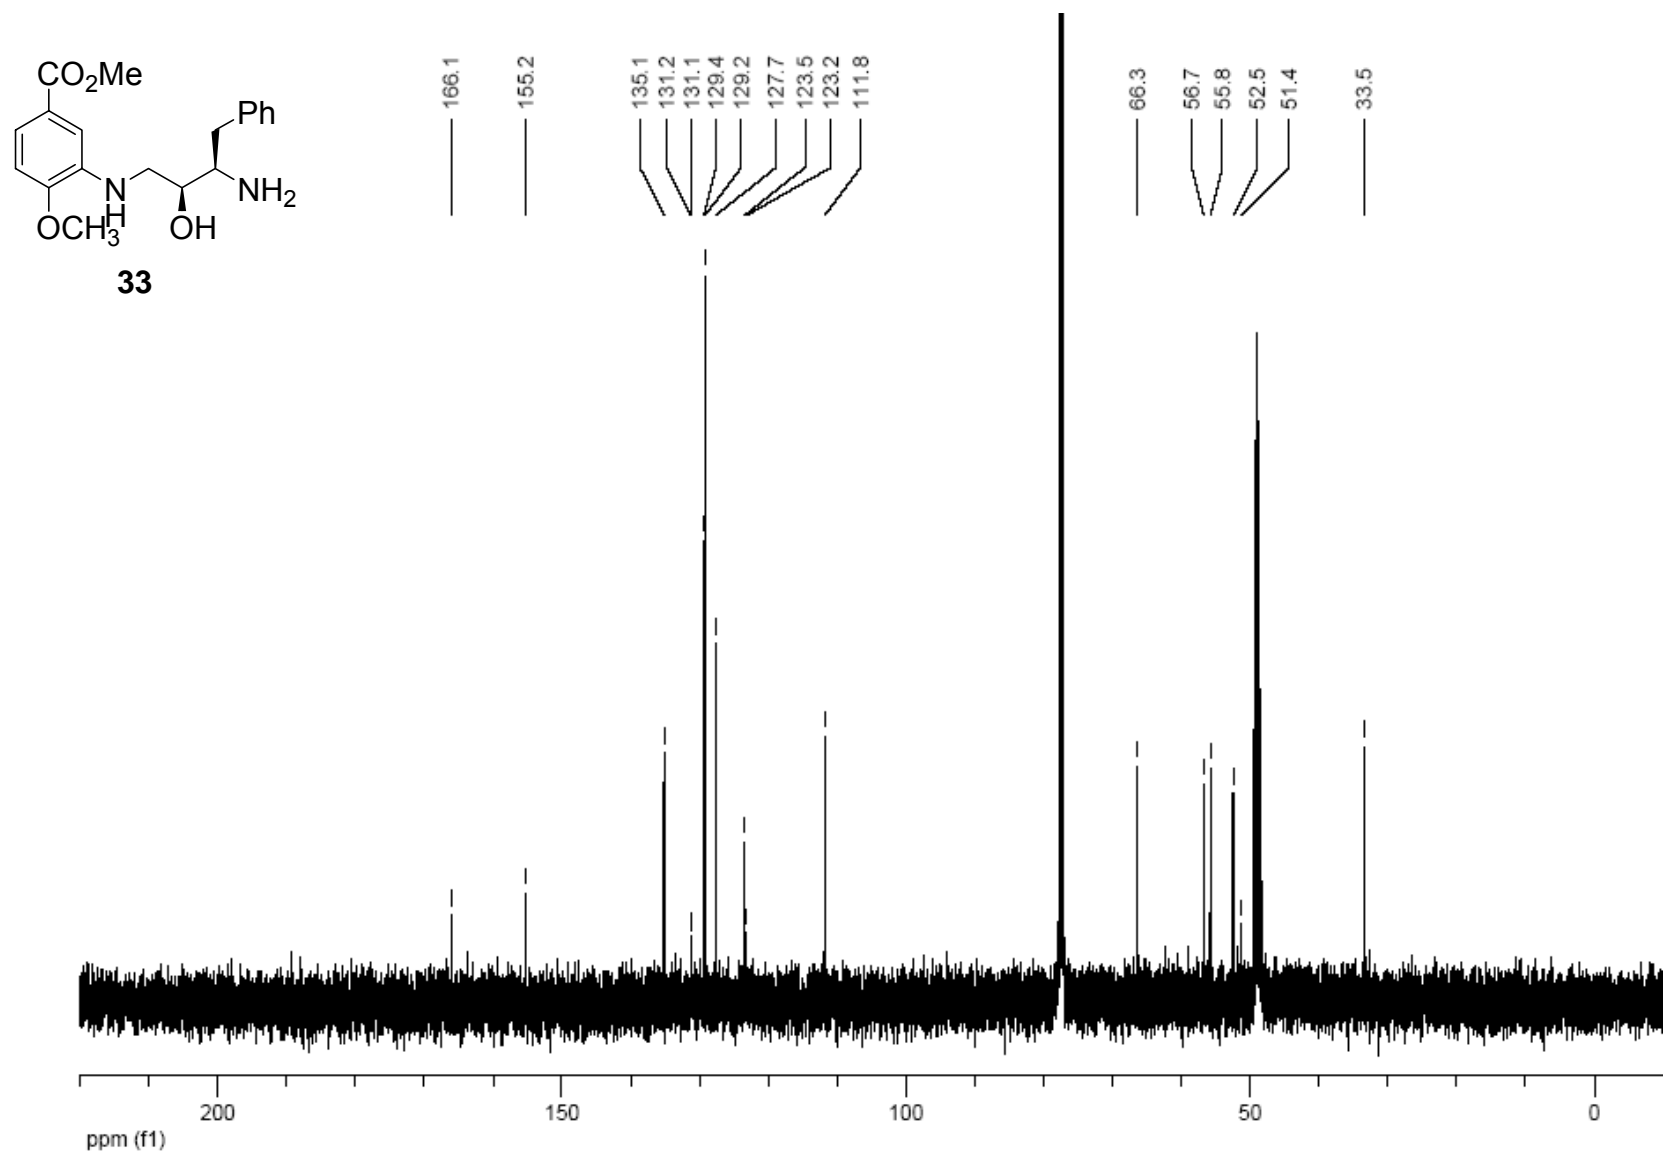

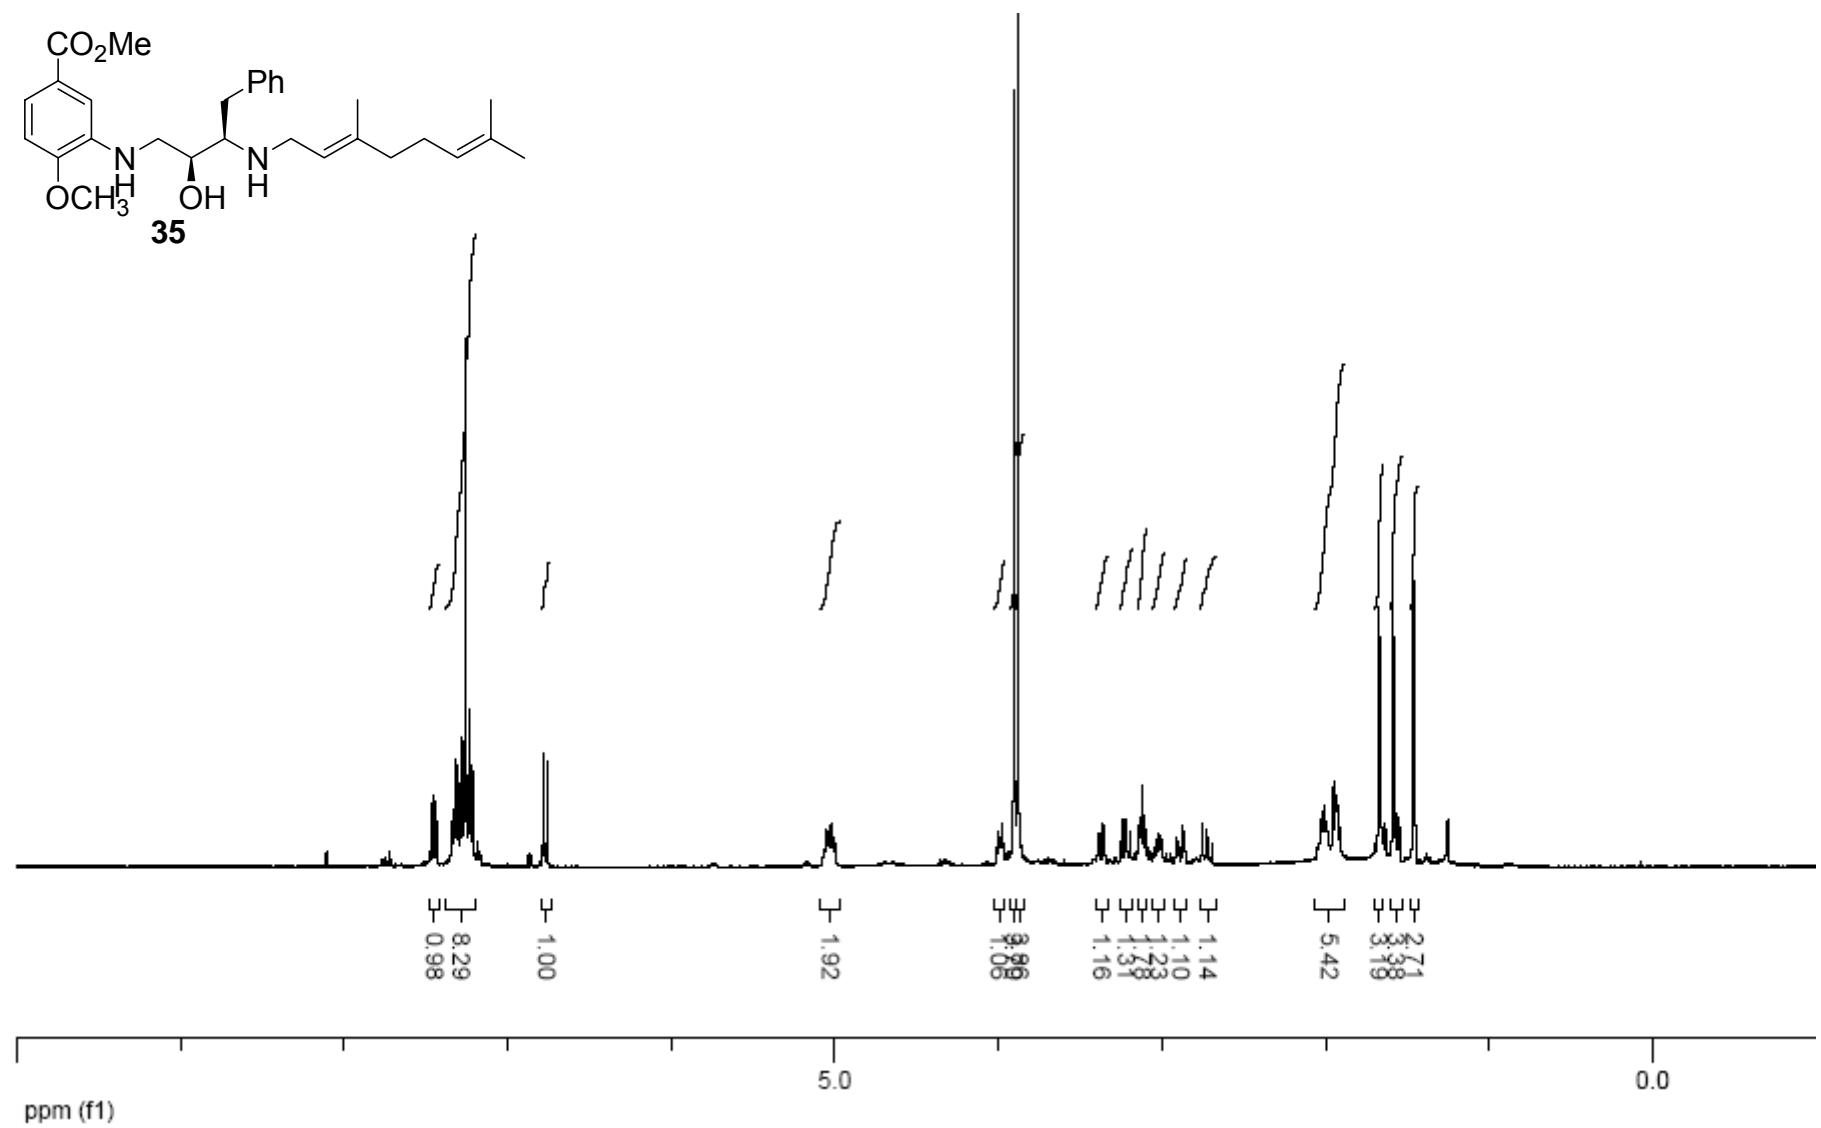

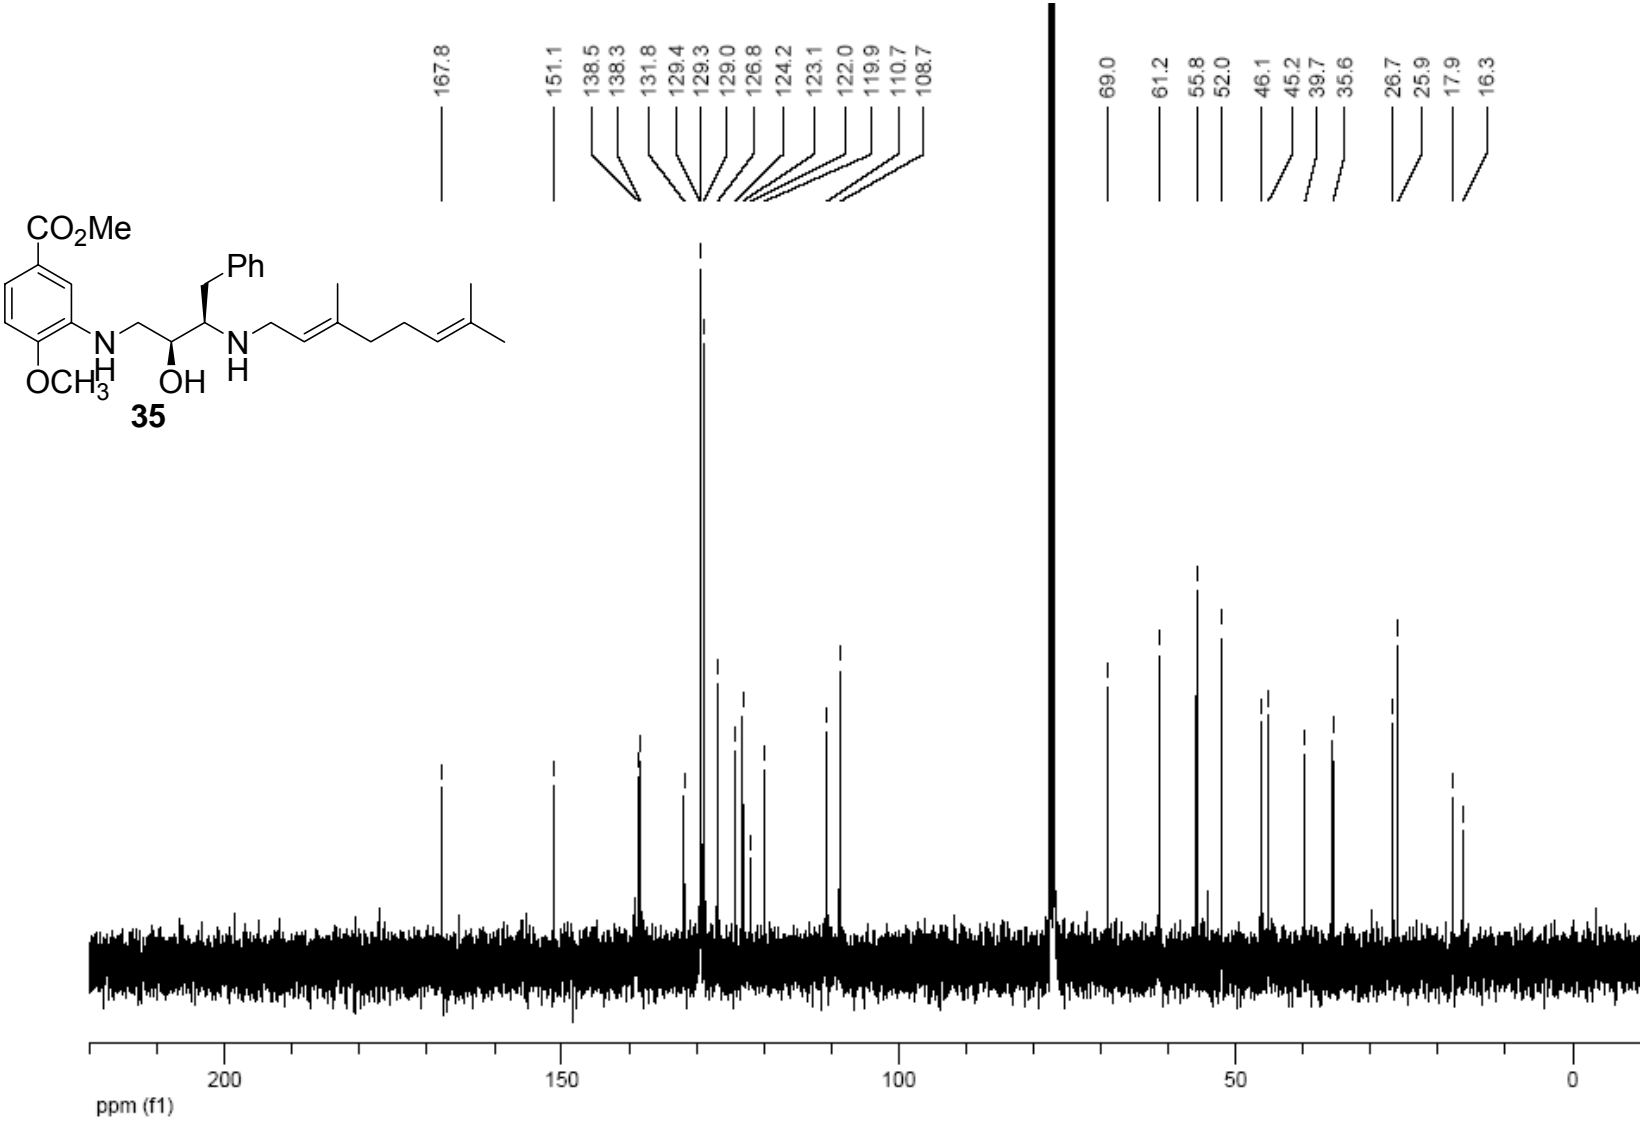

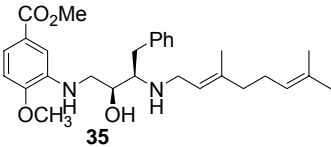

NOESY-2d

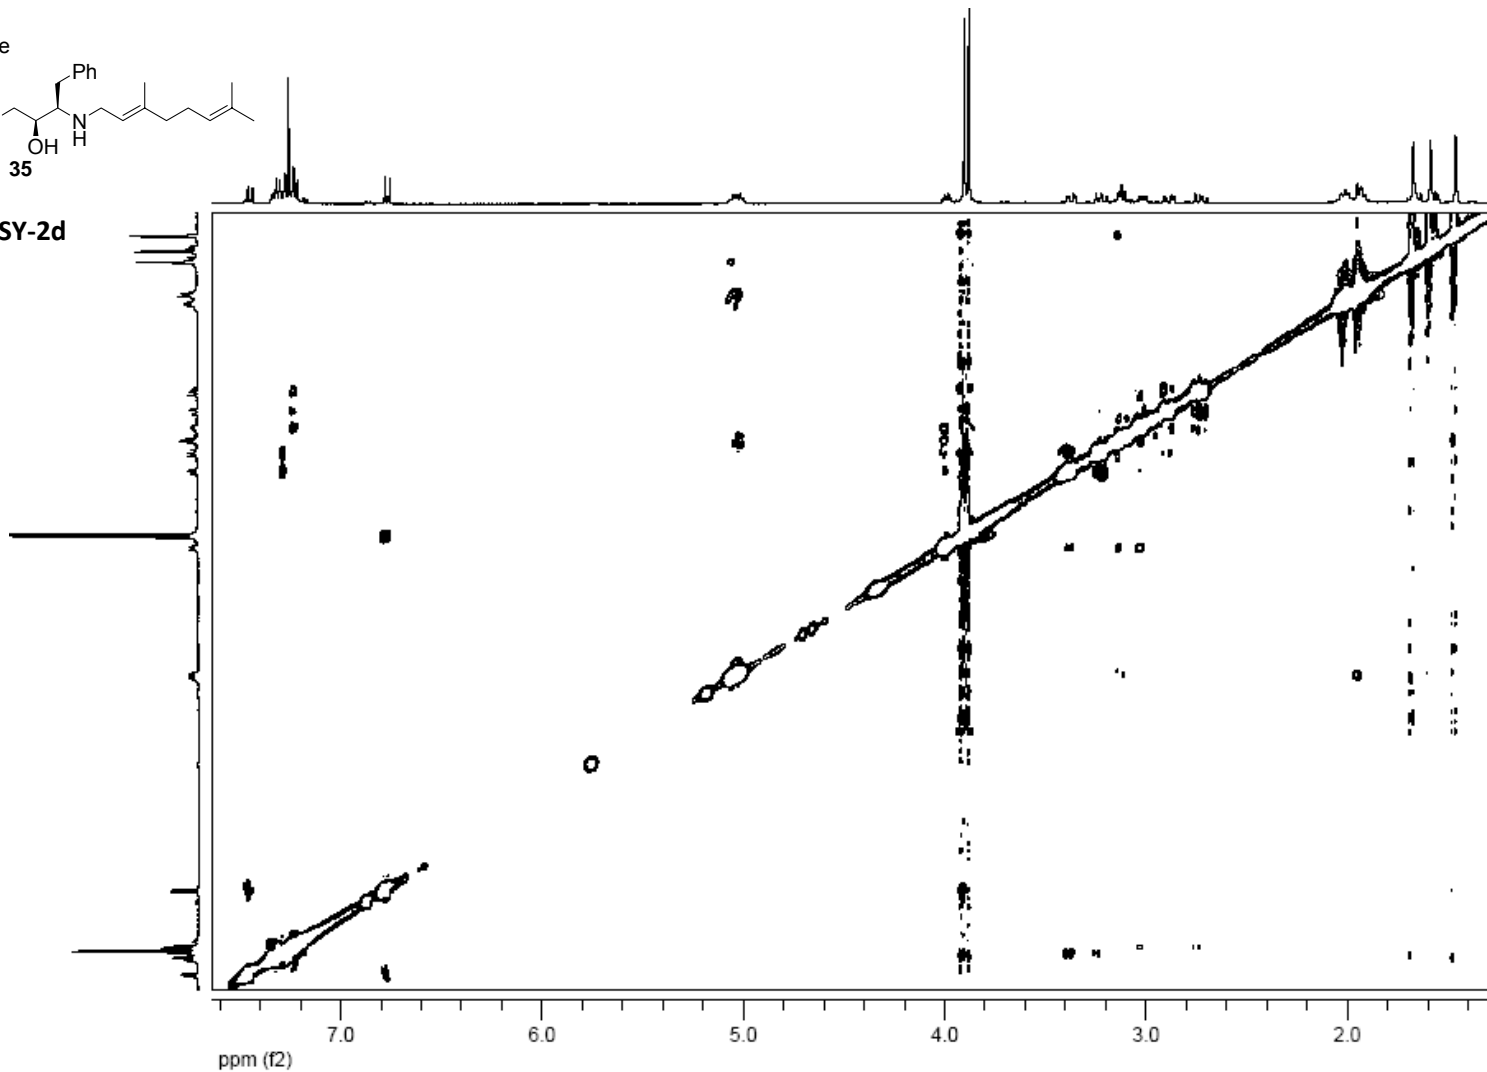

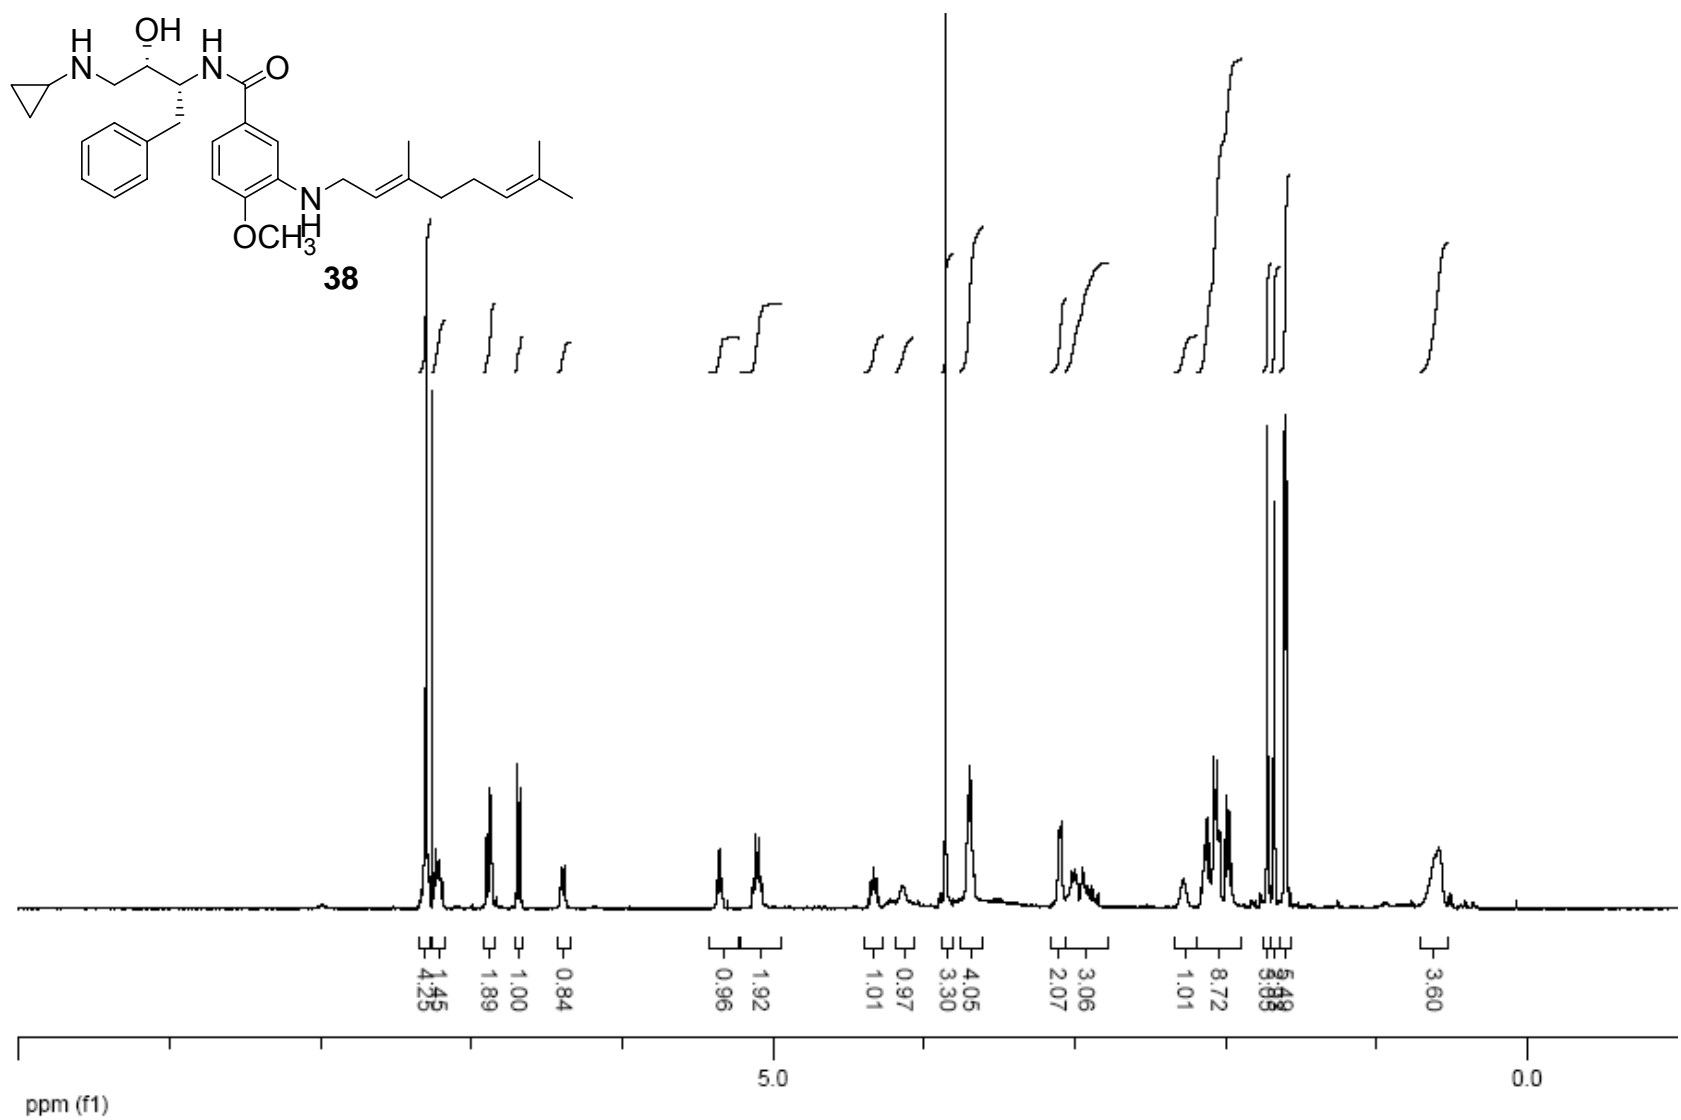

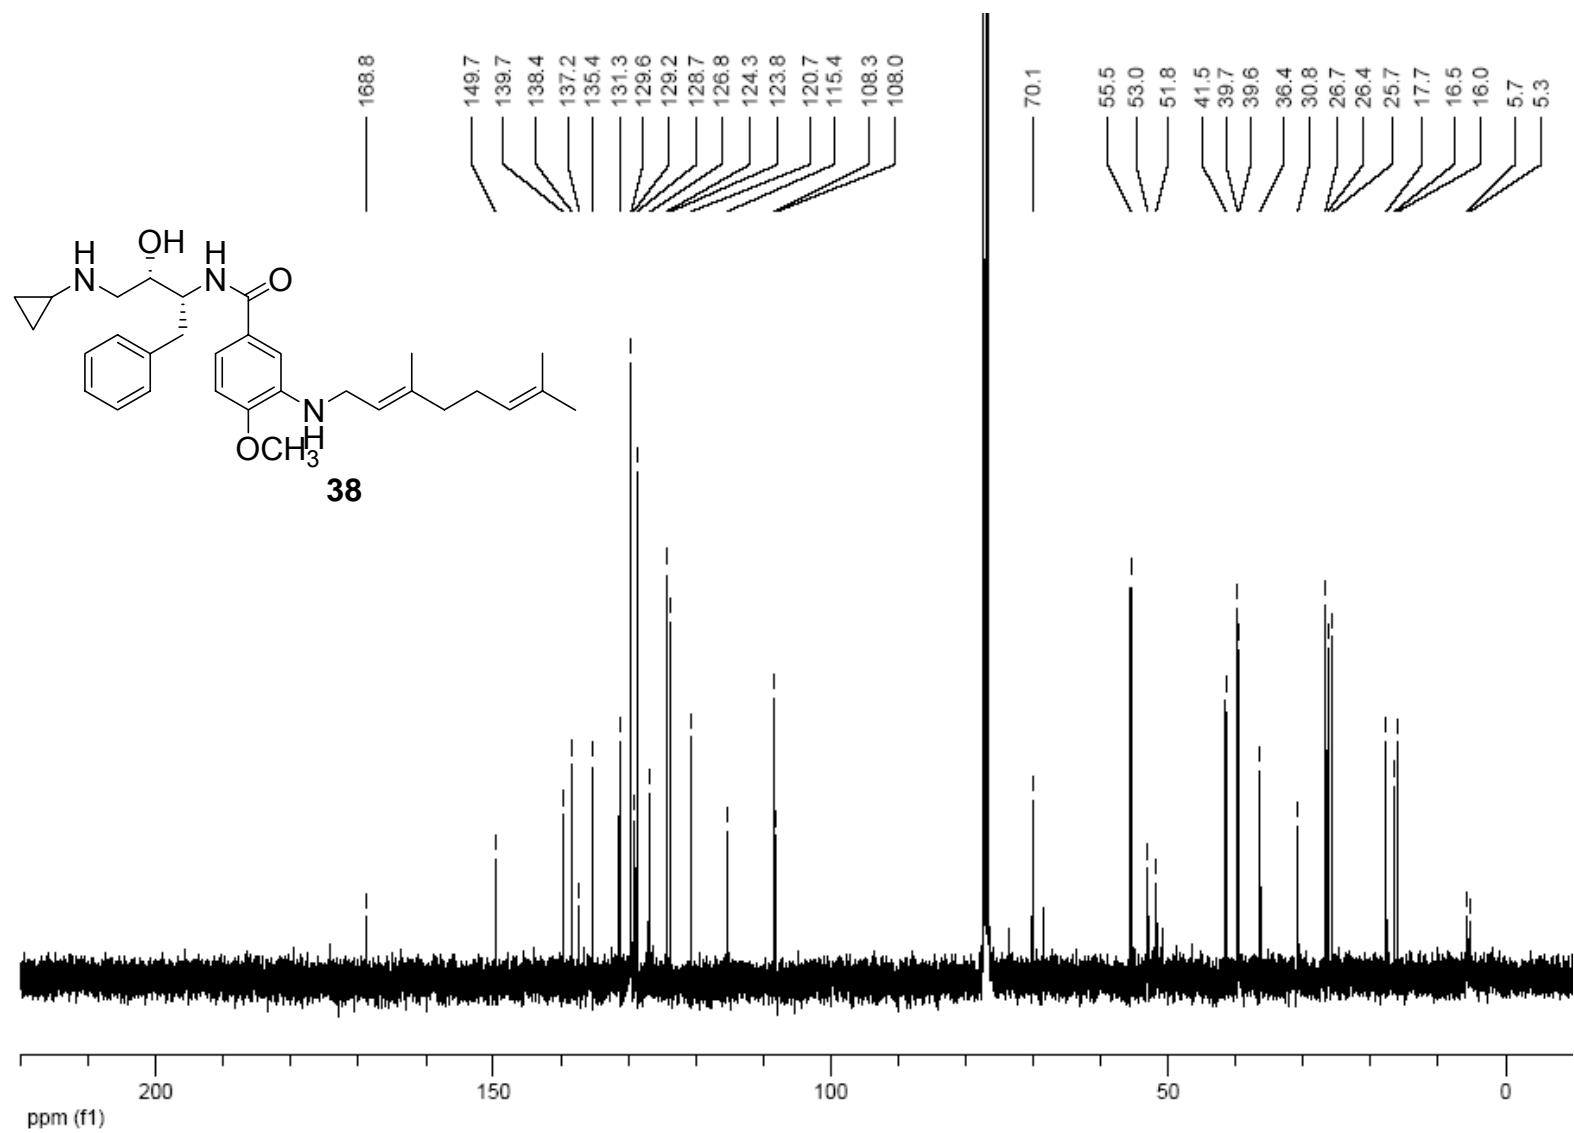

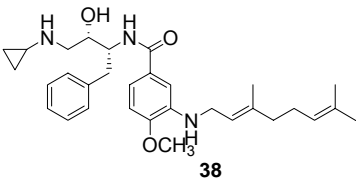

NOESY-2d

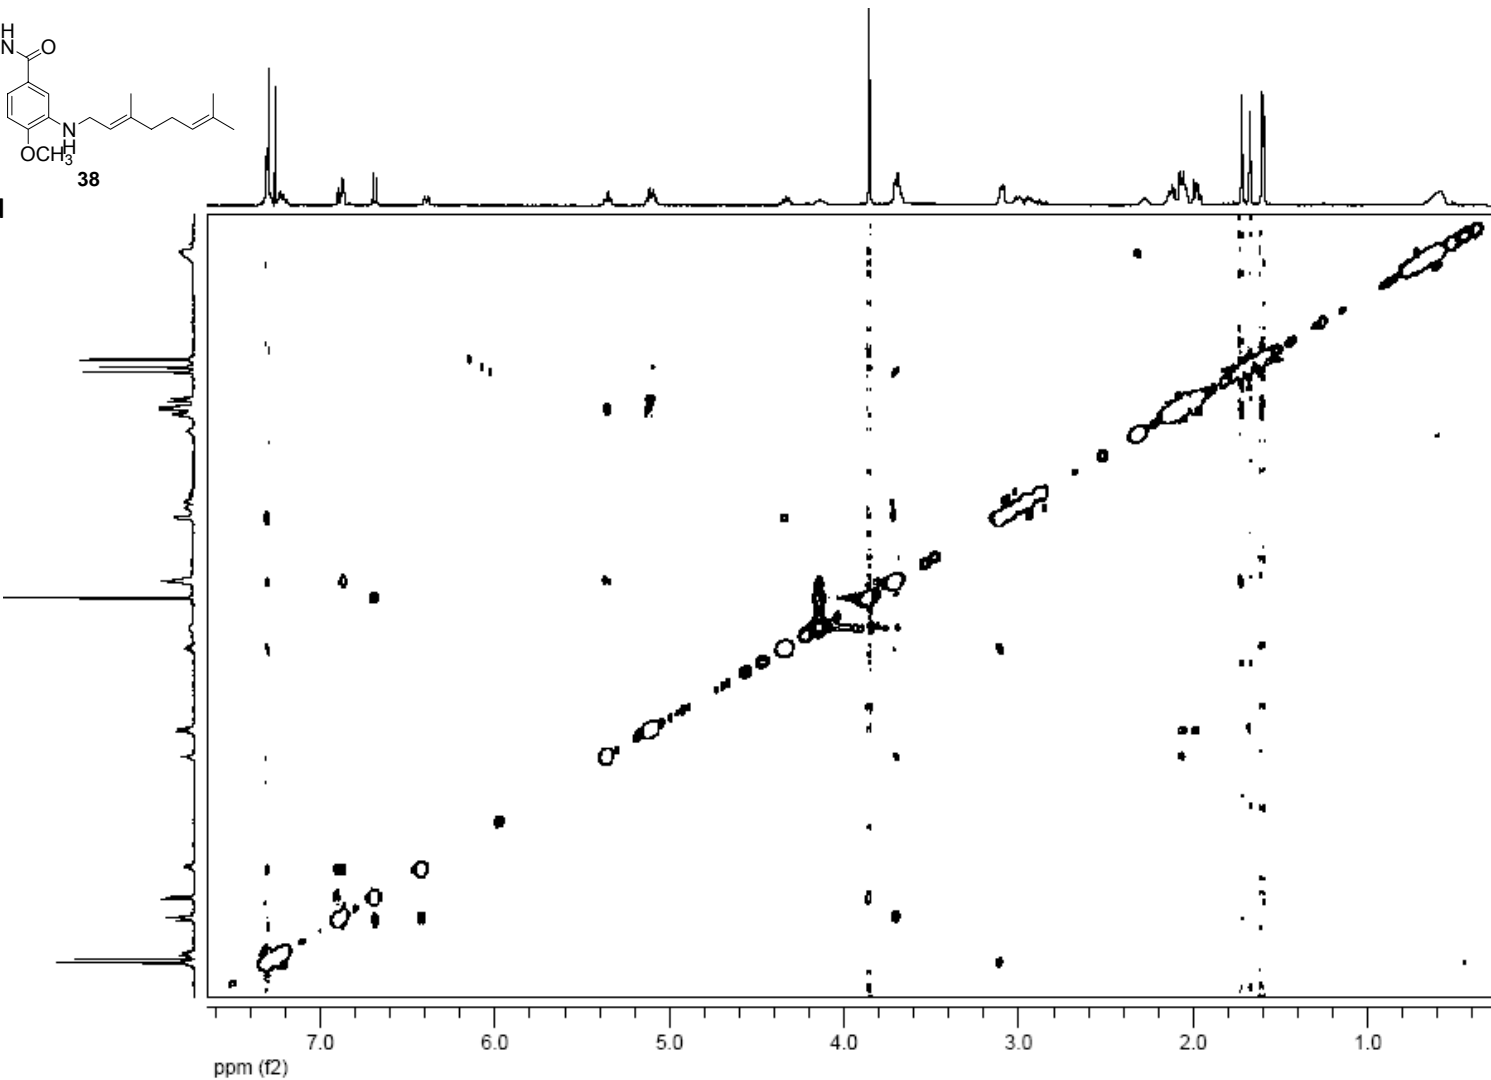

Supplement: c3md00236e.pdf [file c3md00236e.pdf]
